# Supplementary material
Source: MDPI journal article supplement (https://www.mdpi.com/1424-8247/15/7/781)
Supplement: s1 [file s1]

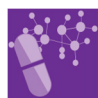

## Article

# Synthesis, In Vitro Antiproliferative Activity, and In Silico Evaluation of Novel Oxiranyl-Quinoxaline Derivatives

Vincent Montero <sup>1</sup>, Marc Montana <sup>1,2</sup>, Omar Khoumeri <sup>1</sup>, Florian Correard <sup>3,4</sup>, Marie-Anne Estève <sup>3,4</sup> and Patrice Vanelle <sup>1,5,\*</sup>

<sup>1</sup> Aix Marseille Univ, CNRS, ICR UMR 7273, Equipe Pharmaco-Chimie Radicalaire, Faculté de Pharmacie, 13385 Marseille Cedex 05, France; vincent.montero@etu.univ-amu.fr (V.M.); marc.montana@univ-amu.fr (M.M.); omar.khoumeri@univ-amu.fr (O.K.)

<sup>2</sup> APHM, Hôpital Timone, Oncopharma, 13005 Marseille, France

<sup>3</sup> Aix Marseille Univ, CNRS, INP, Inst Neurophysiopathol, 13385 Marseille Cedex 05, France; florian.correard@univ-amu.fr (F.C.); marie-anne.esteve@univ-amu.fr (M.-A.E.)

<sup>4</sup> APHM, Hôpital Timone, Service Pharmacie, 13005 Marseille, France

<sup>5</sup> APHM, Hôpital Conception, Service Central de la Qualité et de l'Information Pharmaceutiques, 13005 Marseille, France

\* Correspondence: patrice.vanelle@univ-amu.fr; Tel.: +33-4-91-83-55-80

## SUPPLEMENTARY DATA

- Compound 2a
- Compound 2b
- Compound 3a
- Compound 4a
- Compound 4b
- Compound 5a
- Compound 5b
- Compound 6a
- Compound 7a
- Compound 7b
- Compound 8a
- Compound 8b
- Compound 9a
- Compound 9b
- Compound 10a
- Compound 10b
- Compound 11a
- Compound 11b
- Compound 12a
- Compound 13
- Compound 14a
- Compound 14b
- Compound 15a
- Compound 16a
- Compound 16b
- Compound 17a
- Compound 17b
- Compound 18a
- Compound 19a
- Compound 19b
- Compound 20a
- Compound 20b
- Compound 21a
- Compound 21b
- Compound 22a
- Compound 22b
- Compound 23a
- Compound 23b
- Compound 24a
- Compound 25

## Compound 2a

PEP13F1

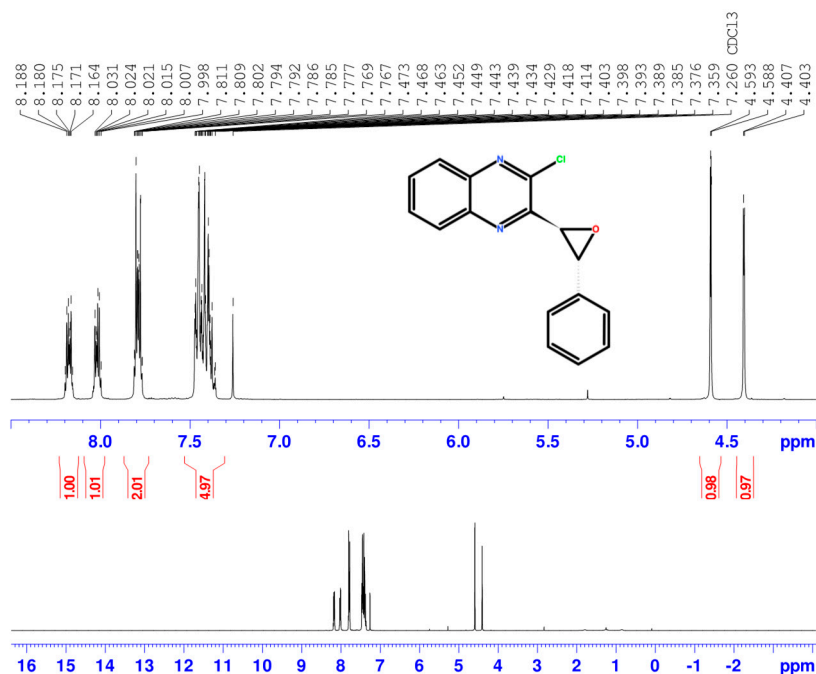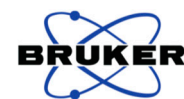

Current Data Parameters  
NAME PEP13\_F1\_1H  
EXPNO 1  
PROCNO 1

F2 - Acquisition Parameters  
Date\_ 20200611  
Time 11.53 h  
INSTRUM Avance NEO 400  
PROBHD Z163739\_0130 (1  
PULPROG zg30  
TD 65536  
SOLVENT CDCl3  
NS 16  
DS 2  
SWH 8196.722 Hz  
FIDRES 0.250144 Hz  
AQ 3.9976959 sec  
RG 61.9951  
DW 61.000 usec  
DE 13.97 usec  
TE 298.0 K  
D1 1.00000000 sec  
D11 1  
SFO1 400.1324708 MHz  
NUC1 1H  
P0 2.51 usec  
P1 7.53 usec  
PLW1 22.809999947 W

F2 - Processing parameters  
SI 65536  
SF 400.1300102 MHz  
WDW EM  
SSB 0  
LB 0.30 Hz  
GB 0  
PC 1.00

PEP13trans

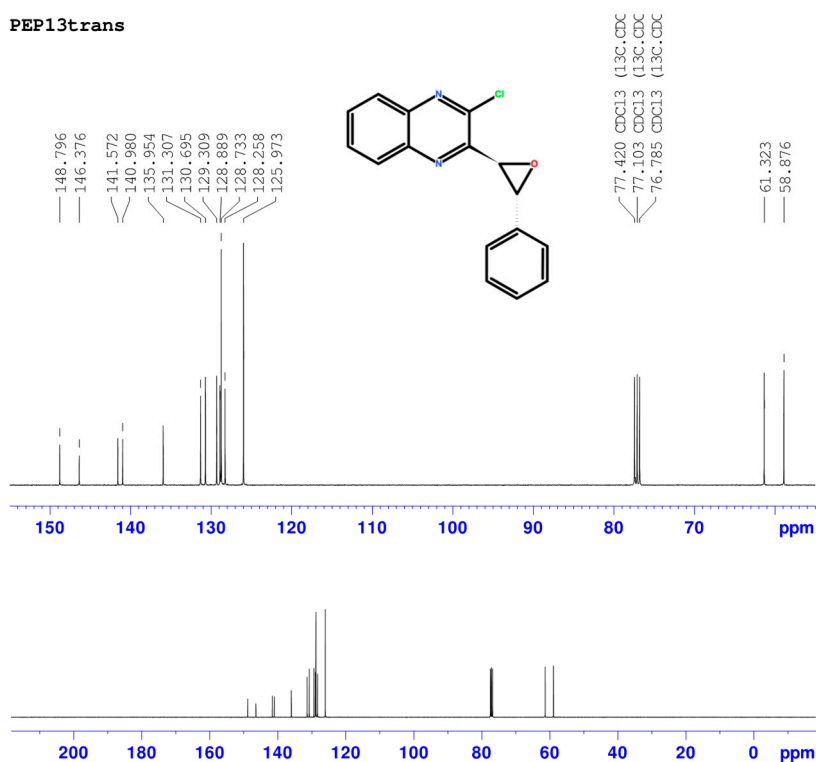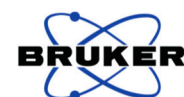

Current Data Parameters  
NAME PEP13\_F1\_13C  
EXPNO 20  
PROCNO 1

F2 - Acquisition Parameters  
Date\_ 20200611  
Time 20.47 h  
INSTRUM Avance NEO 400  
PROBHD Z163739\_0130 (1  
PULPROG zgpg30  
TD 65536  
SOLVENT CDCl3  
NS 1024  
DS 4  
SWH 23809.523 Hz  
FIDRES 0.726609 Hz  
AQ 1.3762560 sec  
RG 101  
DW 21.000 usec  
DE 6.50 usec  
TE 298.0 K  
D1 2.00000000 sec  
D11 0.03000000 sec  
TD 1  
SFO1 100.6228298 MHz  
NUC1 13C  
P0 2.67 usec  
P1 8.00 usec  
PLW1 95.56300354 W  
SFO2 400.1316005 MHz  
NUC2 1H  
CPCPD2 waltz165  
PCPD2 90.00 usec  
PLW2 22.809999947 W  
PLW12 0.15967000 W  
PLW13 0.08031400 W

F2 - Processing parameters  
SI 32768  
SF 100.6127685 MHz  
WDW EM  
SSB 0  
LB 1.00 Hz  
GB 0  
PC 1.40

Data File C:\Chem32\...\rganique\prestation\_chimie\_organique 2022-05-31\OnlineEdited--016.D  
 Sample Name: PEP13F1

```
=====
Acq. Operator   : SYSTEM                      Seq. Line :   16
Acq. Instrument : LC1290                     Location  :   P1-B6
Injection Date  : 31/5/2022 5:05:54 PM       Inj       :    1
                                           Inj Volume: 1.000 µl
Method         : C:\Chem32\1\Data\prestation_chimie_organique\prestation_chimie_organique
                  2022-05-31\prestation_chimie_org.M (Sequence Method)
Last changed    : 31/5/2022 1:07:56 PM by SYSTEM
Additional Info : Peak(s) manually integrated
=====
```

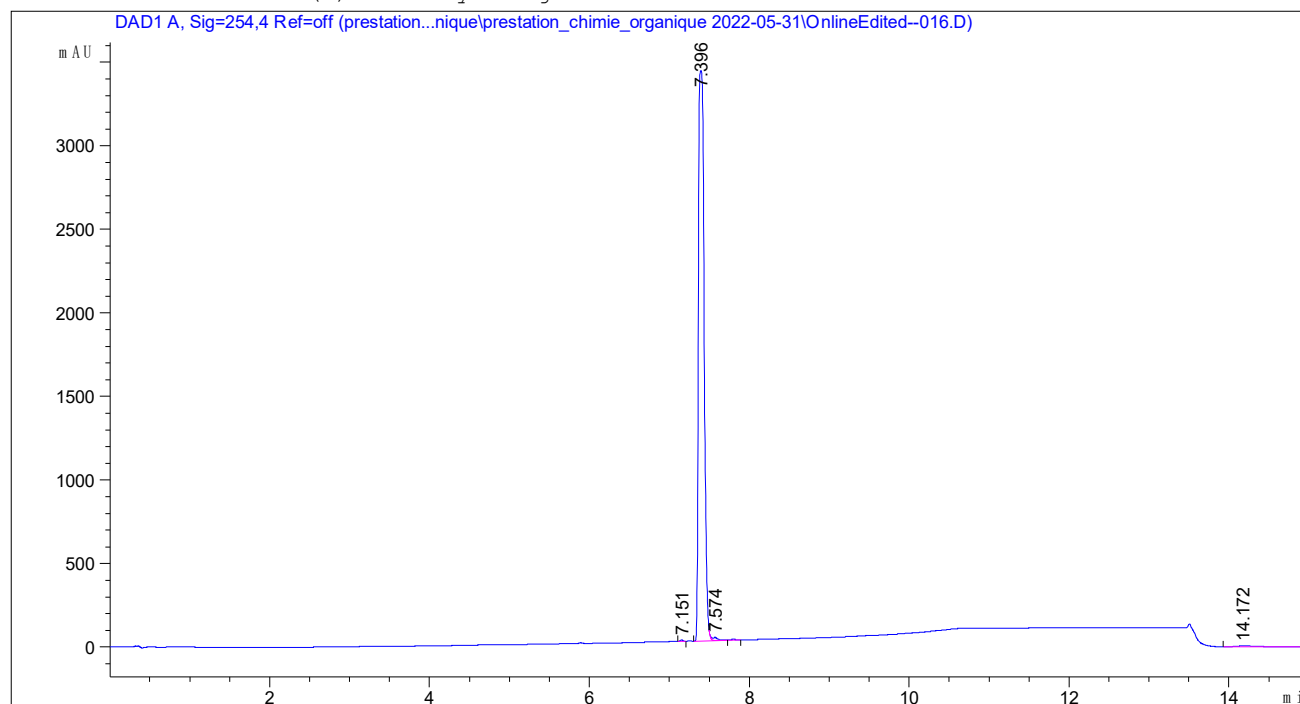

=====  
 Area Percent Report  
 =====

```
Sorted By      :      Signal
Multiplier     :      1.0000
Dilution       :      1.0000
Use Multiplier & Dilution Factor with ISTDs
```

Signal 1: DAD1 A, Sig=254,4 Ref=off

| Peak # | RetTime [min] | Type | Width [min] | Area [mAU*s] | Height [mAU] | Area %  |
|--------|---------------|------|-------------|--------------|--------------|---------|
| 1      | 7.151         | BV   | 0.0378      | 22.95683     | 9.30063      | 0.1344  |
| 2      | 7.396         | BV R | 0.0785      | 1.68333e4    | 3412.13135   | 98.5352 |
| 3      | 7.574         | VV E | 0.0666      | 96.25467     | 19.49225     | 0.5634  |
| 4      | 14.172        | BBA  | 0.2724      | 131.02750    | 6.17944      | 0.7670  |

Totals :                      1.70835e4 3447.10367

## Compound 2b

PEP13F2

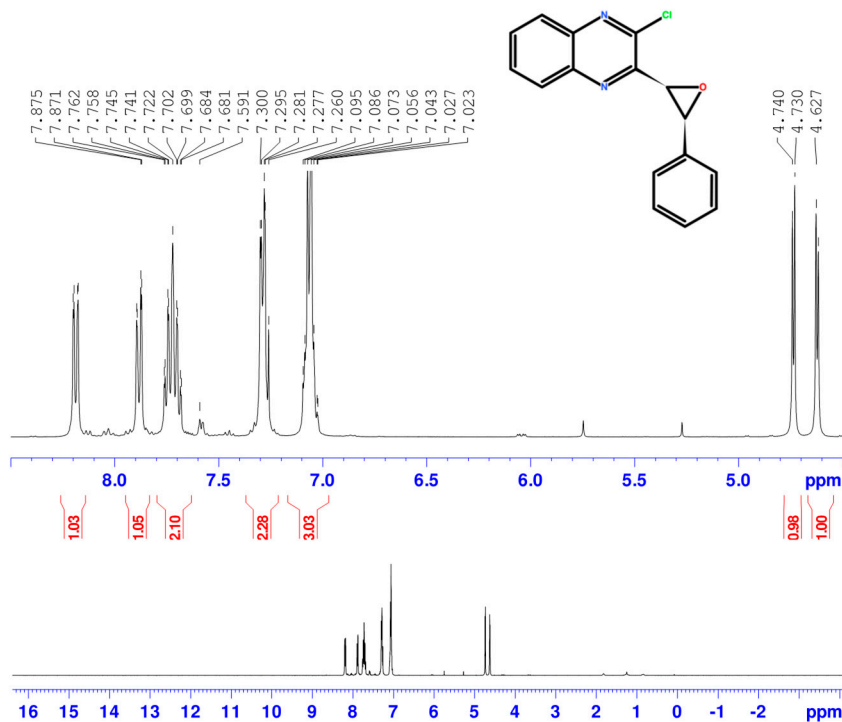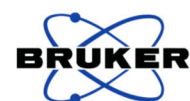

Current Data Parameters  
 NAME PEP13\_F2\_1H  
 EXPNO 10  
 PROCNO 1

F2 - Acquisition Parameters  
 Date\_ 20200611  
 Time 11.41 h  
 INSTRUM Avance NEO 400  
 PROBHD Z163739\_0130 (   
 PULPROG zg30  
 TD 65536  
 SOLVENT CDCl3  
 NS 16  
 DS 2  
 SWH 8196.722 Hz  
 FIDRES 0.250144 Hz  
 AQ 3.9976959 sec  
 RG 53.0812  
 DW 61.000 usec  
 DE 13.97 usec  
 TE 298.0 K  
 D1 1.00000000 sec  
 TD0 1  
 SFO1 400.1324708 MHz  
 NUC1 1H  
 P0 2.51 usec  
 P1 7.53 usec  
 PLW1 22.80999947 W

F2 - Processing parameters  
 SI 65536  
 SF 400.1300103 MHz  
 WDW EM  
 SSB 0  
 LB 0.30 Hz  
 GB 0  
 PC 1.00

PEP13cis

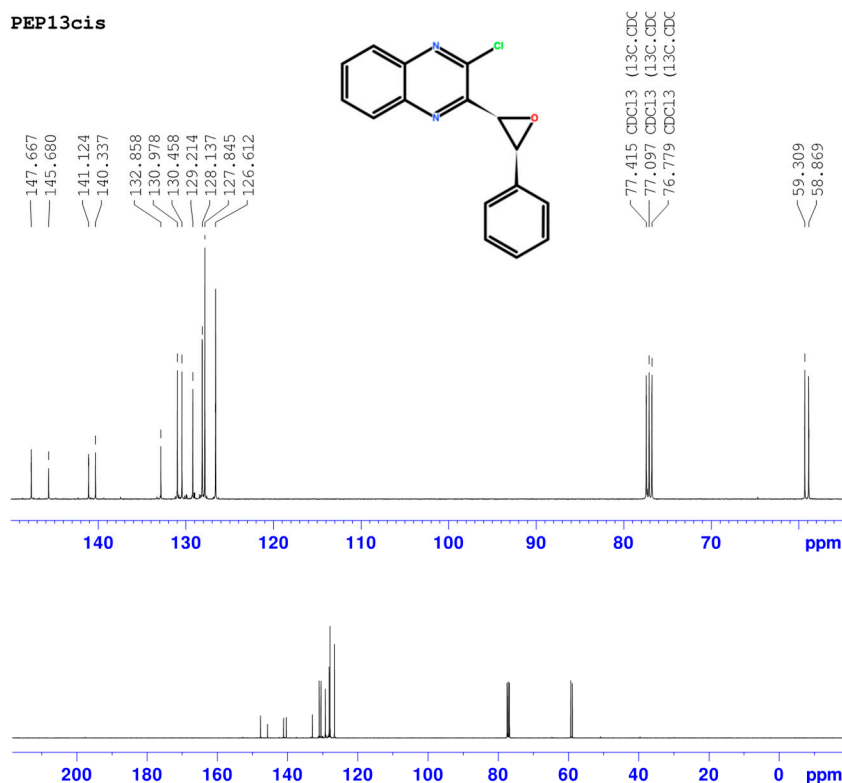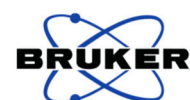

Current Data Parameters  
 NAME PEP13\_F2\_13C  
 EXPNO 20  
 PROCNO 1

F2 - Acquisition Parameters  
 Date\_ 20200614  
 Time 8.15 h  
 INSTRUM Avance NEO 400  
 PROBHD Z163739\_0130 (   
 PULPROG zgpg30  
 TD 65536  
 SOLVENT CDCl3  
 NS 2048  
 DS 4  
 SWH 23809.523 Hz  
 FIDRES 0.726609 Hz  
 AQ 1.3762560 sec  
 RG 101  
 DW 21.000 usec  
 DE 6.50 usec  
 TE 298.0 K  
 D1 2.00000000 sec  
 D11 0.03000000 sec  
 TD0 1  
 SFO1 100.628298 MHz  
 NUC1 13C  
 P0 2.67 usec  
 P1 8.00 usec  
 PLW1 95.56300354 W  
 SFO2 400.1316005 MHz  
 NUC2 1H  
 CPGPRG2 waltz65  
 PCPD2 90.00 usec  
 PLW2 22.80999947 W  
 PLW12 0.15967000 W  
 PLW13 0.08031400 W

F2 - Processing parameters  
 SI 32768  
 SF 100.6127685 MHz  
 WDW EM  
 SSB 0  
 LB 1.00 Hz  
 GB 0  
 PC 1.40



Data File C:\Chem32\...\rganique\prestation\_chimie\_organique 2022-05-31\OnlineEdited--017.D  
Sample Name: PEP13F2

```
=====
Acq. Operator   : SYSTEM                      Seq. Line :   17
Acq. Instrument : LC1290                     Location  :   P1-B7
Injection Date  : 31/5/2022 5:21:42 PM        Inj       :    1
                                           Inj Volume: 1.000 µl

Method          : C:\Chem32\1\Data\prestation_chimie_organique\prestation_chimie_organique
                  2022-05-31\prestation_chimie_org.M (Sequence Method)
Last changed    : 31/5/2022 1:07:56 PM by SYSTEM
Additional Info  : Peak(s) manually integrated
```

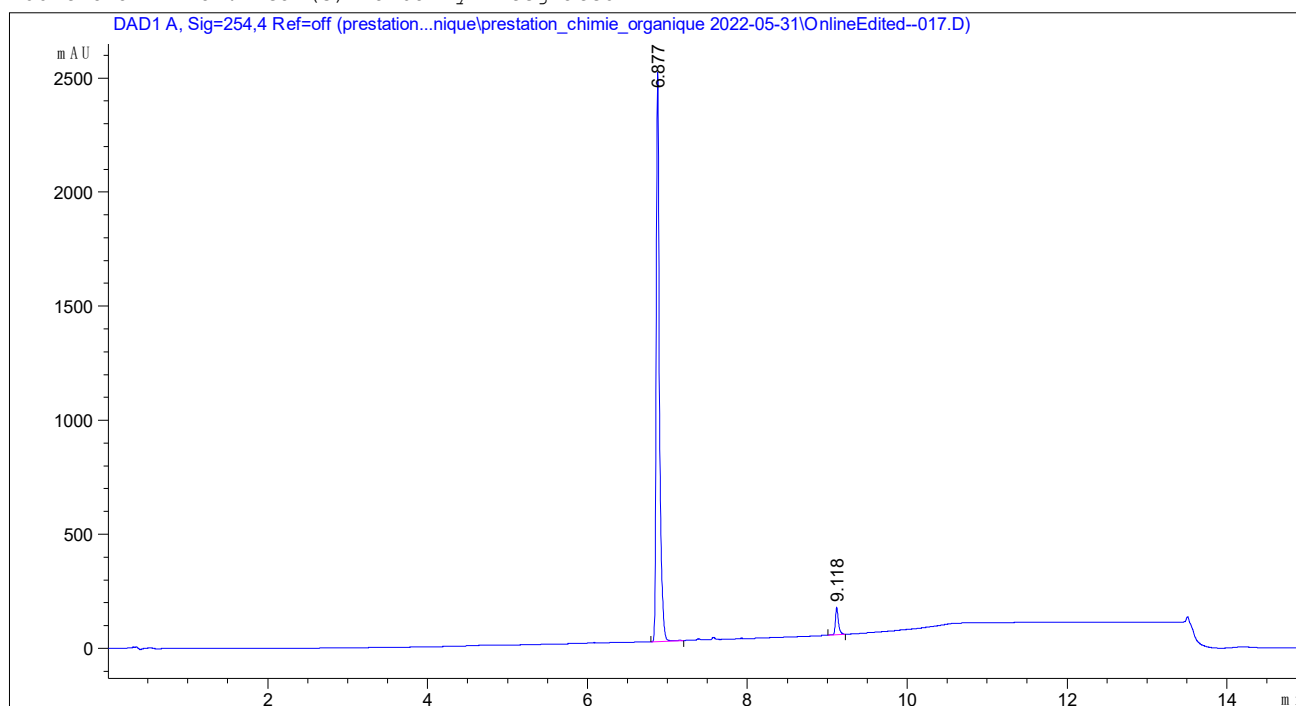

```
=====
                        Area Percent Report
=====
```

```
Sorted By      :      Signal
Multiplier     :      1.0000
Dilution       :      1.0000
Use Multiplier & Dilution Factor with ISTDs
```

Signal 1: DAD1 A, Sig=254,4 Ref=off

| Peak # | RetTime [min] | Type | Width [min] | Area [mAU*s] | Height [mAU] | Area %  |
|--------|---------------|------|-------------|--------------|--------------|---------|
| 1      | 6.877         | BV R | 0.0424      | 7131.84277   | 2494.35254   | 95.8686 |
| 2      | 9.118         | VB R | 0.0377      | 307.34372    | 120.69427    | 4.1314  |

Totals : 7439.18649 2615.04681

```
=====
                        *** End of Report ***
```

## Compound 3a

PEP14F1

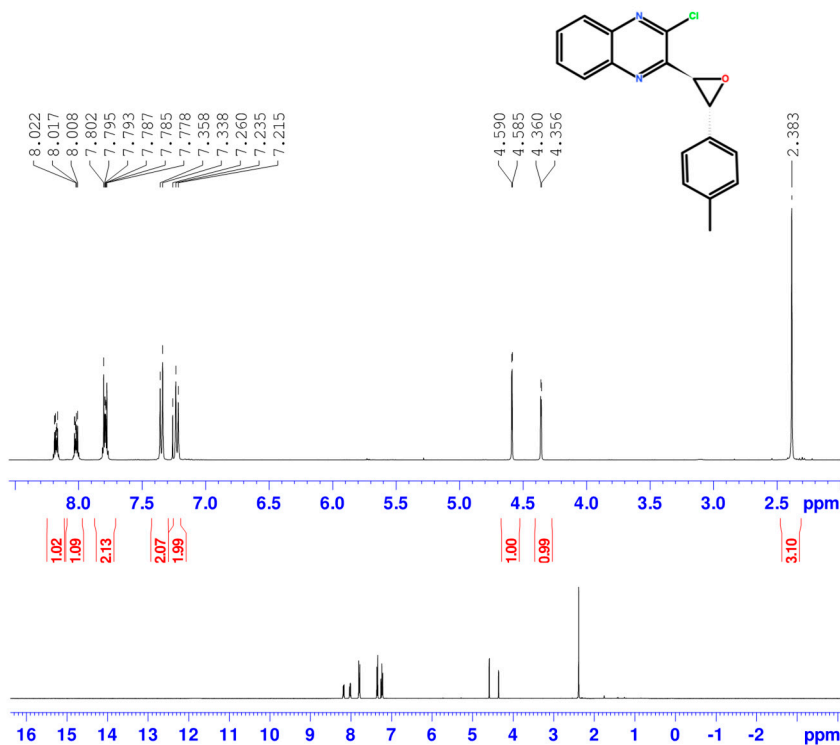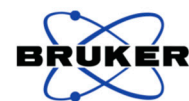

Current Data Parameters  
 NAME PEP14\_F1\_1H  
 EXPNO 11  
 PROCNO 1

F2 - Acquisition Parameters  
 Date\_ 20200611  
 Time 12.07 h  
 INSTRUM Avance NEO 400  
 PROBHD Z163739\_0130 (   
 PULPROG zg30  
 TD 65536  
 SOLVENT CDCl3  
 NS 16  
 DS 2  
 SWH 8196.722 Hz  
 FIDRES 0.250144 Hz  
 AQ 3.9976959 sec  
 RG 55.5128  
 DW 61.000 usec  
 DE 13.97 usec  
 TE 298.0 K  
 D1 1.00000000 sec  
 TD0 1  
 SFO1 400.1324708 MHz  
 NUC1 1H  
 P0 2.51 usec  
 P1 7.53 usec  
 PLW1 22.80999947 W

F2 - Processing parameters  
 SI 65536  
 SF 400.1300102 MHz  
 WDW EM  
 SSB 0  
 LB 0.30 Hz  
 GB 0  
 PC 1.00

PEP14F1

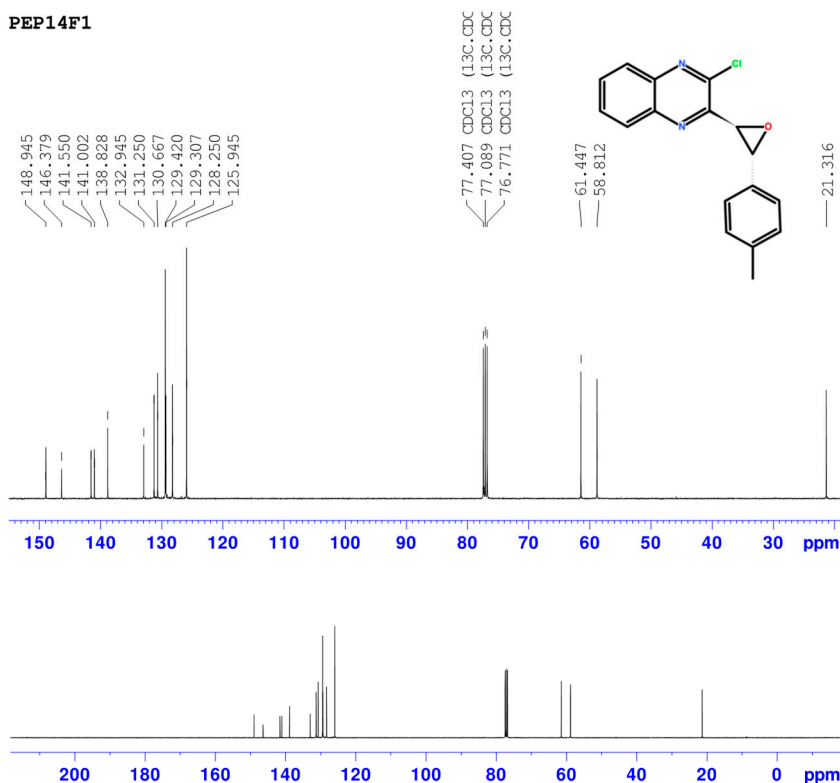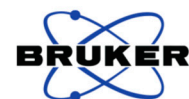

Current Data Parameters  
 NAME PEP14\_F1\_13C  
 EXPNO 22  
 PROCNO 1

F2 - Acquisition Parameters  
 Date\_ 20200611  
 Time 15.12 h  
 INSTRUM Avance NEO 400  
 PROBHD Z163739\_0130 (   
 PULPROG zgpg30  
 TD 65536  
 SOLVENT CDCl3  
 NS 1024  
 DS 4  
 SWH 23809.523 Hz  
 FIDRES 0.726609 Hz  
 AQ 1.3762560 sec  
 RG 101  
 DW 21.000 usec  
 DE 6.50 usec  
 TE 298.0 K  
 D1 2.00000000 sec  
 D11 0.03000000 sec  
 TD0 1  
 SFO1 100.628298 MHz  
 NUC1 13C  
 P0 2.67 usec  
 P1 8.00 usec  
 PLW1 95.56300354 W  
 SFO2 400.1316005 MHz  
 NUC2 1H  
 CPGPRG2 waltz65  
 PCPD2 90.00 usec  
 PLW2 22.80999947 W  
 PLW12 0.15967000 W  
 PLW13 0.08031400 W

F2 - Processing parameters  
 SI 32768  
 SF 100.6127685 MHz  
 WDW EM  
 SSB 0  
 LB 1.00 Hz  
 GB 0  
 PC 1.40

Data File C:\Chem32\...\rganique\prestation\_chimie\_organique 2022-05-31\OnlineEdited--018.D  
Sample Name: PEP14F1

```
=====
Acq. Operator   : SYSTEM                      Seq. Line :   18
Acq. Instrument : LC1290                     Location  :   P1-B8
Injection Date  : 31/5/2022 5:37:31 PM        Inj       :    1
                                           Inj Volume: 1.000 µl
Method          : C:\Chem32\1\Data\prestation_chimie_organique\prestation_chimie_organique
                  2022-05-31\prestation_chimie_org.M (Sequence Method)
Last changed    : 31/5/2022 1:07:56 PM by SYSTEM
Additional Info  : Peak(s) manually integrated
=====
```

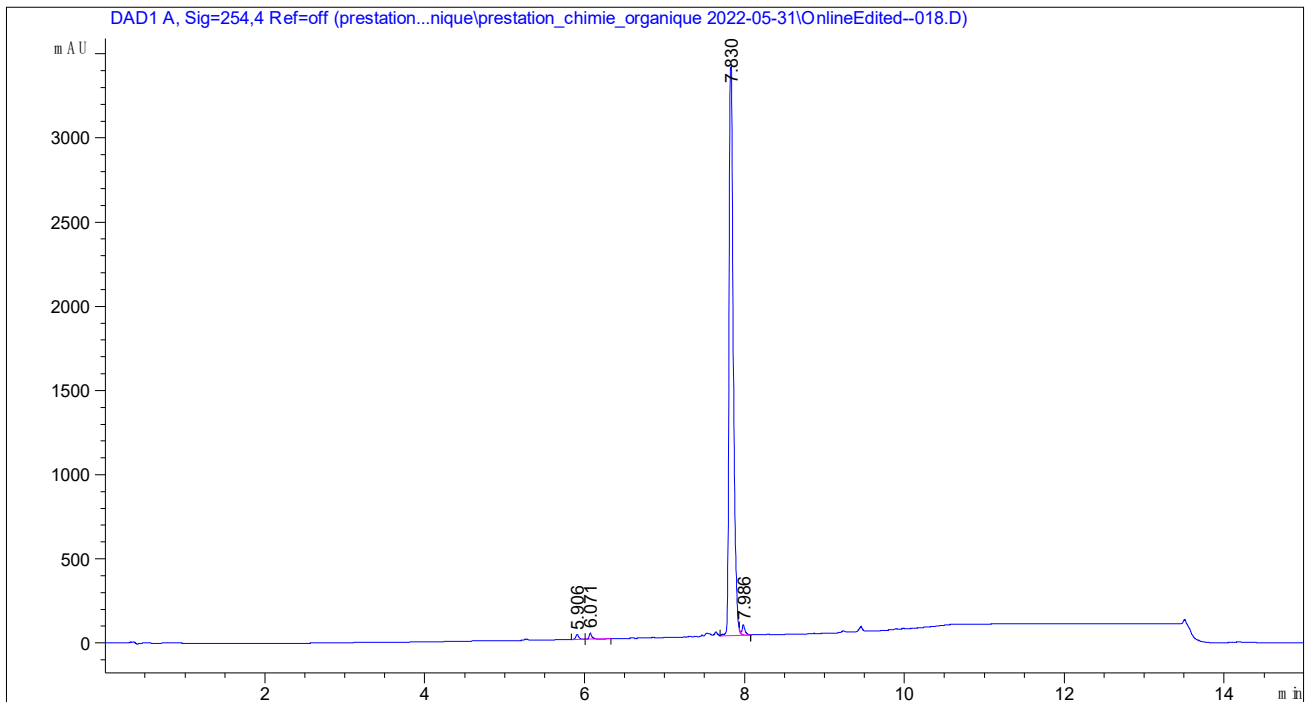

```
=====
                          Area Percent Report
=====
```

```
Sorted By      :      Signal
Multiplier     :      1.0000
Dilution       :      1.0000
Use Multiplier & Dilution Factor with ISTDs
```

Signal 1: DAD1 A, Sig=254,4 Ref=off

| Peak # | RetTime [min] | Type | Width [min] | Area [mAU*s] | Height [mAU] | Area %  |
|--------|---------------|------|-------------|--------------|--------------|---------|
| 1      | 5.906         | BV   | 0.0412      | 80.47663     | 29.15832     | 0.6037  |
| 2      | 6.071         | VV R | 0.0389      | 92.81735     | 35.06199     | 0.6962  |
| 3      | 7.830         | VV R | 0.0599      | 1.29985e4    | 3377.83521   | 97.5022 |
| 4      | 7.986         | VB E | 0.0404      | 159.69933    | 59.38504     | 1.1979  |

Totals : 1.33315e4 3501.44055

## Compound 4a

PEP37-CF3F1

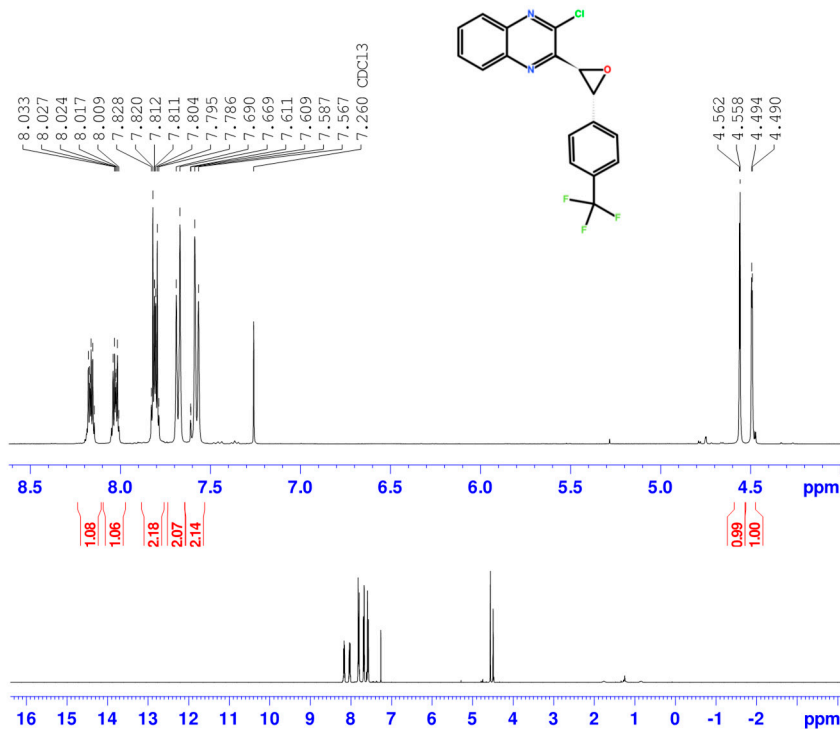

Current Data Parameters  
 NAME PEP37\_F1\_1H  
 EXPNO 10  
 PROCNO 1

F2 - Acquisition Parameters  
 Date\_ 20200619  
 Time 12.39 h  
 INSTRUM Avance NEO 400  
 PROBHD Z163739\_0130 ( )  
 PULPROG zg30  
 TD 65536  
 SOLVENT CDCl<sub>3</sub>  
 NS 16  
 DS 2  
 SWH 8196.722 Hz  
 FIDRES 0.250144 Hz  
 AQ 3.9976959 sec  
 RG 82.4935  
 DW 61.000 usec  
 DE 13.97 usec  
 TE 298.0 K  
 D1 1.00000000 sec  
 TD0 1  
 SFO1 400.1324708 MHz  
 NUC1 1H  
 P0 2.51 usec  
 P1 7.53 usec  
 PLW1 22.80999947 W

F2 - Processing parameters  
 SI 65536  
 SF 400.1300104 MHz  
 WDW EM  
 SSB 0  
 LB 0.30 Hz  
 GB 0  
 PC 1.00

PEP37-CF3F1

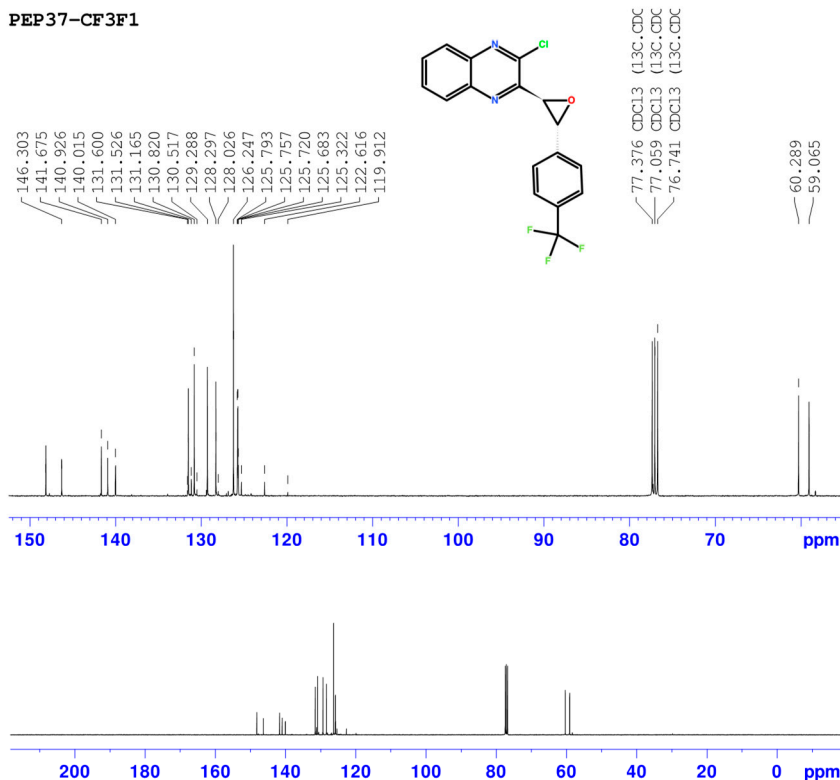

Current Data Parameters  
 NAME PEP37\_F1\_13C  
 EXPNO 9  
 PROCNO 1

F2 - Acquisition Parameters  
 Date\_ 20200623  
 Time 1.12 h  
 INSTRUM Avance NEO 400  
 PROBHD Z163739\_0130 ( )  
 PULPROG zgpg30  
 TD 65536  
 SOLVENT CDCl<sub>3</sub>  
 NS 1500  
 DS 4  
 SWH 23809.523 Hz  
 FIDRES 0.726609 Hz  
 AQ 1.3762560 sec  
 RG 101  
 DW 21.000 usec  
 DE 6.50 usec  
 TE 298.0 K  
 D1 2.00000000 sec  
 D11 0.03000000 sec  
 TD0 1  
 SFO1 100.6228298 MHz  
 NUC1 13C  
 P0 2.67 usec  
 P1 8.00 usec  
 PLW1 95.56300354 W  
 SFO2 400.1316005 MHz  
 NUC2 1H  
 CTOFPG(2) waltz65  
 PCPD2 90.00 usec  
 PLW2 22.80999947 W  
 PLW12 0.15967000 W  
 PLW13 0.08031400 W

F2 - Processing parameters  
 SI 32768  
 SF 100.6127685 MHz  
 WDW EM  
 SSB 0  
 LB 1.00 Hz  
 GB 0  
 PC 1.40

Data File C:\Chem32\...\rganique\prestation\_chimie\_organique 2022-05-31\OnlineEdited--019.D  
Sample Name: PEP37F1

```
=====
Acq. Operator   : SYSTEM                      Seq. Line :   19
Acq. Instrument : LC1290                     Location  :   P1-B9
Injection Date  : 31/5/2022 5:56:32 PM        Inj       :    1
                                           Inj Volume: 1.000 µl
Method         : C:\Chem32\1\Data\prestation_chimie_organique\prestation_chimie_organique
                2022-05-31\prestation_chimie_org.M (Sequence Method)
Last changed    : 31/5/2022 1:07:56 PM by SYSTEM
Additional Info : Peak(s) manually integrated
=====
```

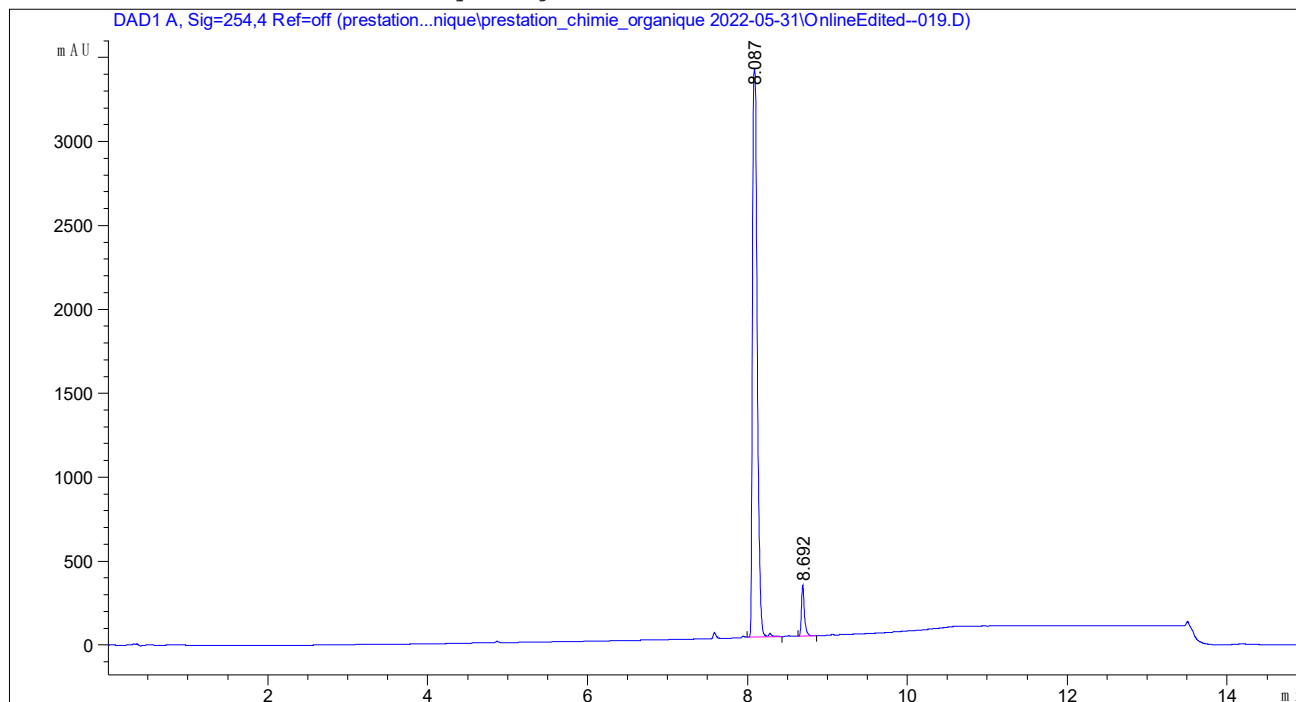

```
=====
                        Area Percent Report
=====
```

```
Sorted By      :      Signal
Multiplier     :      1.0000
Dilution       :      1.0000
Use Multiplier & Dilution Factor with ISTDs
```

Signal 1: DAD1 A, Sig=254,4 Ref=off

| Peak # | RetTime [min] | Type | Width [min] | Area [mAU*s] | Height [mAU] | Area %  |
|--------|---------------|------|-------------|--------------|--------------|---------|
| 1      | 8.087         | BV R | 0.0660      | 1.42849e4    | 3385.43384   | 94.9498 |
| 2      | 8.692         | BV R | 0.0385      | 759.79028    | 300.77063    | 5.0502  |

Totals : 1.50447e4 3686.20447

```
=====
*** End of Report ***
```

## Compound 4b

PEP37-CF3F2

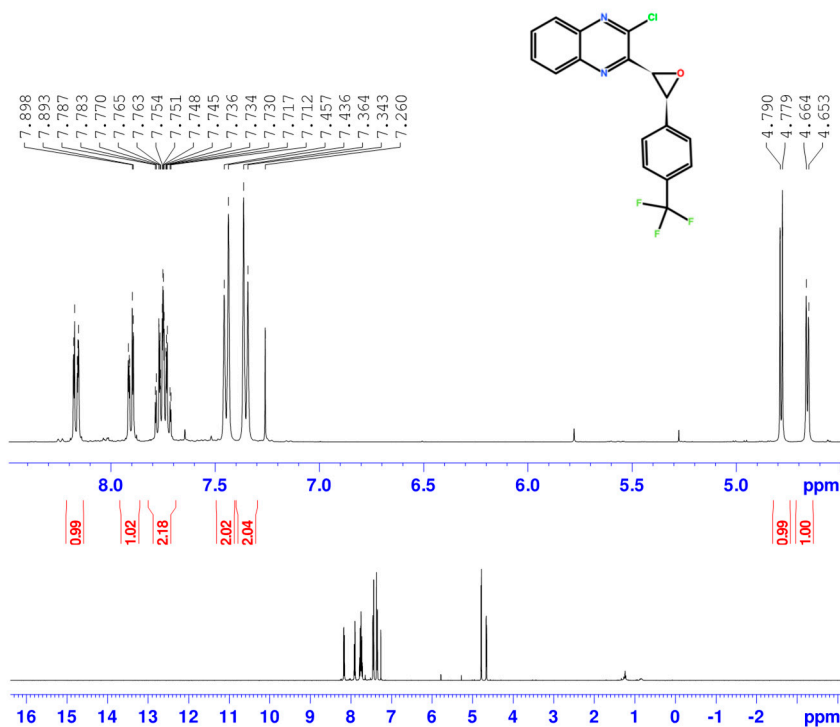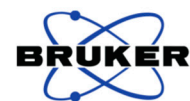

Current Data Parameters  
 NAME PEP37\_F2\_1H  
 EXPNO 10  
 PROCNO 1

F2 - Acquisition Parameters  
 Date\_ 20200619  
 Time 12.45 h  
 INSTRUM Avance NEO 400  
 PROBHD Z163739\_0130 (zg30)  
 PULPROG zg30  
 TD 65536  
 SOLVENT CDCl3  
 NS 16  
 DS 2  
 SWH 8196.722 Hz  
 FIDRES 0.250144 Hz  
 AQ 3.9976959 sec  
 RG 58.1185  
 DW 61.000 usec  
 DE 13.97 usec  
 TE 298.0 K  
 D1 1.00000000 sec  
 TDO 1  
 SFO1 400.1324708 MHz  
 NUC1 1H  
 P0 2.51 usec  
 P1 7.53 usec  
 PLW1 22.80999947 W

F2 - Processing Parameters  
 SI 65536  
 SF 400.1300103 MHz  
 WDW EM  
 SSB 0  
 LB 0.30 Hz  
 GB 0  
 PC 1.00

PEP37-CF3F2

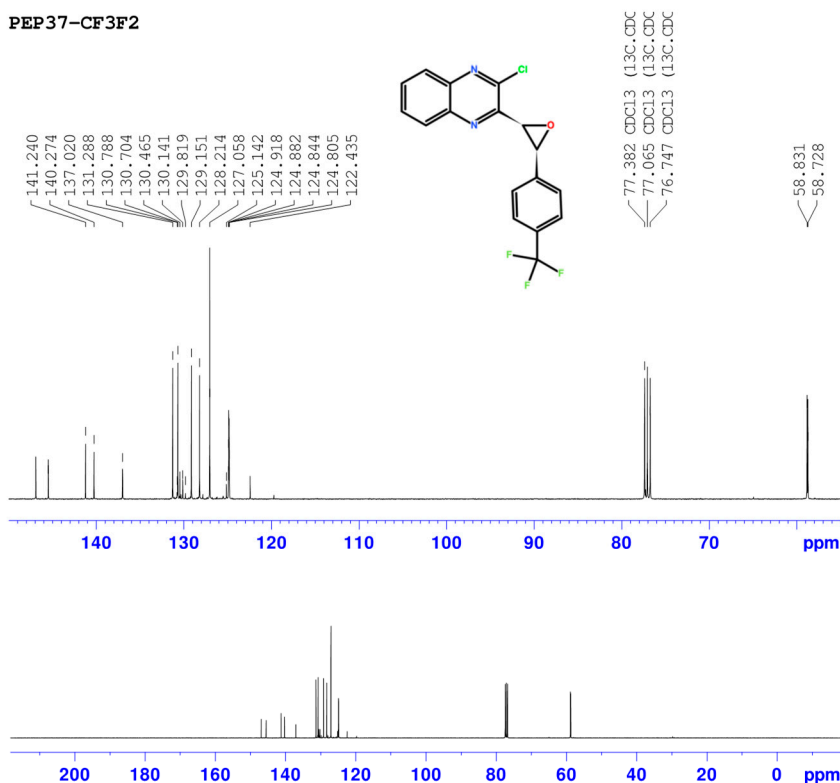

Current Data Parameters  
 NAME PEP37\_F2\_13C  
 EXPNO 11  
 PROCNO 1

F2 - Acquisition Parameters  
 Date\_ 20200623  
 Time 2.43 h  
 INSTRUM Avance NEO 400  
 PROBHD Z163739\_0130 (zgpg30)  
 PULPROG zgpg30  
 TD 65536  
 SOLVENT CDCl3  
 NS 1500  
 DS 4  
 SWH 23809.523 Hz  
 FIDRES 0.726609 Hz  
 AQ 1.3762560 sec  
 RG 101  
 DW 21.000 usec  
 DE 6.50 usec  
 TE 298.0 K  
 D1 2.00000000 sec  
 D11 0.03000000 sec  
 TDO 1  
 SFO1 100.6228298 MHz  
 NUC1 13C  
 P0 2.67 usec  
 P1 8.00 usec  
 PLW1 95.56300354 W  
 SFO2 400.1316005 MHz  
 NUC2 1H  
 CPGPRG2 waltz65  
 PCPD2 90.00 usec  
 PLW2 22.80999947 W  
 PLW12 0.15967000 W  
 PLW13 0.08031400 W

F2 - Processing parameters  
 SI 32768  
 SF 100.6127685 MHz  
 WDW EM  
 SSB 0  
 LB 1.00 Hz  
 GB 0  
 PC 1.40

Data File C:\Chem32\...\rganique\prestation\_chimie\_organique 2022-05-31\OnlineEdited--020.D  
Sample Name: PEP37F2

```
=====
Acq. Operator   : SYSTEM                      Seq. Line :   20
Acq. Instrument : LC1290                     Location  :   P1-C1
Injection Date  : 31/5/2022 6:12:17 PM        Inj       :    1
                                           Inj Volume: 1.000 µl
Method          : C:\Chem32\1\Data\prestation_chimie_organique\prestation_chimie_organique
                  2022-05-31\prestation_chimie_org.M (Sequence Method)
Last changed    : 31/5/2022 1:07:56 PM by SYSTEM
Additional Info  : Peak(s) manually integrated
=====
```

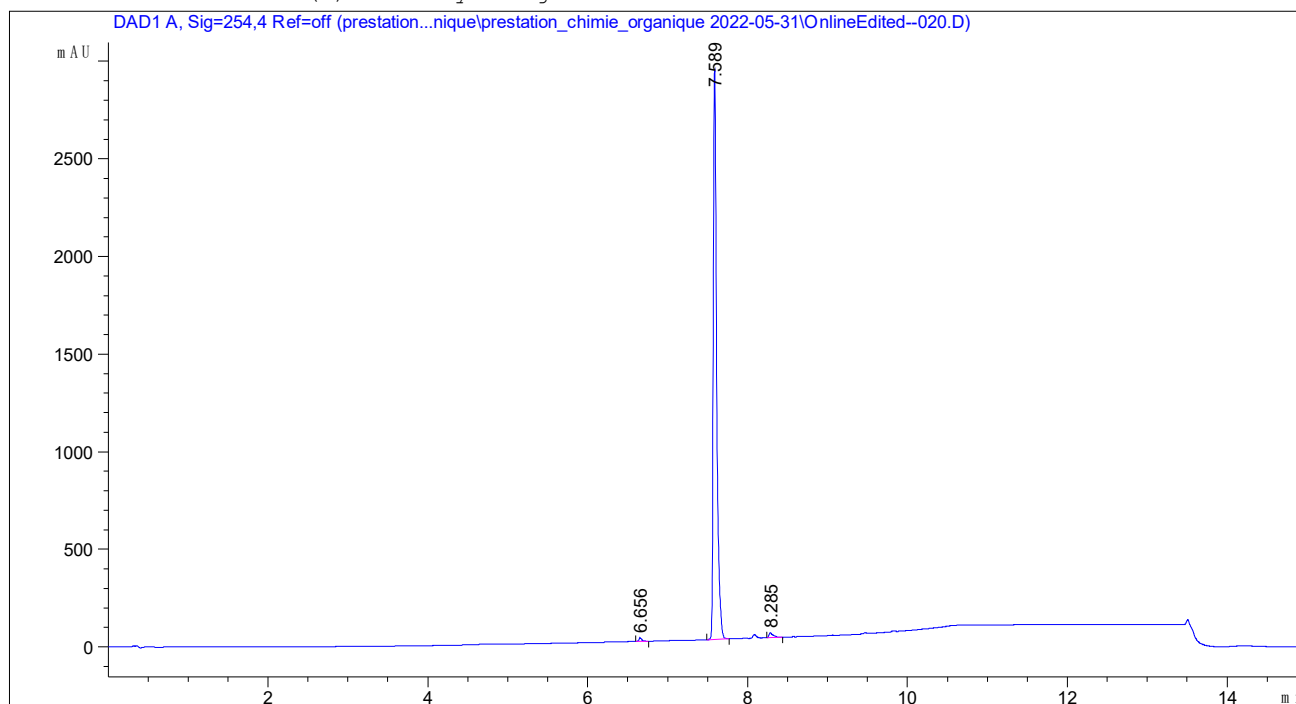

```
=====
                        Area Percent Report
=====
```

```
Sorted By           :      Signal
Multiplier           :      1.0000
Dilution             :      1.0000
Use Multiplier & Dilution Factor with ISTDs
```

Signal 1: DAD1 A, Sig=254,4 Ref=off

| Peak # | RetTime [min] | Type | Width [min] | Area [mAU*s] | Height [mAU] | Area %  |
|--------|---------------|------|-------------|--------------|--------------|---------|
| 1      | 6.656         | BB   | 0.0385      | 48.42534     | 18.51770     | 0.5551  |
| 2      | 7.589         | BB   | 0.0443      | 8580.26172   | 2918.09277   | 98.3610 |
| 3      | 8.285         | BV R | 0.0511      | 94.55002     | 25.56572     | 1.0839  |

Totals :                      8723.23708 2962.17620

```
=====
*** End of Report ***
```

## Compound 5a

PEP04F1

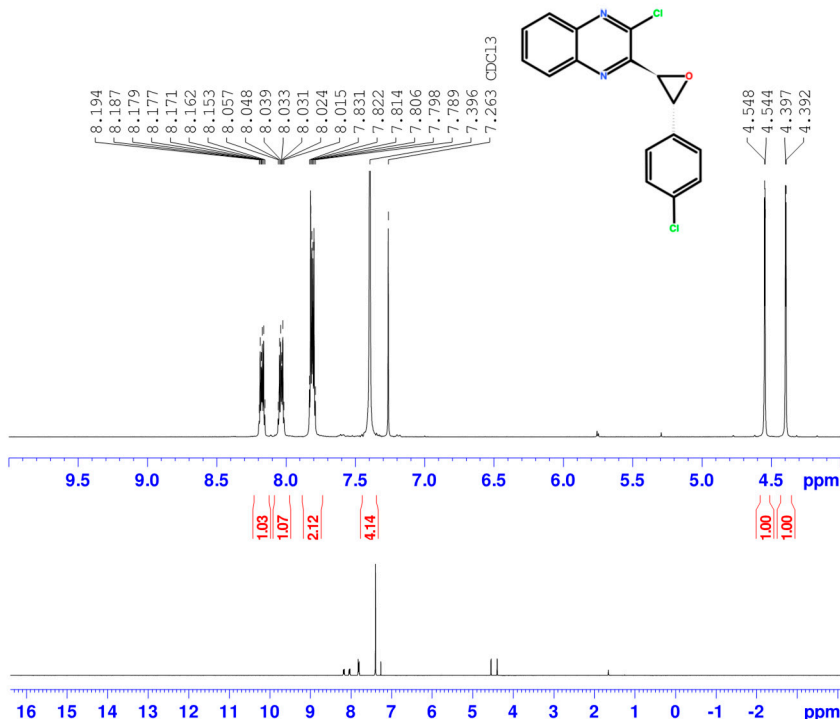

Current Data Parameters  
 NAME PEP04\_F1\_1H  
 EXPNO 30  
 PROCNO 1

F2 - Acquisition Parameters  
 Date\_ 20200610  
 Time 16.18 h  
 INSTRUM Avance NEO 400  
 PROBHD Z163739\_0130 (zg30)  
 PULPROG zg30  
 TD 65536  
 SOLVENT CDCl<sub>3</sub>  
 NS 16  
 DS 2  
 SWH 8196.722 Hz  
 FIDRES 0.250144 Hz  
 AQ 3.9976959 sec  
 RG 101  
 DW 61.000 usec  
 DE 13.97 usec  
 TE 298.0 K  
 D1 1.00000000 sec  
 TD0 1  
 SFO1 400.1324708 MHz  
 NUC1 <sup>1</sup>H  
 P0 2.51 usec  
 P1 7.53 usec  
 PLW1 22.80999947 W

F2 - Processing Parameters  
 SI 65536  
 SF 400.1300094 MHz  
 WDW EM  
 SSB 0  
 LB 0.30 Hz  
 GB 0  
 PC 1.00

PEP04F1

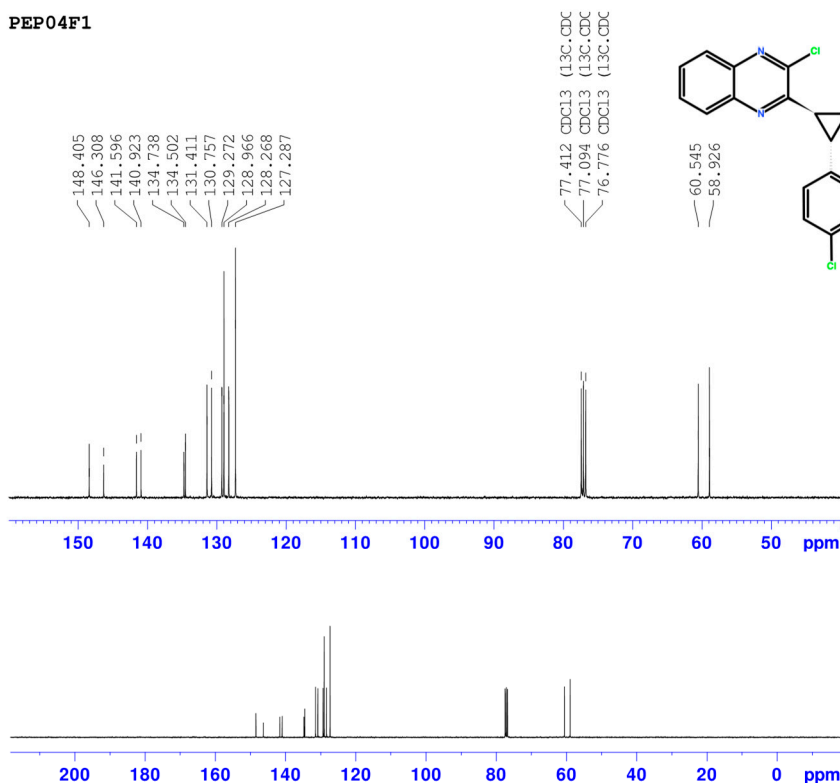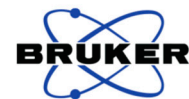

Current Data Parameters  
 NAME PEP04\_F1\_13C  
 EXPNO 20  
 PROCNO 1

F2 - Acquisition Parameters  
 Date\_ 20200612  
 Time 10.33 h  
 INSTRUM Avance NEO 400  
 PROBHD Z163739\_0130 (zgpg30)  
 PULPROG zgpg30  
 TD 65536  
 SOLVENT CDCl<sub>3</sub>  
 NS 168  
 DS 4  
 SWH 23809.523 Hz  
 FIDRES 0.726609 Hz  
 AQ 1.3762660 sec  
 RG 101  
 DW 21.000 usec  
 DE 6.50 usec  
 TE 298.0 K  
 D1 2.00000000 sec  
 D11 0.03000000 sec  
 TD0 1  
 SFO1 100.6228298 MHz  
 NUC1 <sup>13</sup>C  
 P0 2.67 usec  
 P1 8.00 usec  
 PLW1 95.56300354 W  
 SFO2 400.1316005 MHz  
 NUC2 <sup>1</sup>H  
 CPGPRG2 waltz16  
 PCPD2 90.00 usec  
 PLW2 22.80999947 W  
 PLW12 0.15967000 W  
 PLW13 0.08031400 W

F2 - Processing parameters  
 SI 32768  
 SF 100.6127685 MHz  
 WDW EM  
 SSB 0  
 LB 1.00 Hz  
 GB 0  
 PC 1.40



Data File C:\Chem32\...rganique\prestation\_chimie\_organique 2022-05-31\OnlineEdited--003.D  
Sample Name: PEP04F1

```
=====
Acq. Operator   : SYSTEM                      Seq. Line :    3
Acq. Instrument : LC1290                     Location  :   P1-A2
Injection Date  : 31/5/2022 1:40:30 PM        Inj       :    1
                                           Inj Volume: 1.000 µl
Method          : C:\Chem32\1\Data\prestation_chimie_organique\prestation_chimie_organique
                  2022-05-31\prestation_chimie_org.M (Sequence Method)
Last changed    : 31/5/2022 1:07:56 PM by SYSTEM
Additional Info : Peak(s) manually integrated
=====
```

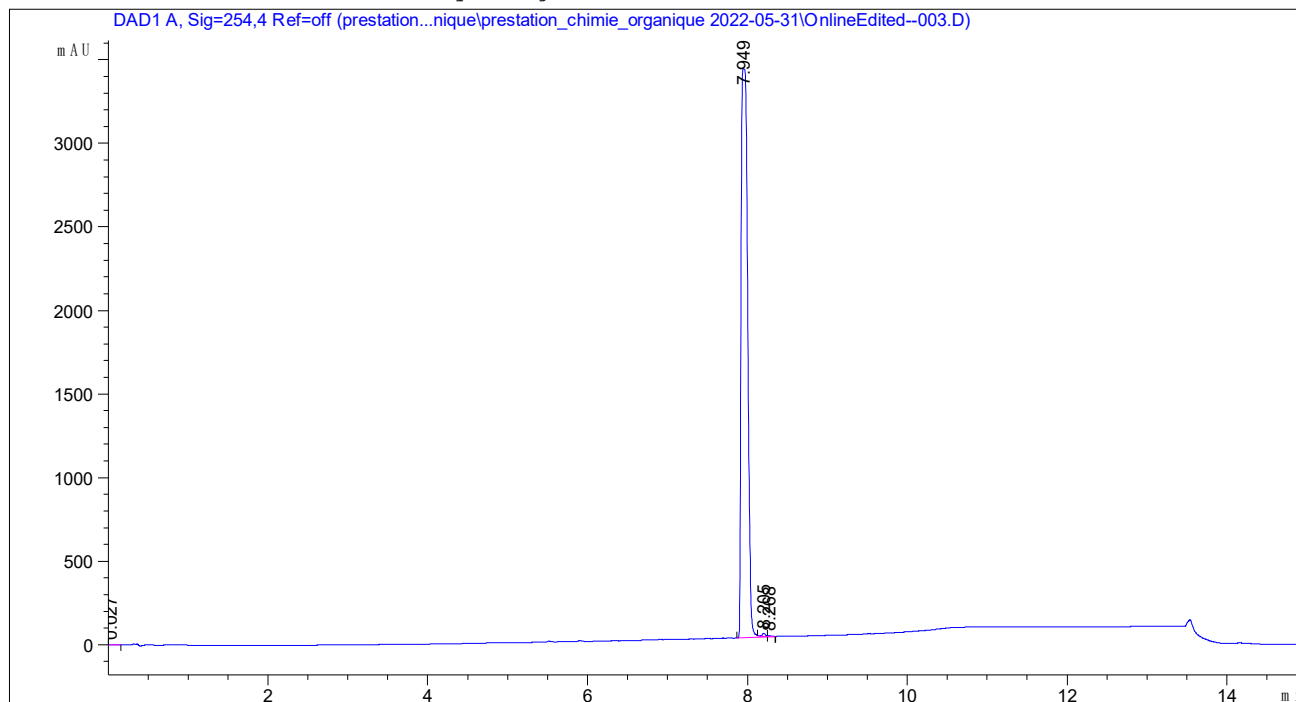

=====  
Area Percent Report  
=====

```
Sorted By      :      Signal
Multiplier     :      1.0000
Dilution       :      1.0000
Use Multiplier & Dilution Factor with ISTDs
```

Signal 1: DAD1 A, Sig=254,4 Ref=off

| Peak # | RetTime [min] | Type | Width [min] | Area [mAU*s] | Height [mAU] | Area %  |
|--------|---------------|------|-------------|--------------|--------------|---------|
| 1      | 0.027         | BB   | 0.0446      | 5.80733      | 1.85338      | 0.0309  |
| 2      | 7.949         | BV R | 0.0731      | 1.87015e4    | 3402.69727   | 99.5685 |
| 3      | 8.205         | VV E | 0.0425      | 54.93636     | 19.11710     | 0.2925  |
| 4      | 8.268         | VB E | 0.0388      | 20.29902     | 7.45067      | 0.1081  |

Totals :                      1.87826e4   3431.11842

## Compound 5b

2022-06-03

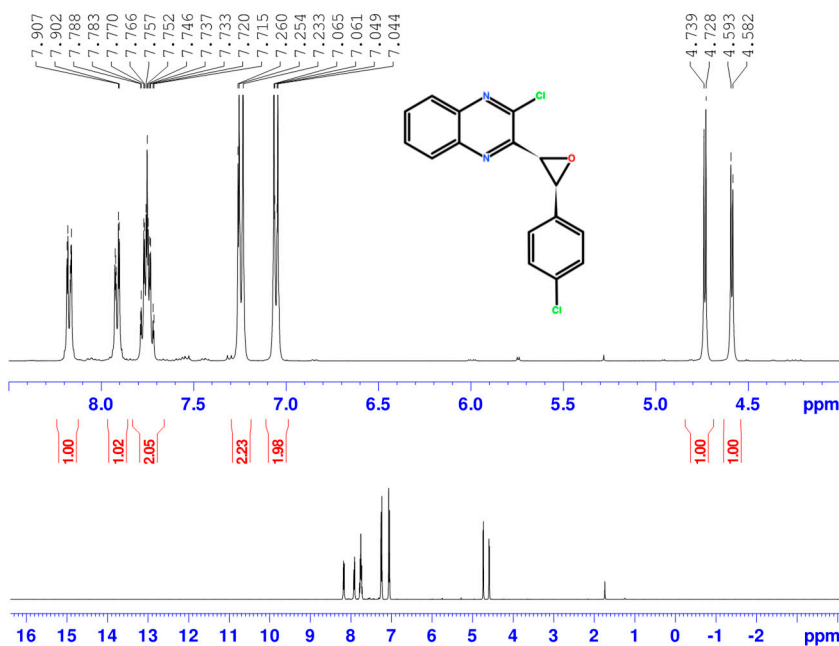

Current Data Parameters  
 NAME PEP04\_F2\_1H  
 EXPNO 40  
 PROCNO 1

F2 - Acquisition Parameters  
 Date\_ 20220603  
 Time 10.32 h  
 INSTRUM Avance NEO 400  
 PROBHD Z163739\_0130 (zgc30)  
 PULPROG zg30  
 TD 65536  
 SOLVENT CDCl3  
 NS 16  
 DS 2  
 SWH 8196.722 Hz  
 FIDRES 0.250144 Hz  
 AQ 3.9976959 sec  
 RG 96.5778  
 DW 61.000 usec  
 DE 13.97 usec  
 TE 298.0 K  
 D1 1.00000000 sec  
 TD0 1  
 SFO1 400.1324708 MHz  
 NUC1 1H  
 P0 2.51 usec  
 P1 7.53 usec  
 PLW1 22.80999947 W

F2 - Processing parameters  
 SI 65536  
 SF 400.1300106 MHz  
 WDW EM  
 SSB 0  
 LB 0.30 Hz  
 GB 0  
 PC 1.00

PEP04F2

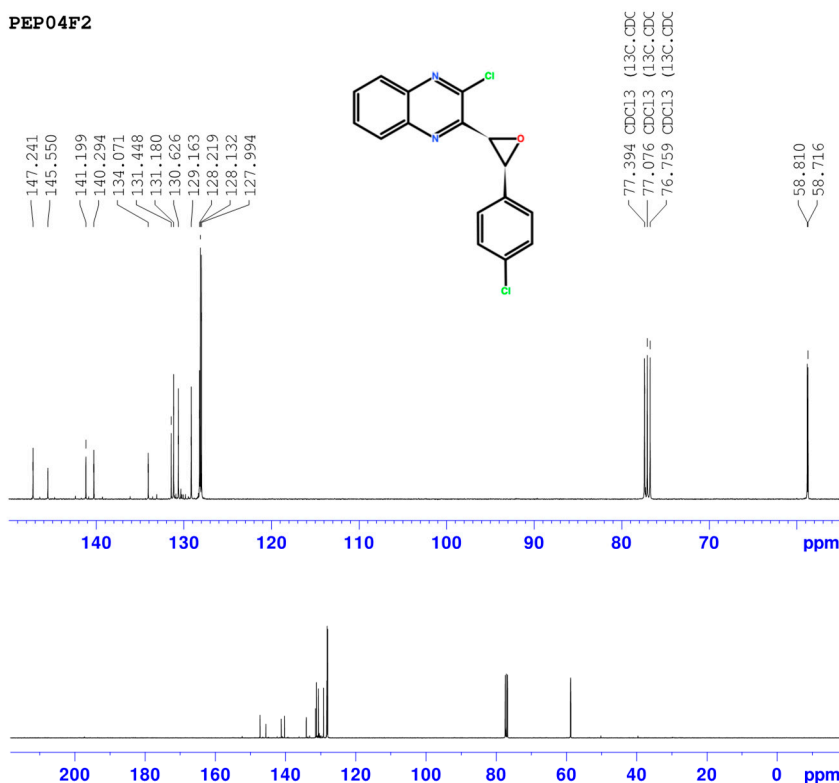

Current Data Parameters  
 NAME PEP04\_F2\_13C  
 EXPNO 20  
 PROCNO 1

F2 - Acquisition Parameters  
 Date\_ 20200611  
 Time 4.22 h  
 INSTRUM Avance NEO 400  
 PROBHD Z163739\_0130 (zgc30)  
 PULPROG zgpg30  
 TD 65536  
 SOLVENT CDCl3  
 NS 2048  
 DS 4  
 SWH 23809.523 Hz  
 FIDRES 0.726609 Hz  
 AQ 1.3762560 sec  
 RG 101  
 DW 21.000 usec  
 DE 6.50 usec  
 TE 298.0 K  
 D1 2.00000000 sec  
 D11 0.03000000 sec  
 TD0 1  
 SFO1 100.628298 MHz  
 NUC1 13C  
 P0 2.67 usec  
 P1 8.00 usec  
 PLW1 95.56300354 W  
 SFO2 400.1316005 MHz  
 NUC2 1H  
 CPGPRG2 waltz65  
 PCPD2 90.00 usec  
 PLW2 22.80999947 W  
 PLW12 0.15967000 W  
 PLW13 0.08031400 W

F2 - Processing parameters  
 SI 32768  
 SF 100.6127685 MHz  
 WDW EM  
 SSB 0  
 LB 1.00 Hz  
 GB 0  
 PC 1.40

## Compound 6a

PEP06F1

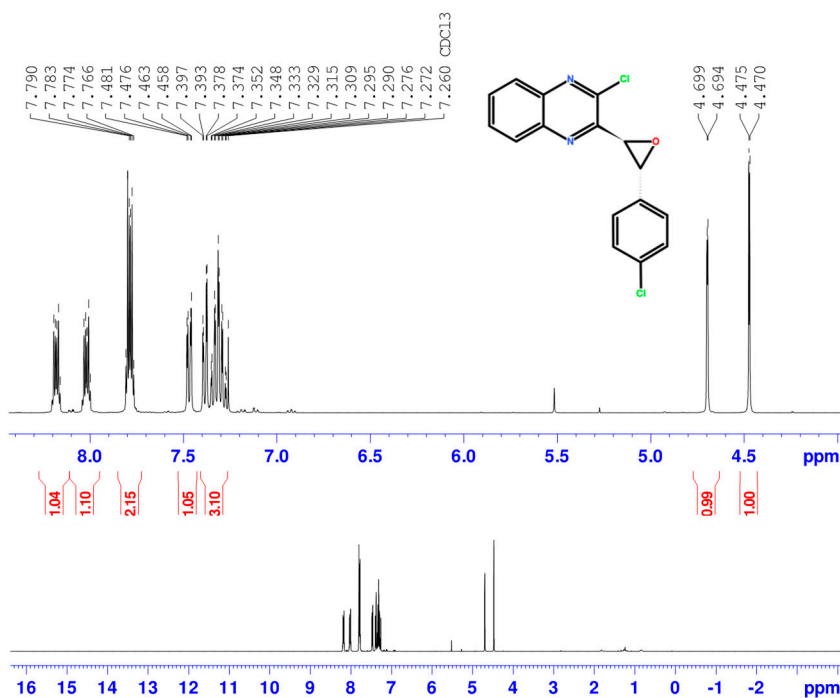

PEP06F1

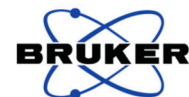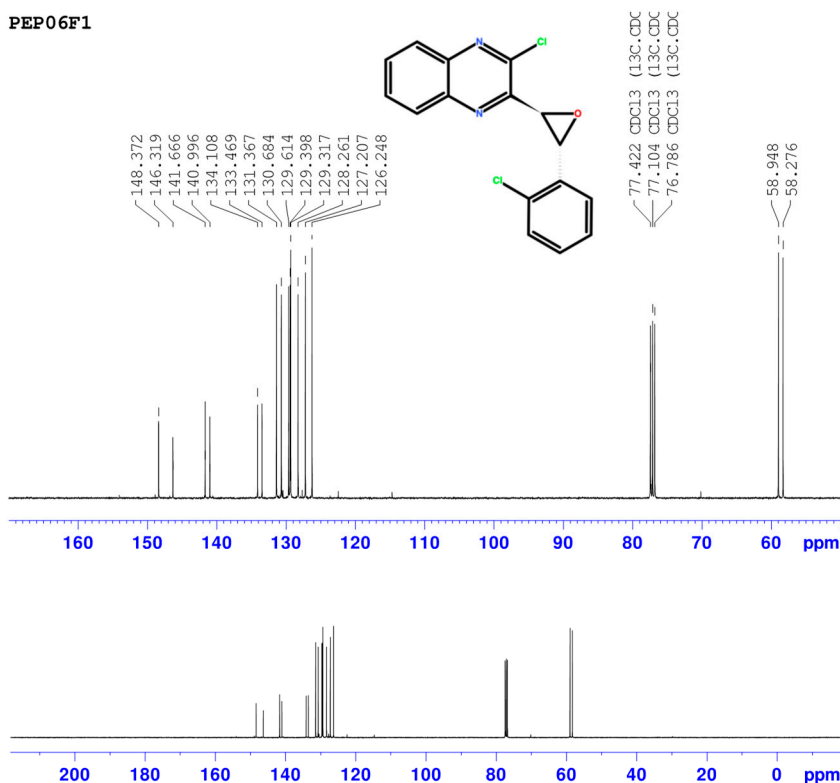

Data File C:\Chem32\...\rganique\prestation\_chimie\_organique 2022-05-31\OnlineEdited--007.D  
Sample Name: PEP06F1

```
=====
Acq. Operator   : SYSTEM                      Seq. Line :    7
Acq. Instrument : LC1290                     Location  :   P1-A6
Injection Date  : 31/5/2022 2:43:40 PM        Inj       :    1
                                           Inj Volume: 1.000 µl
Method         : C:\Chem32\1\Data\prestation_chimie_organique\prestation_chimie_organique
                2022-05-31\prestation_chimie_org.M (Sequence Method)
Last changed    : 31/5/2022 1:07:56 PM by SYSTEM
Additional Info : Peak(s) manually integrated
=====
```

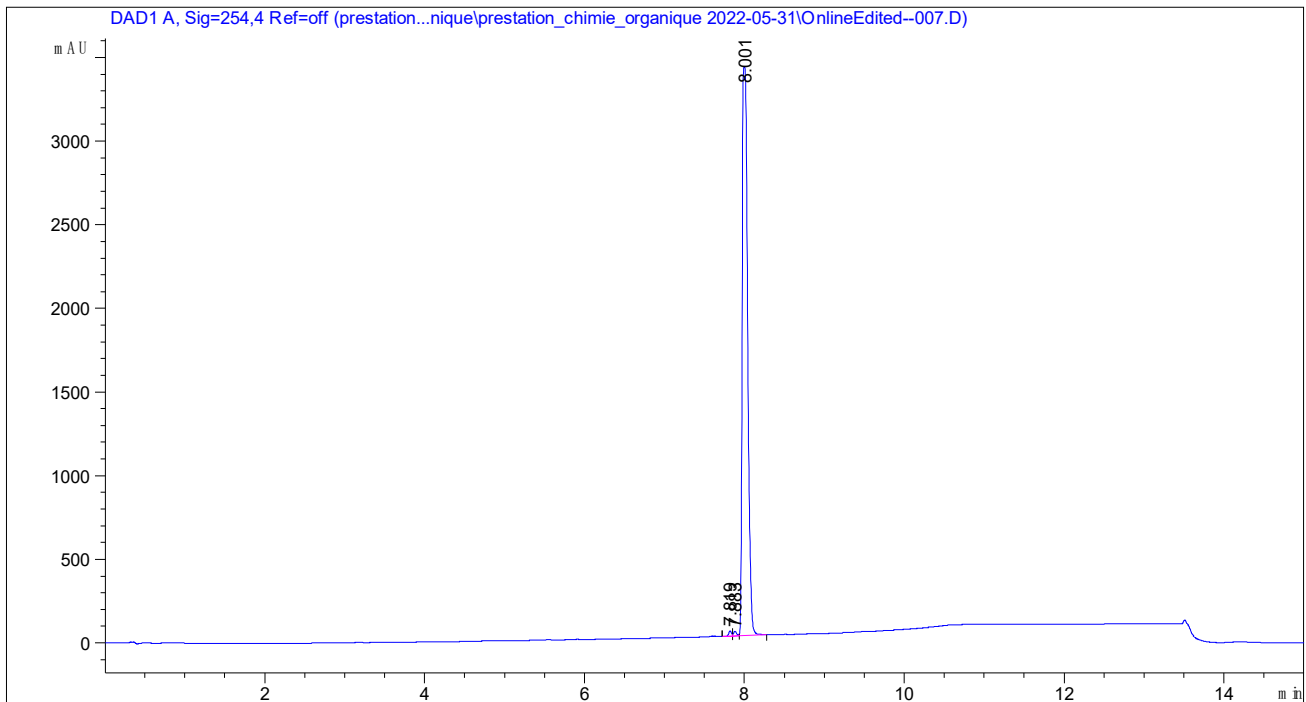

```
=====
                        Area Percent Report
=====
```

```
Sorted By           :      Signal
Multiplier          :      1.0000
Dilution            :      1.0000
Use Multiplier & Dilution Factor with ISTDs
```

Signal 1: DAD1 A, Sig=254,4 Ref=off

| Peak # | RetTime [min] | Type | Width [min] | Area [mAU*s] | Height [mAU] | Area %  |
|--------|---------------|------|-------------|--------------|--------------|---------|
| 1      | 7.819         | BV E | 0.0357      | 79.28677     | 33.43105     | 0.4858  |
| 2      | 7.883         | VV E | 0.0394      | 75.01073     | 28.80846     | 0.4596  |
| 3      | 8.001         | VB R | 0.0755      | 1.61668e4    | 3400.07349   | 99.0546 |

Totals : 1.63211e4 3462.31299

```
=====
*** End of Report ***
```

## Compound 7a

PEP08 4Ftrans

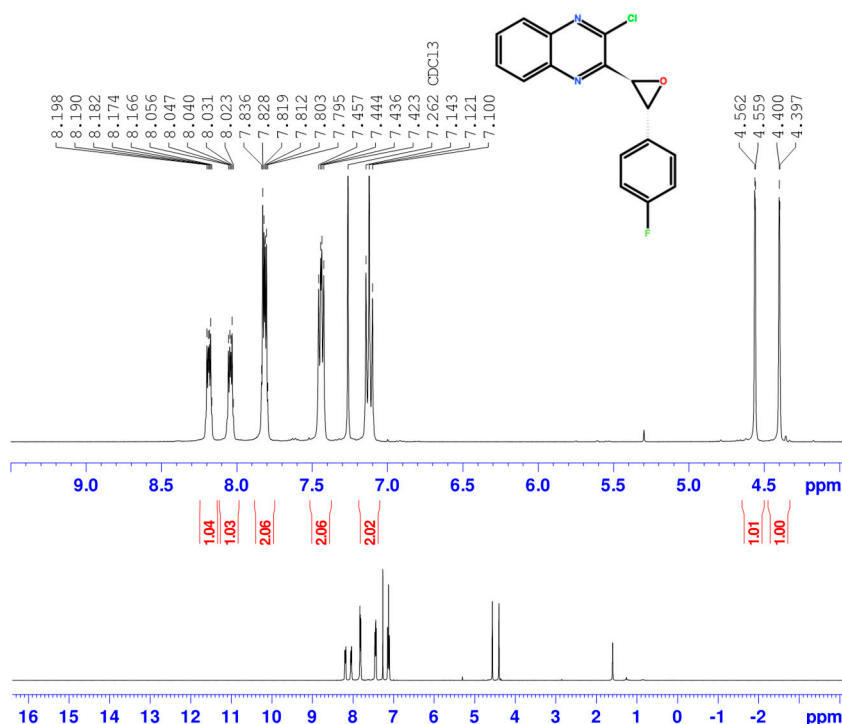

Current Data Parameters  
 NAME PEP08\_F1\_1H  
 EXPNO 10  
 PROCNO 1

F2 - Acquisition Parameters  
 Date\_ 20200611  
 Time 11.02 h  
 INSTRUM Avance NEO 400  
 PROBHD Z163739\_0130 ( )  
 PULPROG zg30  
 TD 65536  
 SOLVENT CDCl<sub>3</sub>  
 NS 16  
 DS 2  
 SWH 8196.722 Hz  
 FIDRES 0.250144 Hz  
 AQ 3.9976959 sec  
 RG 101  
 DW 61.000 usec  
 DE 13.97 usec  
 TE 298.0 K  
 D1 1.00000000 sec  
 TD0 1  
 SFO1 400.1324708 MHz  
 NUC1 1H  
 P0 2.51 usec  
 P1 7.53 usec  
 PLW1 22.80999947 W

F2 - Processing parameters  
 SI 65536  
 SF 400.1300097 MHz  
 WDW EM  
 SSB 0  
 LB 0.30 Hz  
 GB 0  
 PC 1.00

PEP08-4Ftrans

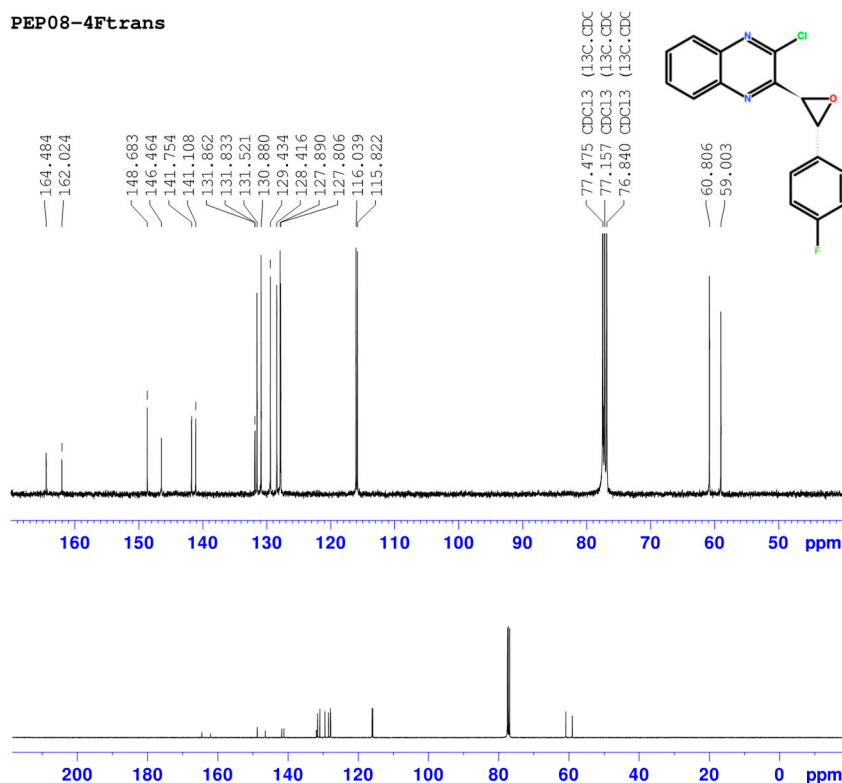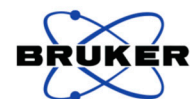

Current Data Parameters  
 NAME PEP08\_F1\_13C  
 EXPNO 20  
 PROCNO 1

F2 - Acquisition Parameters  
 Date\_ 20200613  
 Time 6.05 h  
 INSTRUM Avance NEO 400  
 PROBHD Z163739\_0130 ( )  
 PULPROG zgpg30  
 TD 65536  
 SOLVENT CDCl<sub>3</sub>  
 NS 2500  
 DS 4  
 SWH 23809.523 Hz  
 FIDRES 0.726609 Hz  
 AQ 1.3762560 sec  
 RG 101  
 DW 21.000 usec  
 DE 6.50 usec  
 TE 298.0 K  
 D1 2.00000000 sec  
 D11 0.03000000 sec  
 TD0 1  
 SFO1 100.6228298 MHz  
 NUC1 13C  
 P0 2.67 usec  
 P1 8.00 usec  
 PLW1 95.56300354 W  
 SFO2 400.1316005 MHz  
 NUC2 1H  
 CTOFPG(2) waltz65  
 PCPD2 90.00 usec  
 PLW2 22.80999947 W  
 PLW12 0.15967000 W  
 PLW13 0.08031400 W

F2 - Processing parameters  
 SI 32768  
 SF 100.6127559 MHz  
 WDW EM  
 SSB 0  
 LB 1.00 Hz  
 GB 0  
 PC 1.40

## Compound 7b

PEP08 4Fcis

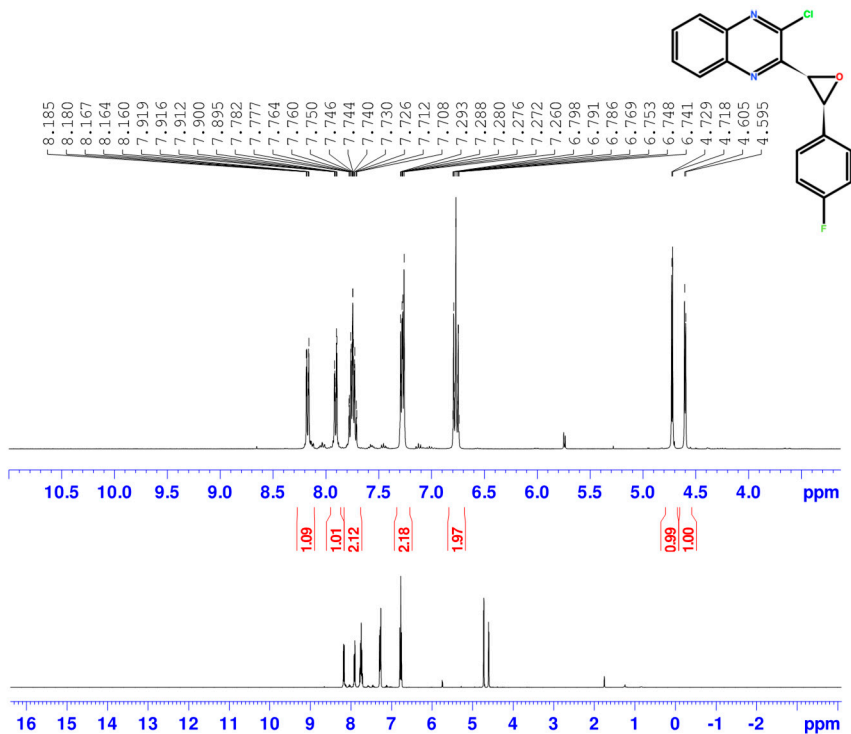

Current Data Parameters  
 NAME PEP08\_F2\_1H  
 EXPNO 10  
 PROCNO 1

F2 - Acquisition Parameters  
 Date\_ 20200611  
 Time 10.55 h  
 INSTRUM Avance NEO 400  
 PROBHD Z163739\_0130 (zg30)  
 PULPROG zg30  
 TD 65536  
 SOLVENT CDCl3  
 NS 16  
 DS 2  
 SWH 8196.722 Hz  
 FIDRES 0.250144 Hz  
 AQ 3.9976959 sec  
 RG 85.0051  
 DW 61.000 usec  
 DE 13.97 usec  
 TE 298.0 K  
 D1 1.00000000 sec  
 TD0 1  
 SFO1 400.1324708 MHz  
 NUC1 1H  
 P0 2.51 usec  
 P1 7.53 usec  
 PLW1 22.80999947 W

F2 - Processing Parameters  
 SI 65536  
 SF 400.1300102 MHz  
 WDW EM  
 SSB 0  
 LB 0.30 Hz  
 GB 0  
 PC 1.00

PEP08-4Fcis

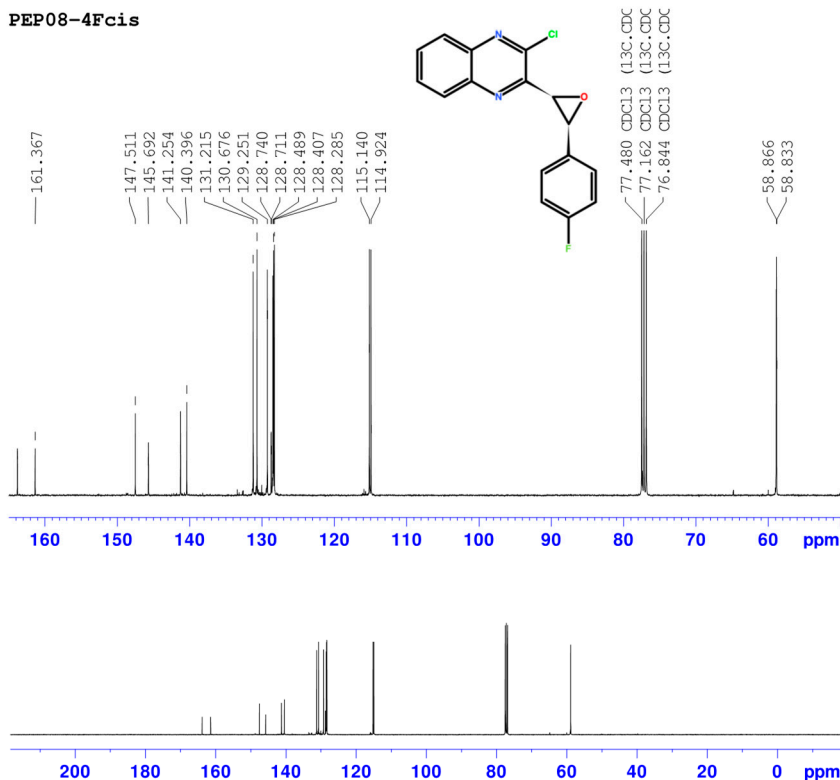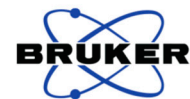

Current Data Parameters  
 NAME PEP08\_F2\_13C  
 EXPNO 20  
 PROCNO 1

F2 - Acquisition Parameters  
 Date\_ 20200613  
 Time 3.36 h  
 INSTRUM Avance NEO 400  
 PROBHD Z163739\_0130 (zgpg30)  
 PULPROG zgpg30  
 TD 65536  
 SOLVENT CDCl3  
 NS 2500  
 DS 4  
 SWH 23809.523 Hz  
 FIDRES 0.726609 Hz  
 AQ 1.3762560 sec  
 RG 101  
 DW 21.000 usec  
 DE 6.50 usec  
 TE 298.0 K  
 D1 2.00000000 sec  
 D11 0.03000000 sec  
 TD0 1  
 SFO1 100.6228298 MHz  
 NUC1 13C  
 P0 2.67 usec  
 P1 8.00 usec  
 PLW1 95.56300354 W  
 SFO2 400.1316005 MHz  
 NUC2 1H  
 CPGPRG2 waltz65  
 PCPD2 90.00 usec  
 PLW2 22.80999947 W  
 PLW12 0.15967000 W  
 PLW13 0.08031400 W

F2 - Processing parameters  
 SI 32768  
 SF 100.6127591 MHz  
 WDW EM  
 SSB 0  
 LB 1.00 Hz  
 GB 0  
 PC 1.40

Data File C:\Chem32\...rganique\prestation\_chimie\_organique 2022-05-31\OnlineEdited--011.D  
Sample Name: PEP08F2

```
=====
Acq. Operator   : SYSTEM                      Seq. Line :   11
Acq. Instrument : LC1290                     Location  :   P1-B1
Injection Date  : 31/5/2022 3:46:47 PM        Inj       :    1
                                           Inj Volume: 1.000 µl
Method         : C:\Chem32\1\Data\prestation_chimie_organique\prestation_chimie_organique
                  2022-05-31\prestation_chimie_org.M (Sequence Method)
Last changed    : 31/5/2022 1:07:56 PM by SYSTEM
Additional Info : Peak(s) manually integrated
=====
```

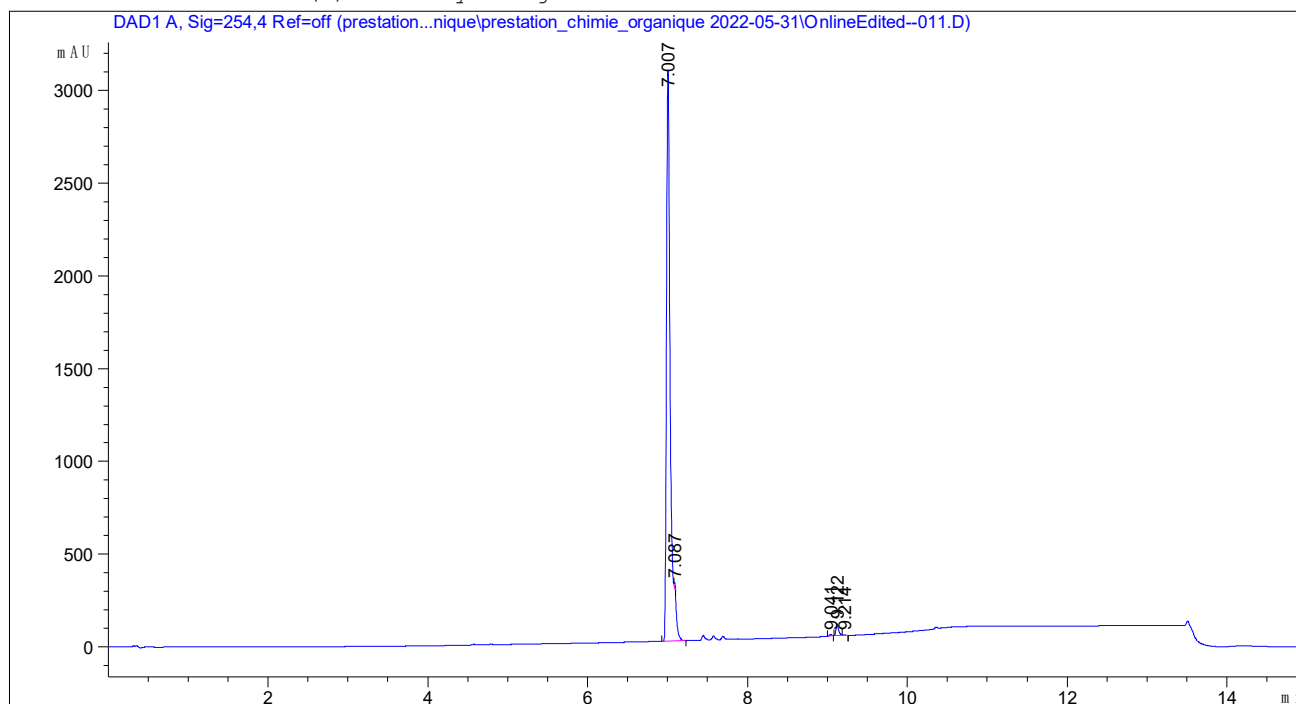

=====  
Area Percent Report  
=====

```
Sorted By      :      Signal
Multiplier     :      1.0000
Dilution       :      1.0000
Use Multiplier & Dilution Factor with ISTDs
```

Signal 1: DAD1 A, Sig=254,4 Ref=off

| Peak # | RetTime [min] | Type | Width [min] | Area [mAU*s] | Height [mAU] | Area %  |
|--------|---------------|------|-------------|--------------|--------------|---------|
| 1      | 7.007         | BV R | 0.0486      | 9923.04688   | 3075.07031   | 98.0261 |
| 2      | 7.087         | VB E | 0.0170      | 19.77497     | 23.11082     | 0.1953  |
| 3      | 9.041         | BB   | 0.0340      | 19.14015     | 8.91607      | 0.1891  |
| 4      | 9.122         | BV R | 0.0365      | 155.43683    | 63.62344     | 1.5355  |
| 5      | 9.214         | VB E | 0.0297      | 5.46008      | 2.80016      | 0.0539  |

Totals : 1.01229e4 3173.52080

## Compound 8a

PEP09F1 2022-03-03

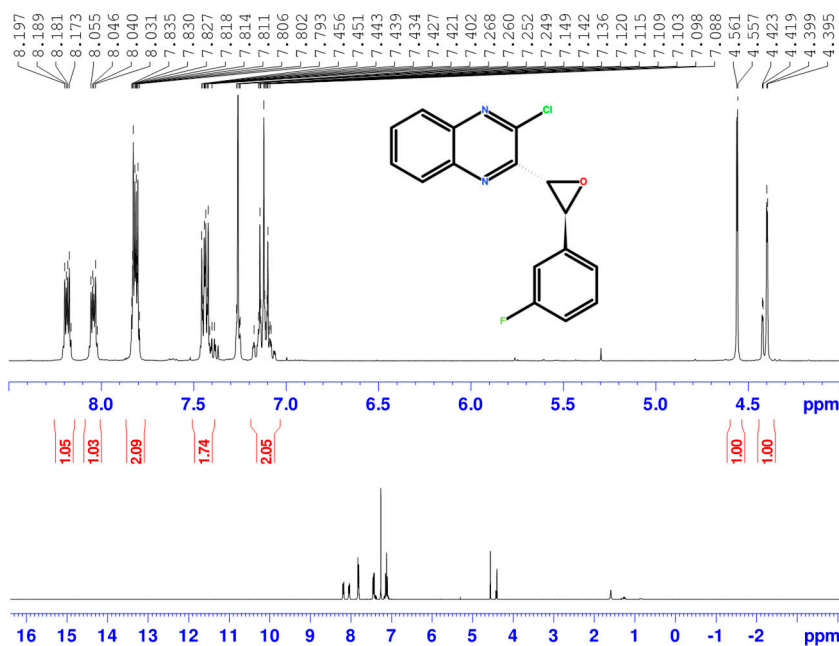

Current Data Parameters

NAME PEP09\_F1\_1H  
EXPNO 20  
PROCNO 1

F2 - Acquisition Parameters

Date\_ 20220303  
Time 12.18 h  
INSTRUM Avance NEO 400  
PROBHD Z163739\_0130 (zg30)  
PULPROG zg30  
TD 65536  
SOLVENT CDCl3  
NS 16  
DS 2  
SWH 8196.722 Hz  
FIDRES 0.250144 Hz  
AQ 3.9976959 sec  
RG 101  
DW 61.000 usec  
DE 13.97 usec  
TE 298.0 K  
D1 1.00000000 sec  
TD0 1  
SFO1 400.1324708 MHz  
NUC1 1H  
P0 2.51 usec  
P1 7.53 usec  
PLW1 22.80999947 W

F2 - Processing Parameters

SI 65536  
SF 400.1300103 MHz  
WDW EM  
SSB 0  
LB 0.30 Hz  
GB 0  
PC 1.00

PEP09F1

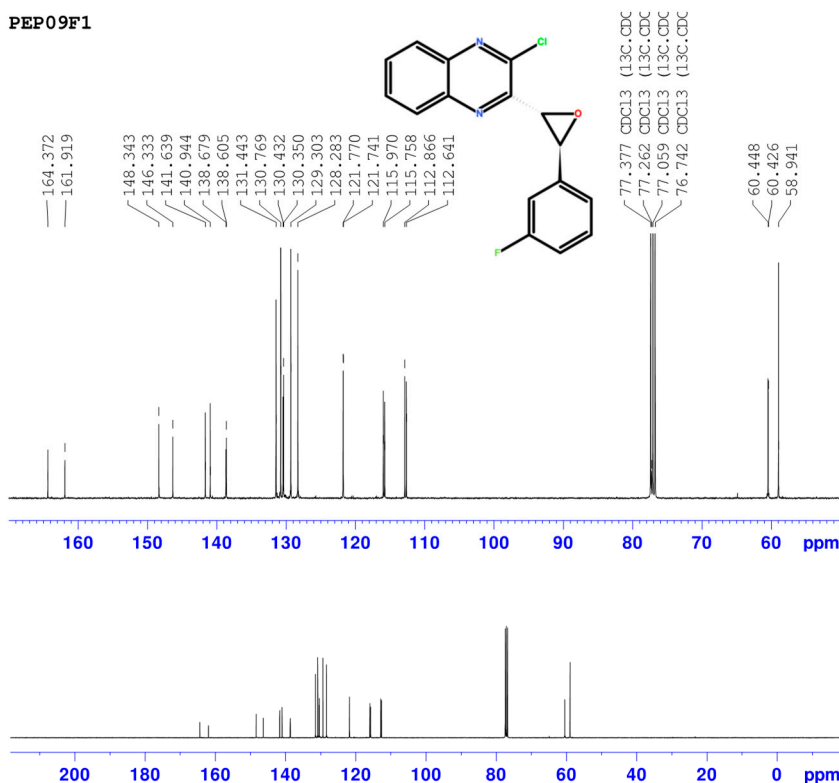

Current Data Parameters

NAME PEP09\_F1\_13C  
EXPNO 20  
PROCNO 1

F2 - Acquisition Parameters

Date\_ 20200614  
Time 6.12 h  
INSTRUM Avance NEO 400  
PROBHD Z163739\_0130 (zgpg30)  
PULPROG zgpg30  
TD 65536  
SOLVENT CDCl3  
NS 3000  
DS 4  
SWH 23809.523 Hz  
FIDRES 0.726609 Hz  
AQ 1.3762560 sec  
RG 101  
DW 21.000 usec  
DE 6.50 usec  
TE 298.0 K  
D1 2.00000000 sec  
D11 0.03000000 sec  
TD0 1  
SFO1 100.6228298 MHz  
NUC1 13C  
P0 2.67 usec  
P1 8.00 usec  
PLW1 95.56300354 W  
SFO2 400.1316005 MHz  
NUC2 1H  
CPOPRG(2) waltz65  
PCPD2 90.00 usec  
PLM2 22.80999947 W  
PLM12 0.15967000 W  
PLM13 0.08031400 W

F2 - Processing parameters

SI 32768  
SF 100.6127685 MHz  
WDW EM  
SSB 0  
LB 1.00 Hz  
GB 0  
PC 1.40



Data File C:\Chem32\...rganique\prestation\_chimie\_organique 2022-05-31\OnlineEdited--012.D  
Sample Name: PEP09F1

```
=====
Acq. Operator   : SYSTEM                      Seq. Line :   12
Acq. Instrument : LC1290                     Location  :   P1-B2
Injection Date  : 31/5/2022 4:02:45 PM        Inj       :    1
                                           Inj Volume: 1.000 µl
Method          : C:\Chem32\1\Data\prestation_chimie_organique\prestation_chimie_organique
                  2022-05-31\prestation_chimie_org.M (Sequence Method)
Last changed    : 31/5/2022 1:07:56 PM by SYSTEM
Additional Info  : Peak(s) manually integrated
=====
```

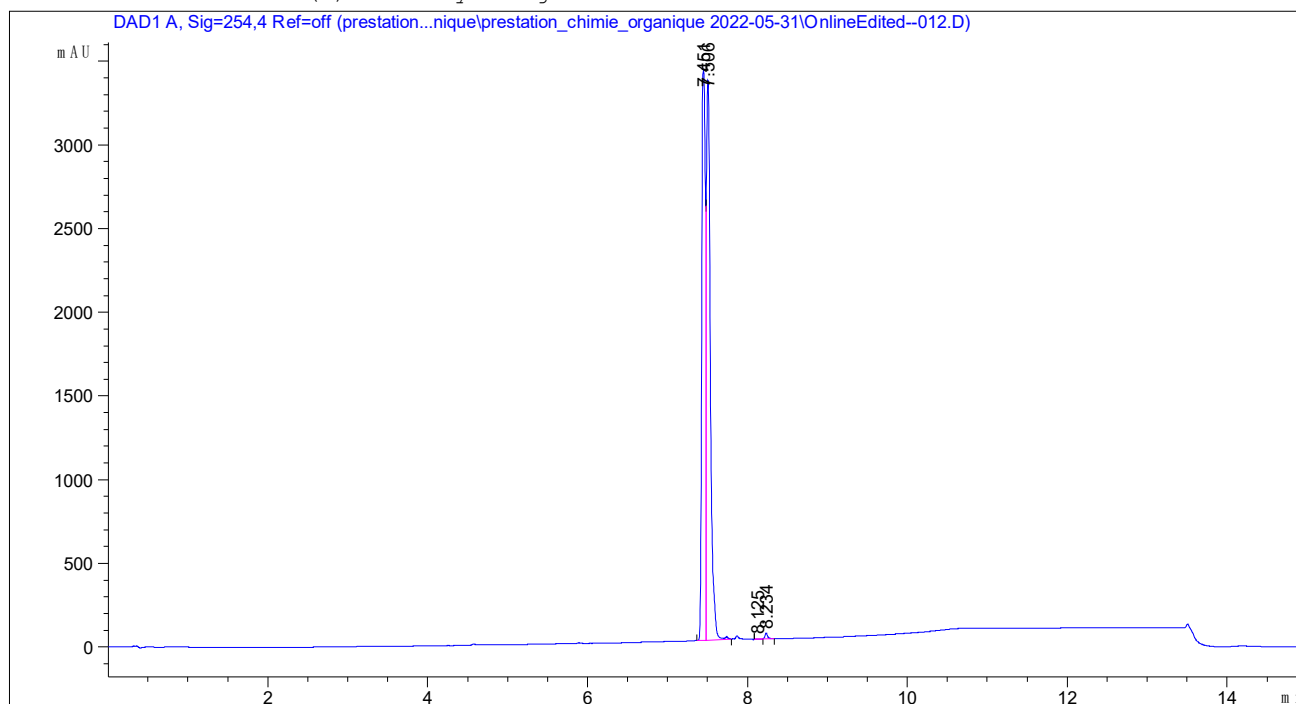

```
=====
                          Area Percent Report
=====
```

```
Sorted By      :      Signal
Multiplier     :      1.0000
Dilution       :      1.0000
Use Multiplier & Dilution Factor with ISTDs
```

Signal 1: DAD1 A, Sig=254,4 Ref=off

| Peak # | RetTime [min] | Type | Width [min] | Area [mAU*s] | Height [mAU] | Area %  |
|--------|---------------|------|-------------|--------------|--------------|---------|
| 1      | 7.451         | BV   | 0.0511      | 1.08159e4    | 3402.30518   | 47.4057 |
| 2      | 7.506         | VV R | 0.0534      | 1.18947e4    | 3347.82104   | 52.1343 |
| 3      | 8.125         | BV E | 0.0416      | 6.88685      | 2.46230      | 0.0302  |
| 4      | 8.234         | VB R | 0.0405      | 98.07407     | 36.34929     | 0.4299  |

Totals :                      2.28156e4   6788.93781

## Compound 8b

PEP09-3Fcis

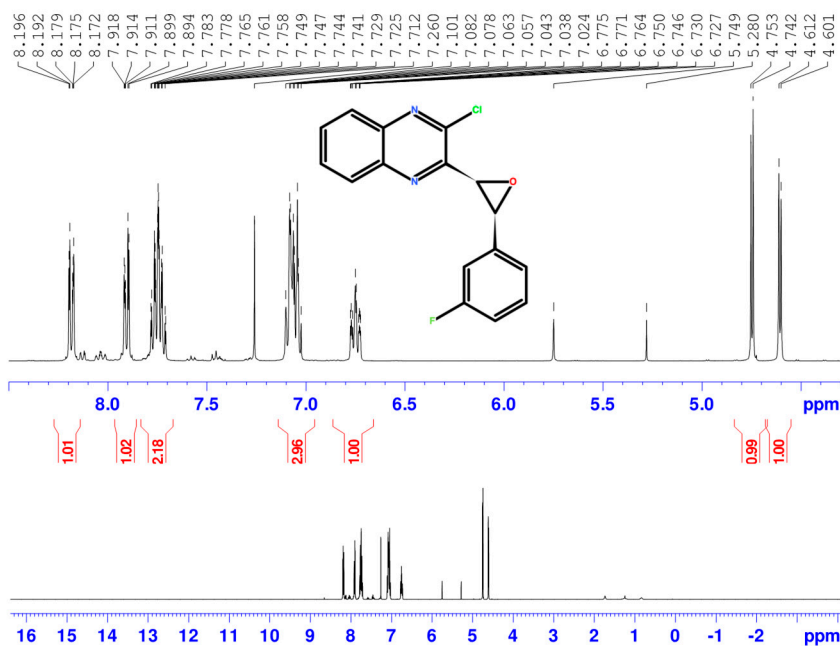

Current Data Parameters  
 NAME PEP09\_F2\_1H  
 EXPNO 10  
 PROCNO 1

F2 - Acquisition Parameters  
 Date\_ 20200611  
 Time 11.29 h  
 INSTRUM Avance NEO 400  
 PROBHD Z163739\_0130 (   
 PULPROG zg30  
 TD 65536  
 SOLVENT CDCl3  
 NS 16  
 DS 2  
 SWH 8196.722 Hz  
 FIDRES 0.250144 Hz  
 AQ 3.9976959 sec  
 RG 70.3163  
 DW 61.000 usec  
 DE 13.97 usec  
 TE 298.0 K  
 D1 1.00000000 sec  
 TD0 1  
 SFO1 400.1324708 MHz  
 NUC1 1H  
 P0 2.51 usec  
 P1 7.53 usec  
 PLW1 22.80999947 W

F2 - Processing parameters  
 SI 65536  
 SF 400.1300103 MHz  
 WDW EM  
 SSB 0  
 LB 0.30 Hz  
 GB 0  
 PC 1.00

PEP09-3Fcis

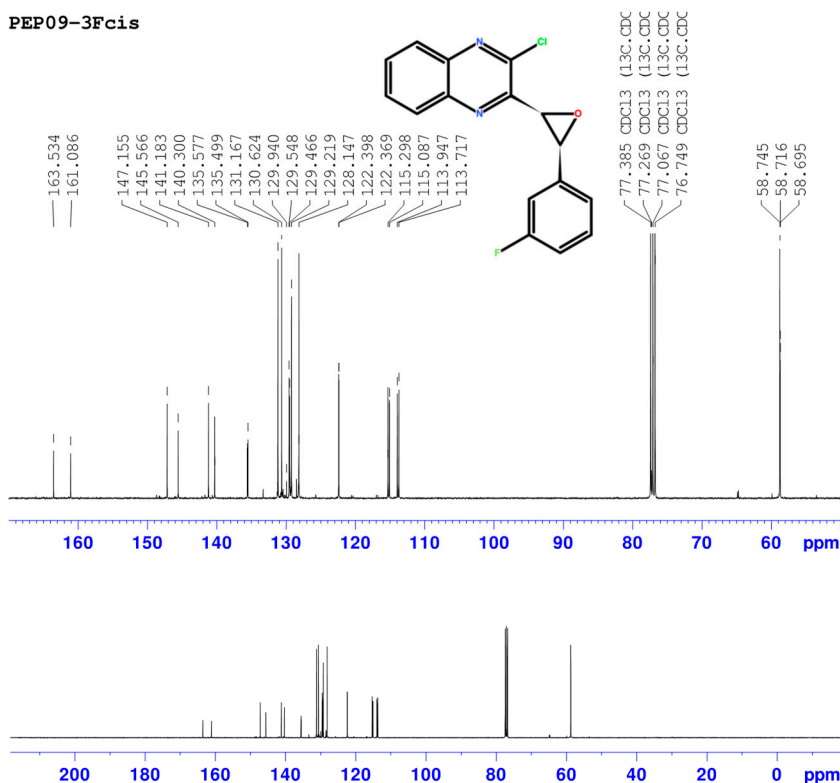

Current Data Parameters  
 NAME PEP09\_F2\_13C  
 EXPNO 20  
 PROCNO 1

F2 - Acquisition Parameters  
 Date\_ 20200614  
 Time 3.14 h  
 INSTRUM Avance NEO 400  
 PROBHD Z163739\_0130 (   
 PULPROG zgpg30  
 TD 65536  
 SOLVENT CDCl3  
 NS 2048  
 DS 4  
 SWH 23809.523 Hz  
 FIDRES 0.726609 Hz  
 AQ 1.3762560 sec  
 RG 101  
 DW 21.000 usec  
 DE 6.50 usec  
 TE 298.0 K  
 D1 2.00000000 sec  
 D11 0.03000000 sec  
 TD0 1  
 SFO1 100.6228298 MHz  
 NUC1 13C  
 P0 2.67 usec  
 P1 8.00 usec  
 PLW1 95.56300354 W  
 SFO2 400.1316005 MHz  
 NUC2 1H  
 CPGPRG2 waltz65  
 PCPD2 90.00 usec  
 PLW2 22.80999947 W  
 PLW12 0.15967000 W  
 PLW13 0.08031400 W

F2 - Processing parameters  
 SI 32768  
 SF 100.6127685 MHz  
 WDW EM  
 SSB 0  
 LB 1.00 Hz  
 GB 0  
 PC 1.40

Data File C:\Chem32\...\rganique\prestation\_chimie\_organique 2022-05-31\OnlineEdited--013.D  
Sample Name: PEP09F2

```
=====
Acq. Operator   : SYSTEM                      Seq. Line :   13
Acq. Instrument : LC1290                     Location  :   P1-B3
Injection Date  : 31/5/2022 4:18:32 PM        Inj       :    1
                                           Inj Volume: 1.000 µl
Method         : C:\Chem32\1\Data\prestation_chimie_organique\prestation_chimie_organique
                  2022-05-31\prestation_chimie_org.M (Sequence Method)
Last changed    : 31/5/2022 1:07:56 PM by SYSTEM
Additional Info : Peak(s) manually integrated
=====
```

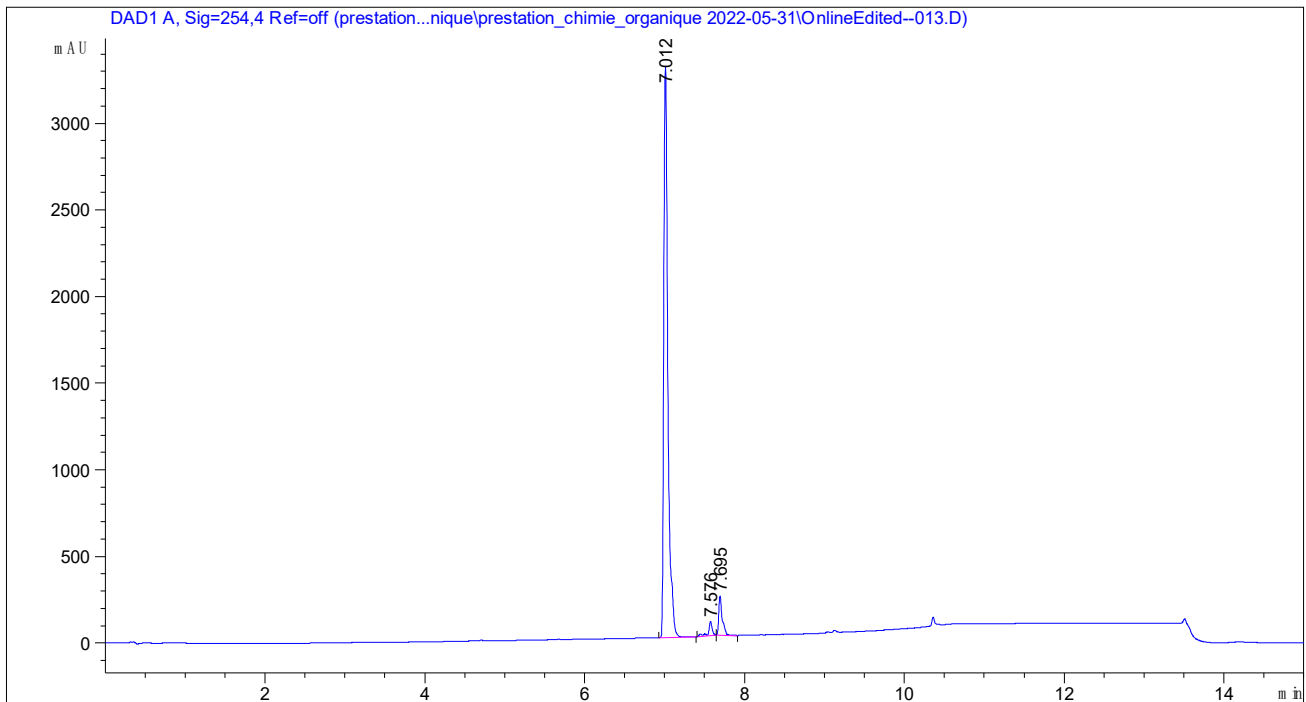

```
=====
                          Area Percent Report
=====
```

```
Sorted By           :      Signal
Multiplier           :      1.0000
Dilution             :      1.0000
Use Multiplier & Dilution Factor with ISTDs
```

Signal 1: DAD1 A, Sig=254,4 Ref=off

| Peak # | RetTime [min] | Type | Width [min] | Area [mAU*s] | Height [mAU] | Area %  |
|--------|---------------|------|-------------|--------------|--------------|---------|
| 1      | 7.012         | BV R | 0.0528      | 1.15331e4    | 3299.14502   | 92.3663 |
| 2      | 7.576         | VB R | 0.0371      | 265.32071    | 82.35912     | 2.1249  |
| 3      | 7.695         | BV R | 0.0441      | 687.83380    | 226.55388    | 5.5087  |

Totals : 1.24862e4 3608.05801

```
=====
*** End of Report ***
```

## Compound 9a

2022-03-07

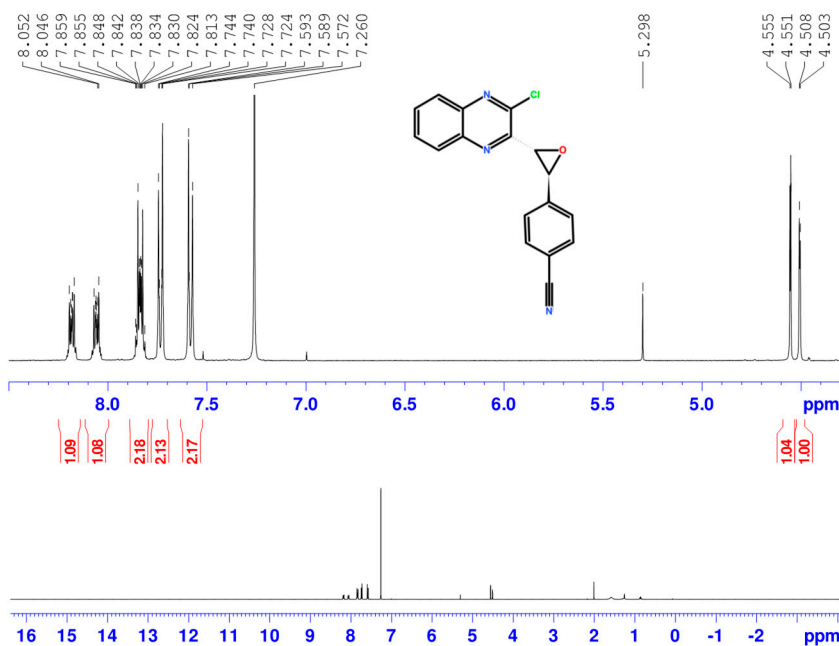

Current Data Parameters  
 NAME PEP07\_F1\_1H  
 EXPNO 60  
 PROCNO 1

F2 - Acquisition Parameters  
 Date\_ 20220307  
 Time 19.36 h  
 INSTRUM Avance NEO 400  
 PROBRD Z163739\_0130 (zg30)  
 PULPROG zg30  
 TD 65536  
 SOLVENT CDCl3  
 NS 16  
 DS 2  
 SWH 8196.722 Hz  
 FIDRES 0.250144 Hz  
 AQ 3.9976959 sec  
 RG 101  
 DW 61.000 usec  
 DE 13.97 usec  
 TE 298.0 K  
 D1 1.00000000 sec  
 TDO 1  
 SFO1 400.1324708 MHz  
 NUC1 1H  
 P0 2.51 usec  
 P1 7.53 usec  
 PLW1 22.80999947 W

F2 - Processing Parameters  
 SI 65536  
 SF 400.1300102 MHz  
 WDW EM  
 SSB 0  
 LB 0.30 Hz  
 GB 0  
 PC 1.00

2022-03-09

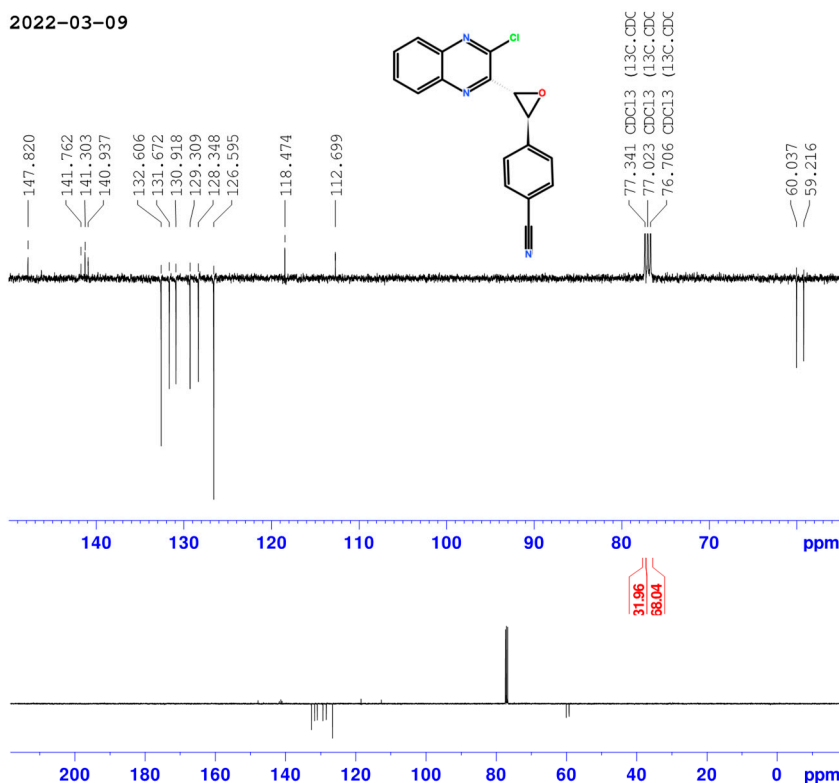

Current Data Parameters  
 NAME PEP07\_F1\_13C  
 EXPNO 10  
 PROCNO 1

F2 - Acquisition Parameters  
 Date\_ 20220310  
 Time 0.26 h  
 INSTRUM Avance NEO 400  
 PROBRD Z163739\_0130 (zgpg30)  
 PULPROG zgpg30  
 TD 65536  
 SOLVENT CDCl3  
 NS 3048  
 DS 4  
 SWH 23809.323 Hz  
 FIDRES 0.726609 Hz  
 AQ 1.3762560 sec  
 RG 101  
 DW 21.000 usec  
 DE 6.50 usec  
 TE 298.0 K  
 CNST1 145.0000000  
 CNST11 1.0000000  
 D1 2.00000000 sec  
 D20 0.00689653 sec  
 TDO 1  
 SFO1 100.6282898 MHz  
 NUC1 13C  
 P1 8.00 usec  
 P2 16.00 usec  
 PLW1 95.56300354 W  
 SFO2 400.1316005 MHz  
 NUC2 1H  
 CPDPRG2 waltz16  
 PCPD2 90.00 usec  
 PLW2 22.80999947 W  
 PLW12 0.15967000 W

F2 - Processing Parameters  
 SI 32768  
 SF 100.6127685 MHz  
 WDW EM  
 SSB 0  
 LB 1.00 Hz  
 GB 0  
 PC 1.40

Data File C:\Chem32\...rganique\prestation\_chimie\_organique 2022-05-31\OnlineEdited--008.D  
 Sample Name: PEP07F1

```
=====
Acq. Operator   : SYSTEM                      Seq. Line :    8
Acq. Instrument : LC1290                     Location  : P1-A7
Injection Date  : 31/5/2022 2:59:28 PM        Inj       :    1
                                           Inj Volume: 1.000 µl
Method          : C:\Chem32\1\Data\prestation_chimie_organique\prestation_chimie_organique
                  2022-05-31\prestation_chimie_org.M (Sequence Method)
Last changed    : 31/5/2022 1:07:56 PM by SYSTEM
Additional Info  : Peak(s) manually integrated
=====
```

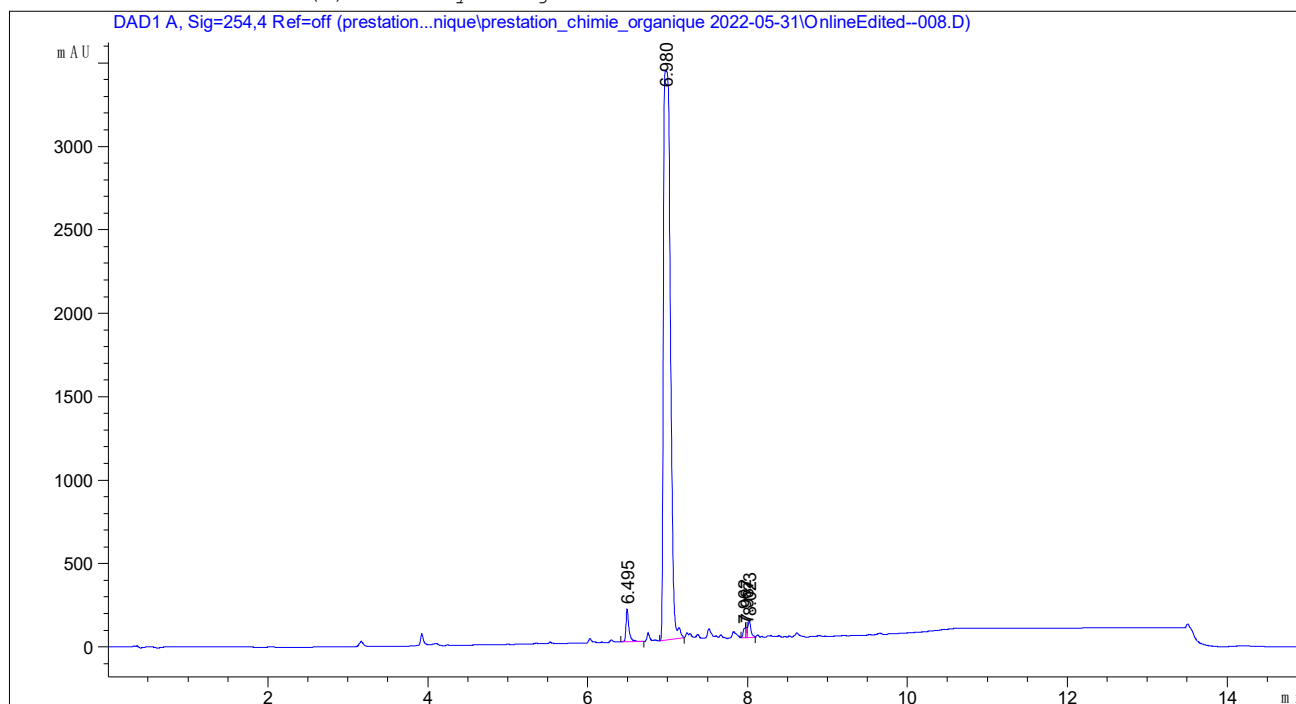

```
=====
                        Area Percent Report
=====
```

```
Sorted By           : Signal
Multiplier          : 1.0000
Dilution            : 1.0000
Use Multiplier & Dilution Factor with ISTDs
```

Signal 1: DAD1 A, Sig=254,4 Ref=off

| Peak # | RetTime [min] | Type | Width [min] | Area [mAU*s] | Height [mAU] | Area %  |
|--------|---------------|------|-------------|--------------|--------------|---------|
| 1      | 6.495         | VV R | 0.0409      | 536.18005    | 195.82469    | 2.4979  |
| 2      | 6.980         | BV R | 0.0945      | 2.04915e4    | 3411.73242   | 95.4624 |
| 3      | 7.962         | BV   | 0.0273      | 98.75806     | 56.66538     | 0.4601  |
| 4      | 7.987         | VV   | 0.0210      | 84.59011     | 58.14962     | 0.3941  |
| 5      | 8.023         | VB   | 0.0372      | 254.48518    | 98.30723     | 1.1856  |

Totals : 2.14655e4 3820.67934

## Compound 9b

2022-03-07

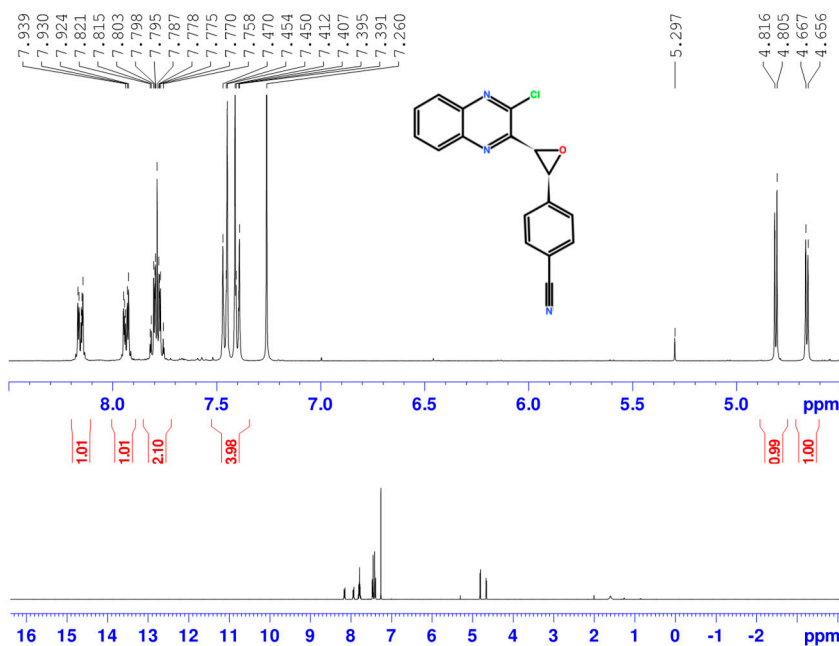

Current Data Parameters  
 NAME PEP07\_F2\_1H  
 EXPNO 30  
 PROCNO 1

F2 - Acquisition Parameters  
 Date\_ 20220307  
 Time 19.43 h  
 INSTRUM Avance NEO 400  
 PROBHD Z163739\_0130 (zg30)  
 PULPROG zg30  
 TD 65536  
 SOLVENT CDCl3  
 NS 16  
 DS 2  
 SWH 8196.722 Hz  
 FIDRES 0.250144 Hz  
 AQ 3.9976959 sec  
 RG 101  
 DW 61.000 usec  
 DE 13.97 usec  
 TE 298.0 K  
 D1 1.00000000 sec  
 TD0 1  
 SFO1 400.1324708 MHz  
 NUC1 1H  
 P0 2.51 usec  
 P1 7.53 usec  
 PLW1 22.80999947 W

F2 - Processing Parameters  
 SI 65536  
 SF 400.1300102 MHz  
 WDW EM  
 SSB 0  
 LB 0.30 Hz  
 GB 0  
 PC 1.00

2022-03-09

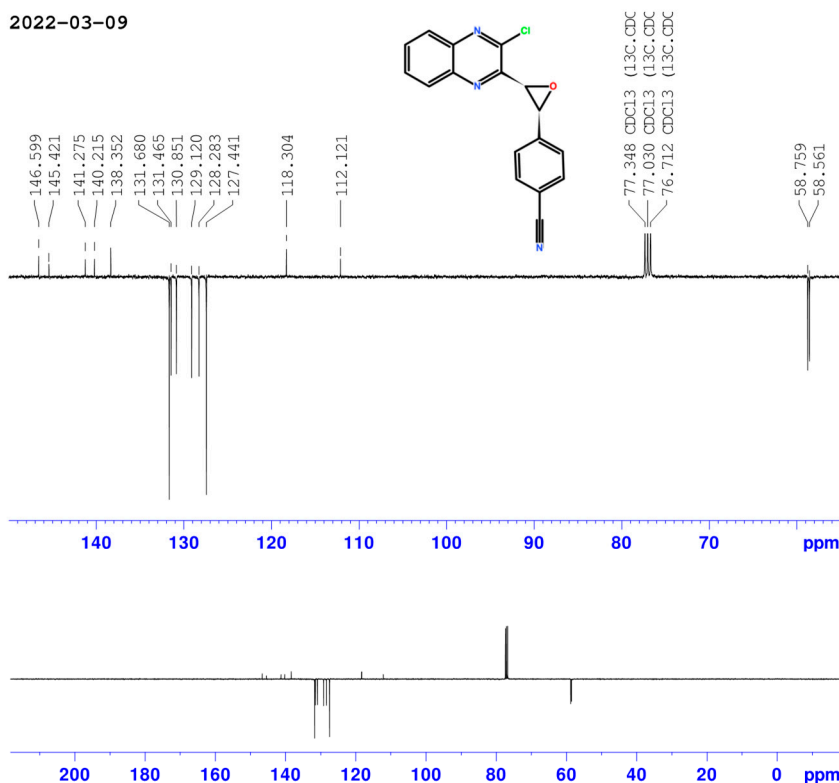

Current Data Parameters  
 NAME PEP07\_F2\_13C  
 EXPNO 10  
 PROCNO 1

F2 - Acquisition Parameters  
 Date\_ 20220310  
 Time 2.29 h  
 INSTRUM Avance NEO 400  
 PROBHD Z163739\_0130 (gmod)  
 PULPROG gmod  
 TD 65536  
 SOLVENT CDCl3  
 NS 2048  
 DS 4  
 SWH 23809.323 Hz  
 FIDRES 0.726609 Hz  
 AQ 1.3762560 sec  
 RG 101  
 DW 21.000 usec  
 DE 6.50 usec  
 TE 298.0 K  
 CNST2 145.0000000  
 CNST11 1.0000000  
 D1 2.00000000 sec  
 D20 0.00689653 sec  
 TD0 1  
 SFO1 100.6282398 MHz  
 NUC1 13C  
 P1 8.00 usec  
 P2 16.00 usec  
 PLW1 95.5630354 W  
 SFO2 400.1316005 MHz  
 NUC2 1H  
 CPDPRG2 waltz165  
 PCPD2 90.00 usec  
 PLW2 22.80999947 W  
 PLW12 0.15967000 W

F2 - Processing Parameters  
 SI 32768  
 SF 100.6127685 MHz  
 WDW EM  
 SSB 0  
 LB 1.00 Hz  
 GB 0  
 PC 1.40

Data File C:\Chem32\...\rganique\prestation\_chimie\_organique 2022-05-31\OnlineEdited--009.D  
Sample Name: PEP07F2

```
=====
Acq. Operator   : SYSTEM                      Seq. Line :    9
Acq. Instrument : LC1290                     Location  :   P1-A8
Injection Date  : 31/5/2022 3:15:15 PM        Inj       :    1
                                           Inj Volume: 1.000 µl
Method          : C:\Chem32\1\Data\prestation_chimie_organique\prestation_chimie_organique
                  2022-05-31\prestation_chimie_org.M (Sequence Method)
Last changed    : 31/5/2022 1:07:56 PM by SYSTEM
Additional Info  : Peak(s) manually integrated
=====
```

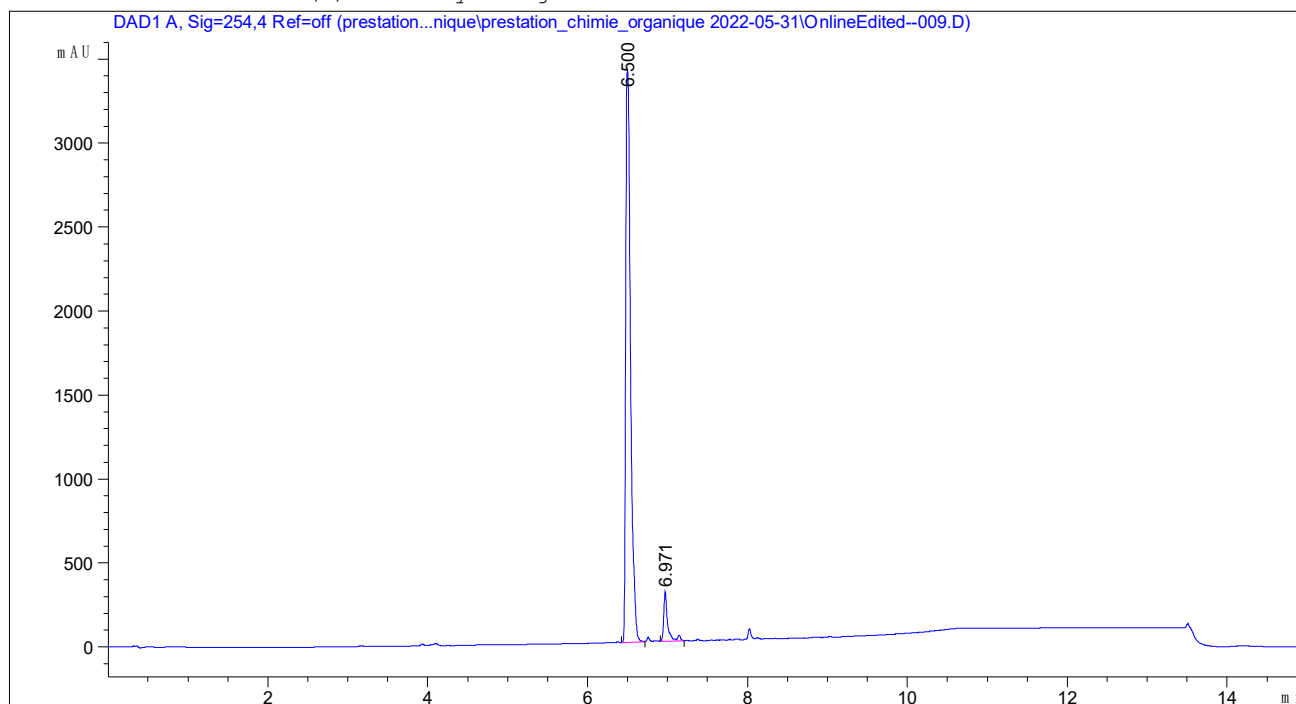

```
=====
                          Area Percent Report
=====
```

```
Sorted By      :      Signal
Multiplier     :      1.0000
Dilution       :      1.0000
Use Multiplier & Dilution Factor with ISTDs
```

Signal 1: DAD1 A, Sig=254,4 Ref=off

| Peak # | RetTime [min] | Type | Width [min] | Area [mAU*s] | Height [mAU] | Area %  |
|--------|---------------|------|-------------|--------------|--------------|---------|
| 1      | 6.500         | BV   | 0.0660      | 1.45766e4    | 3403.29370   | 93.5690 |
| 2      | 6.971         | BV R | 0.0438      | 1001.83966   | 294.29852    | 6.4310  |

Totals :                      1.55784e4  3697.59222

```
=====
*** End of Report ***
```

2022-03-03

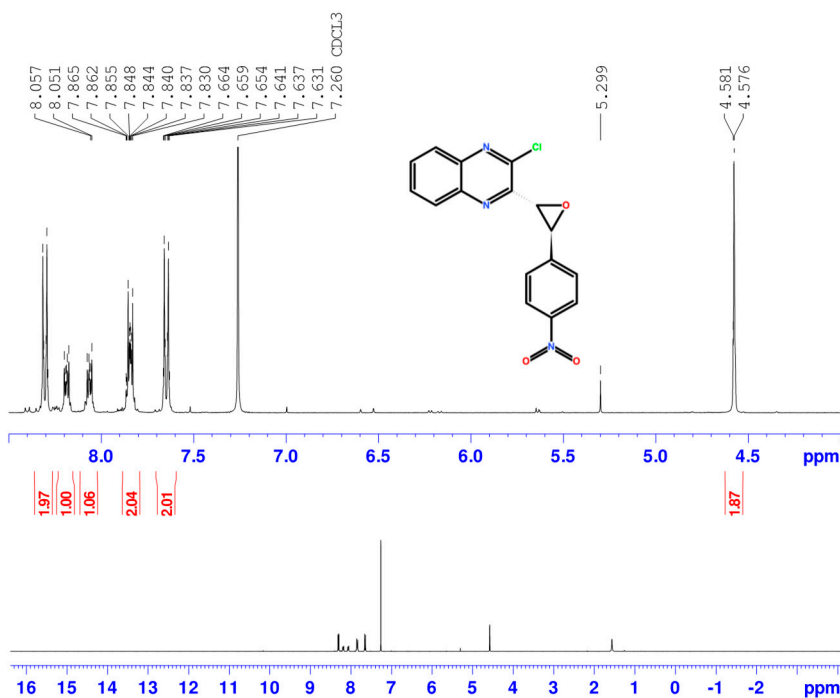

```
Current Data Parameters
NAME          PEP05_F1_1H
EXPNO          60
PROCNO         1
```

```

P2 - Acquisition Parameters
Date_          20220303
Time           12.50 h
INSTRUM        Avance NEO 400
PROBHD         1261379_0130 -
PULPROG        zgpg30
TD             65536
SOLVENT        CDCl3
NS             16
DS             2
SWH            8196.722 Hz
FIDRES         0.250144 Hz
AQ             3.9976959 sec
RG             101
DE             61.0000 usec
WE             13.97 usec
TE            298.0 K
D1             1.00000000 sec
INSTRUM        1
SFO1           400.1324708 MHz
NUC1           1H
P2             2.51 usec
P1             7.53 usec
PLN1           22.80999947 W

```

```
F2 - Processing parameters
SI                65536
SF                400.1300103 MHz
WDW               EM
SSB               0
LB                0.30 Hz
GB                0
PC                1.00
```

2022-03-07

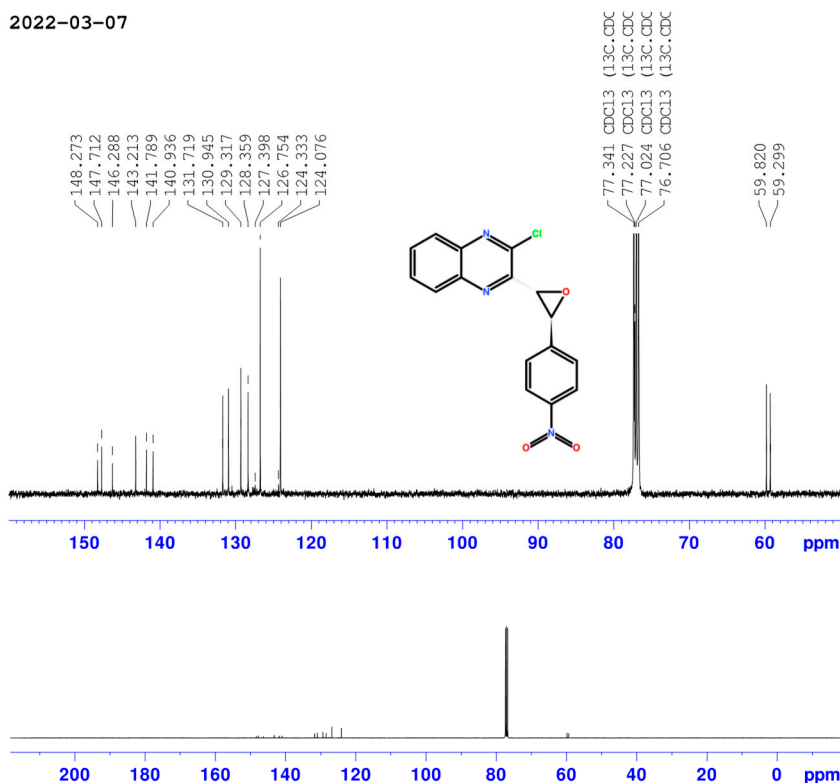

```
Current Data Parameters
NAME          PEP05_F1_13C
EXPNO         40
PROCNO        1
```

| F2 - Acquisition Parameters |                 |  |
|-----------------------------|-----------------|--|
| Date_                       | 20220306        |  |
| Time                        | 14:19 h         |  |
| INSTRUM                     | Avarice NEO 400 |  |
| PROBHD                      | CPX13           |  |
| PULPROG                     | zgpg30          |  |
| TD                          | 65536           |  |
| SOLVENT                     | CDCl3           |  |
| NS                          | 6000            |  |
| DS                          | 4               |  |
| SWH                         | 23809.923 Hz    |  |
| FIDRES                      | 0.736509 Hz     |  |
| RG                          | 1.3762560 sec   |  |
| DW                          | 101             |  |
| DE                          | 21.000 msec     |  |
| TE                          | 6.50 msec       |  |
| TD                          | 298.0 K         |  |
| DE                          | 2.0000000 sec   |  |
| d1                          | 0.0300000 sec   |  |
| DELTA                       | 1               |  |
| SFO1                        | 100.628298 MHz  |  |
| NUC1                        | 13C             |  |
| P1                          | 2.67 sec        |  |
| PC                          | 8.00 msec       |  |
| PLW1                        | 95.5030354 W    |  |
| SFO2                        | 400.131605 MHz  |  |
| PLW2                        | 2.67 W          |  |
| CPDPRG2                     | waltz65         |  |
| PCPD2                       | 90.00 msec      |  |
| PLW3                        | 22.809344 W     |  |
| PLW4                        | 0.1596700 W     |  |
| PLM13                       | 0.0803140 W     |  |

```
F2 - Processing parameters
SI              32768
SF              100.6127685 MHz
WDW             EM
SSB             0
LB              1.00 Hz
GB              0
PC              1.40
```



## Compound 10b

2022-06-03

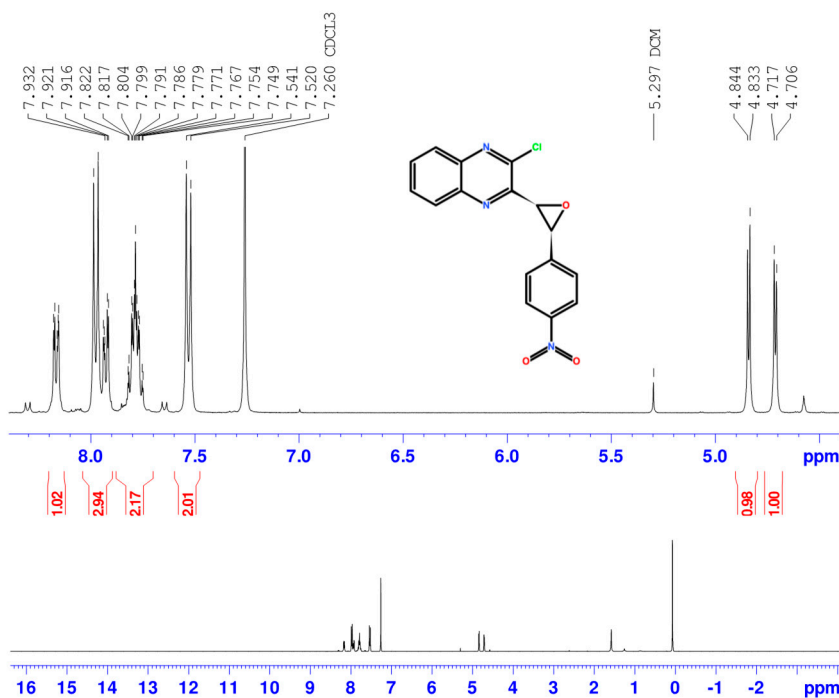

Current Data Parameters  
 NAME PEP05\_F2\_1H  
 EXPNO 50  
 PROCNO 1

F2 - Acquisition Parameters  
 Date\_ 20220603  
 Time 11.36 h  
 INSTRUM Avance NEO 400  
 PROBHD Z163739\_0130 (zg30)  
 PULPROG zg30  
 TD 65536  
 SOLVENT CDCl<sub>3</sub>  
 NS 16  
 DS 2  
 SWH 8196.722 Hz  
 FIDRES 0.250144 Hz  
 AQ 3.9976959 sec  
 RG 101  
 DW 61.000 usec  
 DE 13.97 usec  
 TE 298.0 K  
 D1 1.00000000 sec  
 TD0 1  
 SFO1 400.1324708 MHz  
 NUC1 1H  
 P0 2.51 usec  
 P1 7.53 usec  
 PLW1 22.80999947 W

F2 - Processing parameters  
 SI 65536  
 SF 400.1300106 MHz  
 WDW EM  
 SSB 0  
 LB 0.30 Hz  
 GB 0  
 PC 1.00

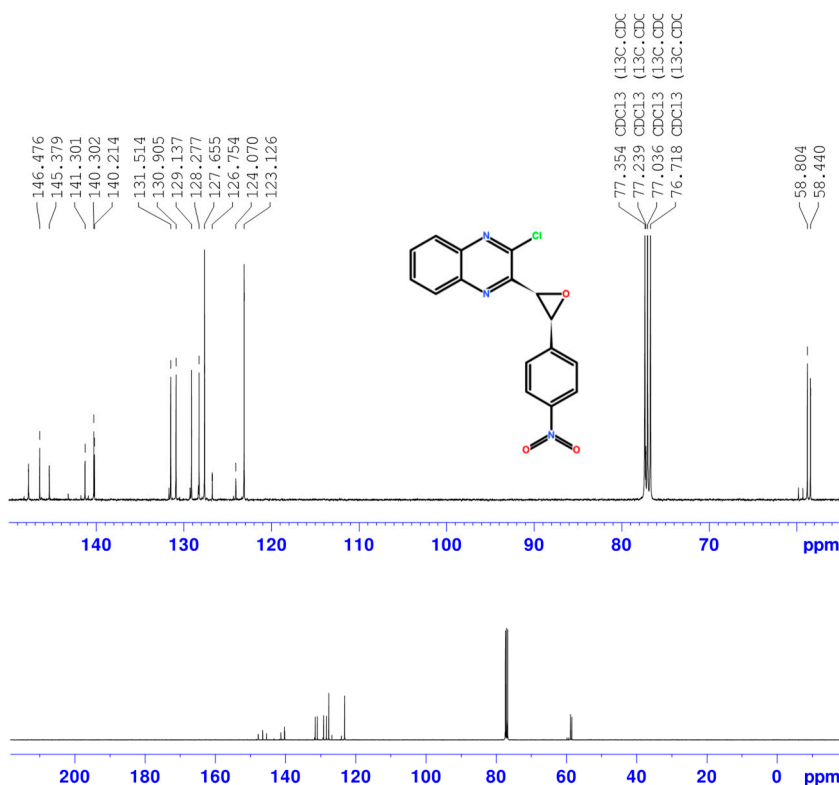

Current Data Parameters  
 NAME PEP05\_F2\_13C  
 EXPNO 20  
 PROCNO 1

F2 - Acquisition Parameters  
 Date\_ 20220306  
 Time 20.09 h  
 INSTRUM Avance NEO 400  
 PROBHD Z163739\_0130 (zgpg30)  
 PULPROG zgpg30  
 TD 65536  
 SOLVENT CDCl<sub>3</sub>  
 NS 6000  
 DS 4  
 SWH 23809.523 Hz  
 FIDRES 0.726609 Hz  
 AQ 1.3762560 sec  
 RG 101  
 DW 21.000 usec  
 DE 6.50 usec  
 TE 298.0 K  
 D1 2.00000000 sec  
 D11 0.03000000 sec  
 TD0 1  
 SFO1 100.6228298 MHz  
 NUC1 13C  
 P0 2.67 usec  
 P1 8.00 usec  
 PLW1 95.56300354 W  
 SFO2 400.1316005 MHz  
 NUC2 1H  
 CPGPRG2 waltz16  
 PCPD2 90.00 usec  
 PLM2 22.80999947 W  
 PLM12 0.15967000 W  
 PLM13 0.08031400 W

F2 - Processing parameters  
 SI 32768  
 SF 100.6127685 MHz  
 WDW EM  
 SSB 0  
 LB 1.00 Hz  
 GB 0  
 PC 1.40

## Compound 11a

2022-02- 14 PEP38F1

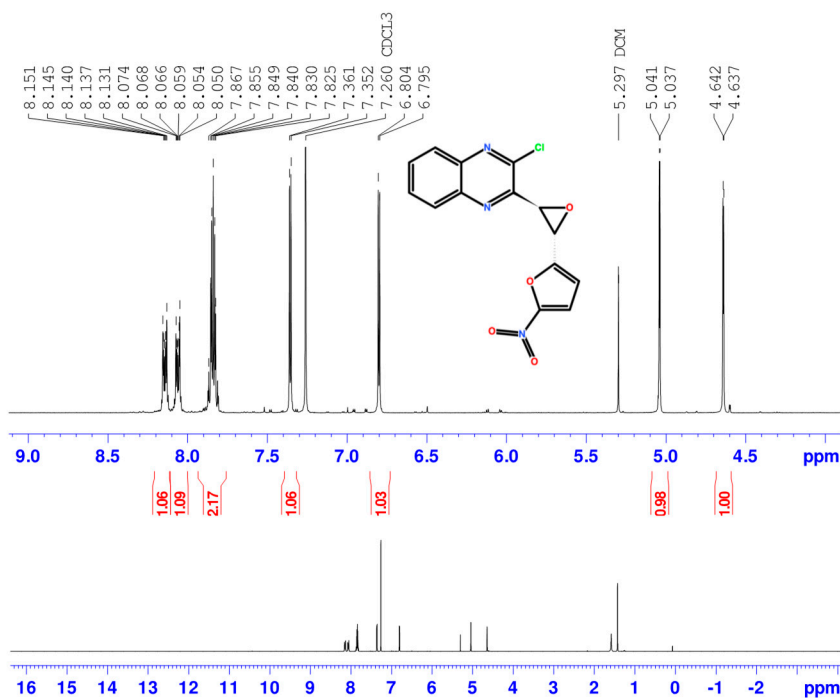

Current Data Parameters  
 NAME PEP38\_F1\_1H  
 EXPNO 50  
 PROCNO 1

F2 - Acquisition Parameters  
 Date\_ 20220214  
 Time 16.53 h  
 INSTRUM Avance NEO 400  
 PROBHD Z163739\_0130 (z)  
 PULPROG zg30  
 TD 65536  
 SOLVENT CDCl3  
 NS 16  
 DS 2  
 SWH 8196.722 Hz  
 FIDRES 0.250144 Hz  
 AQ 3.9976959 sec  
 RG 101  
 DW 61.000 usec  
 DE 13.97 usec  
 TE 298.0 K  
 D1 1.00000000 sec  
 TD0 1  
 SFO1 400.1324708 MHz  
 NUC1 1H  
 P0 2.51 usec  
 P1 7.53 usec  
 PLW1 22.80999947 W

F2 - Processing parameters  
 SI 65536  
 SF 400.1300102 MHz  
 WDW EM  
 SSB 0  
 LB 0.30 Hz  
 GB 0  
 PC 1.00

2020-06-06 PEP38F1

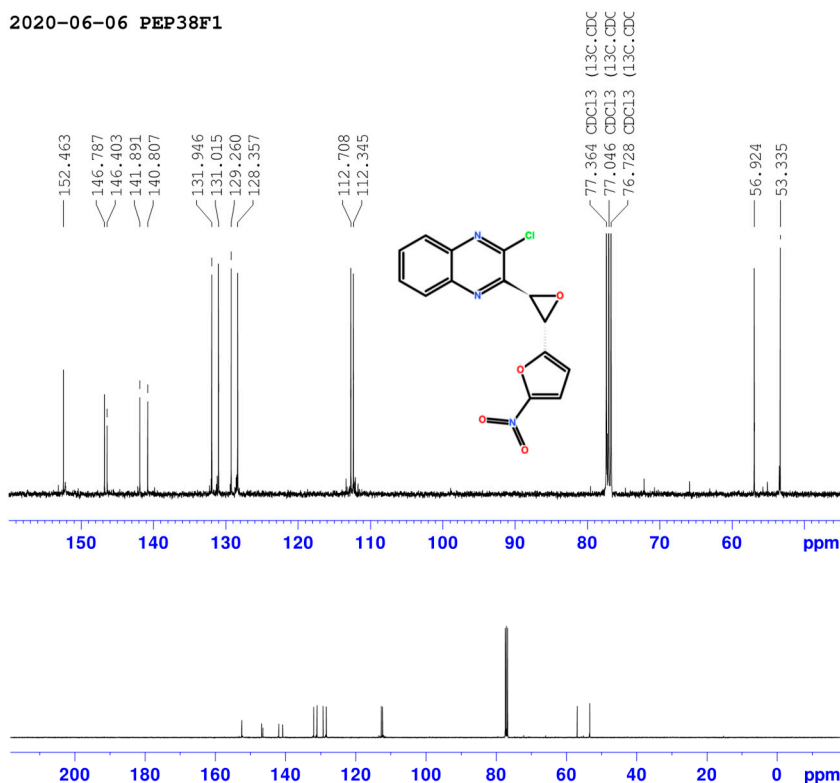

Current Data Parameters  
 NAME PEP38\_F1\_13C  
 EXPNO 50  
 PROCNO 1

F2 - Acquisition Parameters  
 Date\_ 20200626  
 Time 6.34 h  
 INSTRUM Avance NEO 400  
 PROBHD Z163739\_0130 (z)  
 PULPROG zgpg30  
 TD 65536  
 SOLVENT CDCl3  
 NS 1024  
 DS 4  
 SWH 23809.523 Hz  
 FIDRES 0.726609 Hz  
 AQ 1.3762560 sec  
 RG 101  
 DW 21.000 usec  
 DE 6.50 usec  
 TE 298.0 K  
 D1 2.00000000 sec  
 D11 0.03000000 sec  
 TD0 1  
 SFO1 100.6228298 MHz  
 NUC1 13C  
 P0 2.67 usec  
 P1 8.00 usec  
 PLW1 95.56300354 W  
 SFO2 400.1316005 MHz  
 NUC2 1H  
 CPGPRG2 waltz16  
 PCPD2 90.00 usec  
 PLW2 22.80999947 W  
 PLW12 0.15967000 W  
 PLW13 0.08031400 W

F2 - Processing parameters  
 SI 32768  
 SF 100.6127685 MHz  
 WDW EM  
 SSB 0  
 LB 1.00 Hz  
 GB 0  
 PC 1.40

Data File C:\Chem32\...\rganique\prestation\_chimie\_organique 2022-05-31\OnlineEdited--021.D  
 Sample Name: PEP38F1

```
=====
Acq. Operator   : SYSTEM                      Seq. Line :   21
Acq. Instrument : LC1290                     Location  :   P1-C2
Injection Date  : 31/5/2022 6:28:05 PM        Inj       :    1
                                           Inj Volume: 1.000 µl
Method          : C:\Chem32\1\Data\prestation_chimie_organique\prestation_chimie_organique
                  2022-05-31\prestation_chimie_org.M (Sequence Method)
Last changed    : 31/5/2022 1:07:56 PM by SYSTEM
Additional Info  : Peak(s) manually integrated
=====
```

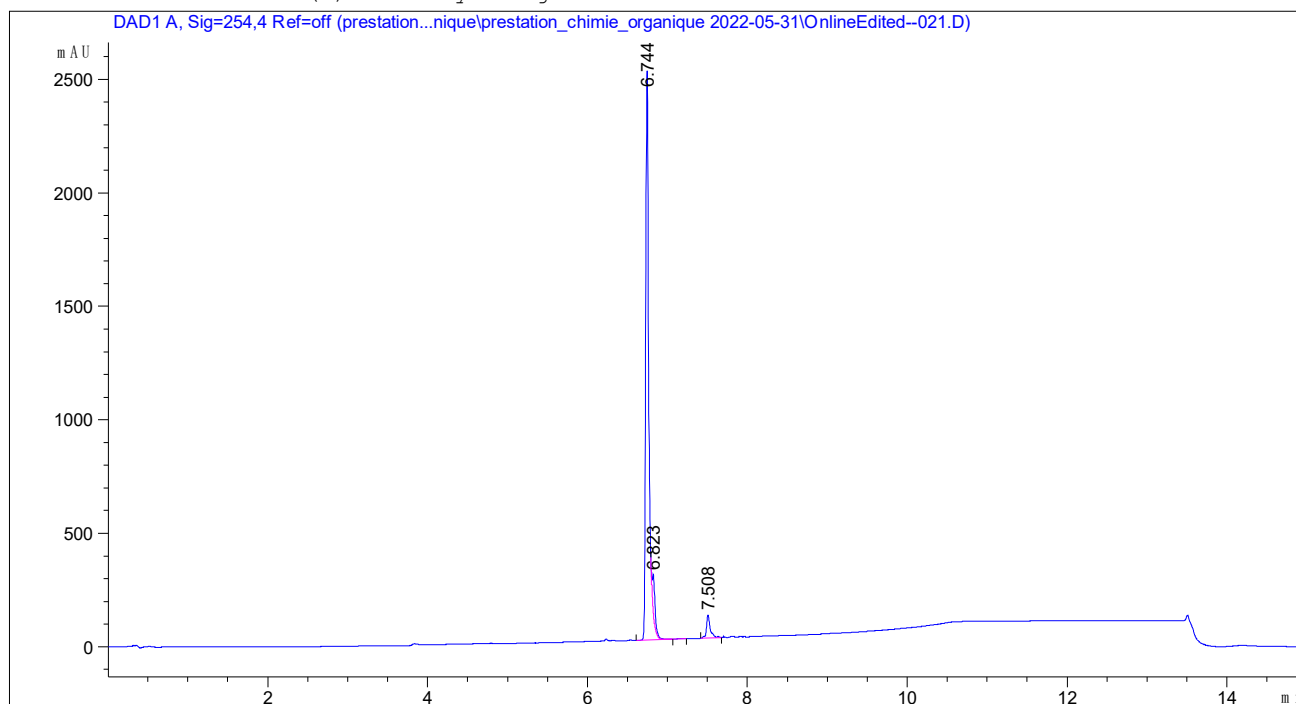

# Area Percent Report

```
Sorted By      :      Signal
Multiplier     :      1.0000
Dilution       :      1.0000
Use Multiplier & Dilution Factor with ISTDs
```

Signal 1: DAD1 A, Sig=254,4 Ref=off

| Peak # | RetTime [min] | Type | Width [min] | Area [mAU*s] | Height [mAU] | Area %  |
|--------|---------------|------|-------------|--------------|--------------|---------|
| 1      | 6.744         | BV R | 0.0422      | 7142.30420   | 2512.12720   | 90.6447 |
| 2      | 6.823         | VV E | 0.0357      | 404.16541    | 164.43279    | 5.1294  |
| 3      | 7.508         | VV R | 0.0452      | 332.97885    | 101.38938    | 4.2259  |

Totals : 7879.44846 2777.94936

\*\*\* End of Report \*\*\*

## Compound 11b

2020-06-25 PEP38F2

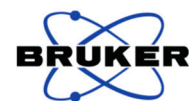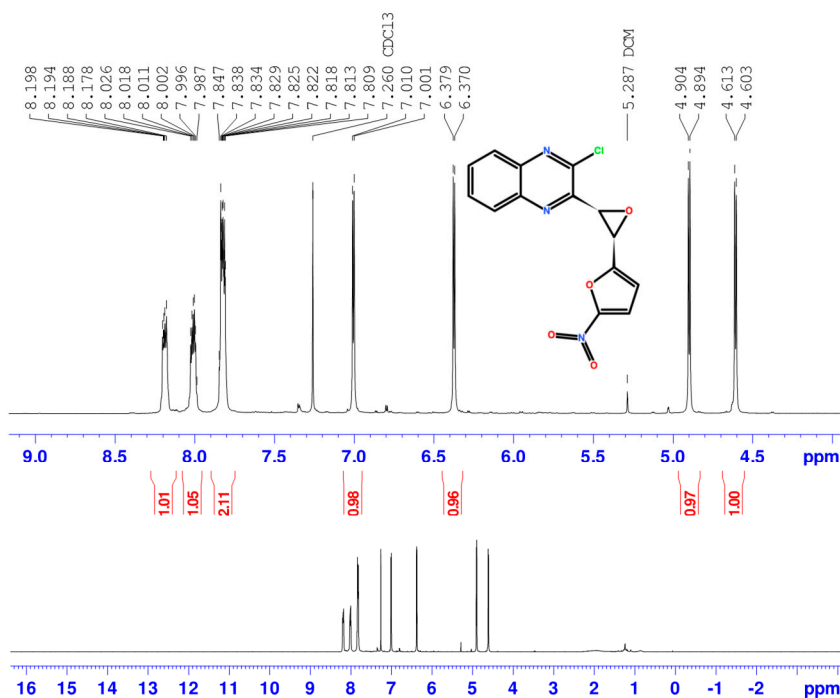

Current Data Parameters  
 NAME PEP38\_F2\_1H  
 EXPNO 10  
 PROCNO 1

F2 - Acquisition Parameters  
 Date\_ 20200625  
 Time 16.13 h  
 INSTRUM Avance NEO 400  
 PROBHD Z163739\_0130 ( )  
 PULPROG zg30  
 TD 65536  
 SOLVENT CDCl<sub>3</sub>  
 NS 16  
 DS 2  
 SWH 8196.722 Hz  
 FIDRES 0.250144 Hz  
 AQ 3.9976959 sec  
 RG 101  
 DW 61.000 usec  
 DE 13.97 usec  
 TE 298.0 K  
 D1 1.00000000 sec  
 TD0 1  
 SFO1 400.1324708 MHz  
 NUC1 1H  
 P0 2.51 usec  
 P1 7.53 usec  
 PLW1 22.80999947 W

F2 - Processing parameters  
 SI 65536  
 SF 400.1300105 MHz  
 WDW EM  
 SSB 0  
 LB 0.30 Hz  
 GB 0  
 PC 1.00

2020-06-26 PEP38F2

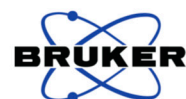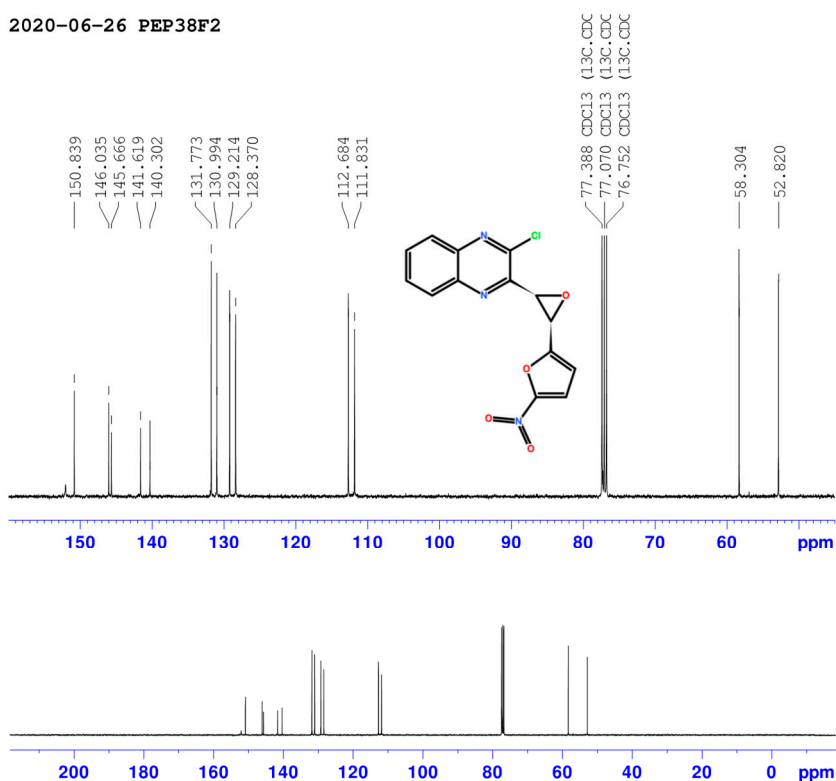

Current Data Parameters  
 NAME PEP38\_F2\_13C  
 EXPNO 11  
 PROCNO 1

F2 - Acquisition Parameters  
 Date\_ 20200626  
 Time 9.22 h  
 INSTRUM Avance NEO 400  
 PROBHD Z163739\_0130 ( )  
 PULPROG zgpg30  
 TD 65536  
 SOLVENT CDCl<sub>3</sub>  
 NS 700  
 DS 4  
 SWH 23809.523 Hz  
 FIDRES 0.726609 Hz  
 AQ 1.3762560 sec  
 RG 101  
 DW 21.000 usec  
 DE 6.50 usec  
 TE 298.0 K  
 D1 2.00000000 sec  
 D11 0.03000000 sec  
 TD0 1  
 SFO1 100.6228298 MHz  
 NUC1 13C  
 P0 2.67 usec  
 P1 8.00 usec  
 PLW1 95.56300354 W  
 SFO2 400.1316005 MHz  
 NUC2 1H  
 CPDPRG2 waltz65  
 PCPD2 90.00 usec  
 PLW2 22.80999947 W  
 PLW12 0.15967000 W  
 PLW13 0.08031400 W

F2 - Processing parameters  
 SI 32768  
 SF 100.6127685 MHz  
 WDW B4  
 SSB 0  
 LB 1.00 Hz  
 GB 0  
 PC 1.40

## Compound 12a

PEP11-HCOOEt

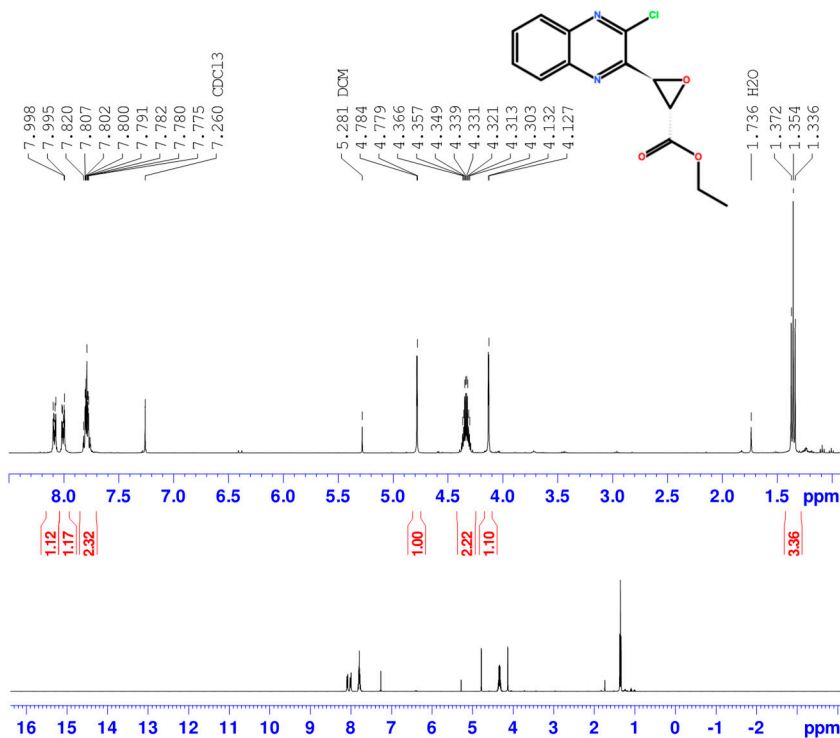

Current Data Parameters  
 NAME PEP11\_F2\_1H  
 EXPNO 10  
 PROCNO 1

F2 - Acquisition Parameters  
 Date\_ 20200623  
 Time 15.17 h  
 INSTRUM Avance NEO 400  
 PROBHD Z163739\_0130 ( )  
 PULPROG zg30  
 TD 65536  
 SOLVENT CDCl<sub>3</sub>  
 NS 16  
 DS 2  
 SWH 8196.722 Hz  
 FIDRES 0.250144 Hz  
 AQ 3.9976959 sec  
 RG 62.0438  
 DW 61.000 usec  
 DE 13.97 usec  
 TE 298.0 K  
 D1 1.00000000 sec  
 TD0 1  
 SFO1 400.1324708 MHz  
 NUC1 1H  
 P0 2.51 usec  
 P1 7.53 usec  
 PLW1 22.80999947 W

F2 - Processing parameters  
 SI 65536  
 SF 400.1300103 MHz  
 WDW EM  
 SSB 0  
 LB 0.30 Hz  
 GB 0  
 PC 1.00

PEP11-HCOOEt

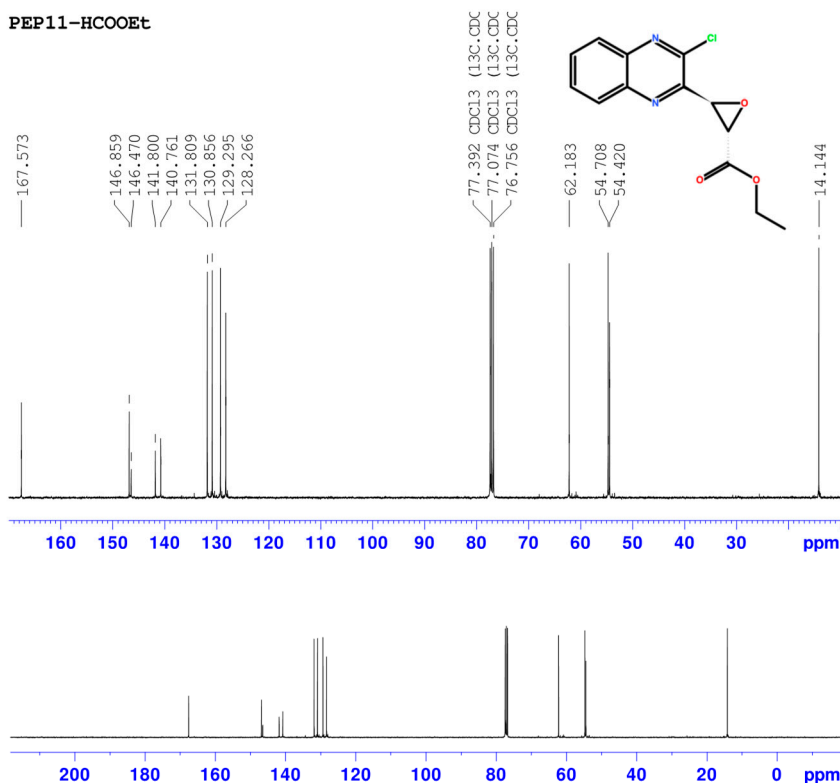

Current Data Parameters  
 NAME PEP11\_F2\_13C  
 EXPNO 20  
 PROCNO 1

F2 - Acquisition Parameters  
 Date\_ 20200626  
 Time 3.59 h  
 INSTRUM Avance NEO 400  
 PROBHD Z163739\_0130 ( )  
 PULPROG zgpg30  
 TD 65536  
 SOLVENT CDCl<sub>3</sub>  
 NS 1024  
 DS 4  
 SWH 23809.523 Hz  
 FIDRES 0.726609 Hz  
 AQ 1.3762560 sec  
 RG 101  
 DW 21.000 usec  
 DE 6.50 usec  
 TE 298.0 K  
 D1 2.00000000 sec  
 D11 0.03000000 sec  
 TD0 1  
 SFO1 100.628298 MHz  
 NUC1 13C  
 P0 2.67 usec  
 P1 8.00 usec  
 PLW1 95.56300354 W  
 SFO2 400.1316005 MHz  
 NUC2 1H  
 CPGPRG2 waltz16  
 PCPD2 90.00 usec  
 PLM2 22.80999947 W  
 PLW2 0.15967000 W  
 PLW3 0.08031400 W

F2 - Processing parameters  
 SI 32768  
 SF 100.6127685 MHz  
 WDW EM  
 SSB 0  
 LB 1.00 Hz  
 GB 0  
 PC 1.40

## Compound 13

PEP12-(COOEt) 2

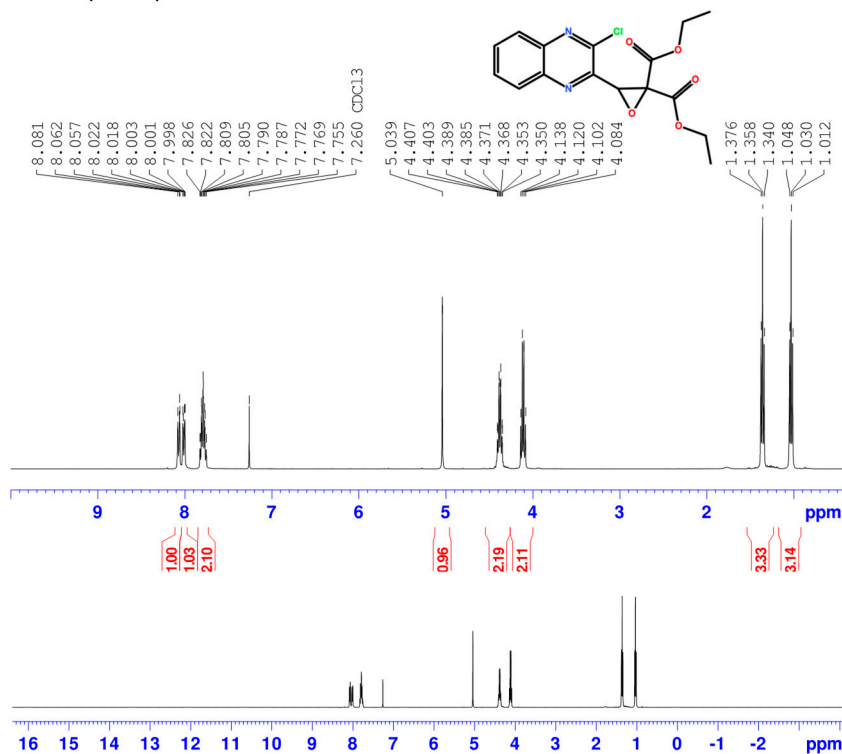

Current Data Parameters  
 NAME PEP12\_1H  
 EXPNO 10  
 PROCNO 1

F2 - Acquisition Parameters  
 Date\_ 20200619  
 Time 11.32 h  
 INSTRUM Avance NEO 400  
 PROBHD Z163739\_0130 ( )  
 PULPROG zg30  
 TD 65536  
 SOLVENT CDCl<sub>3</sub>  
 NS 16  
 DS 2  
 SWH 8196.722 Hz  
 FIDRES 0.250144 Hz  
 AQ 3.9976959 sec  
 RG 62.0438  
 DW 61.000 usec  
 DE 13.97 usec  
 TE 298.0 K  
 D1 1.00000000 sec  
 TD0 1  
 SFO1 400.1324708 MHz  
 NUC1 1H  
 P0 2.51 usec  
 P1 7.53 usec  
 PLW1 22.80999947 W

F2 - Processing parameters  
 SI 65536  
 SF 400.1300105 MHz  
 WDW EM  
 SSB 0  
 LB 0.30 Hz  
 GB 0  
 PC 1.00

PEP12-CO<sub>2</sub>Et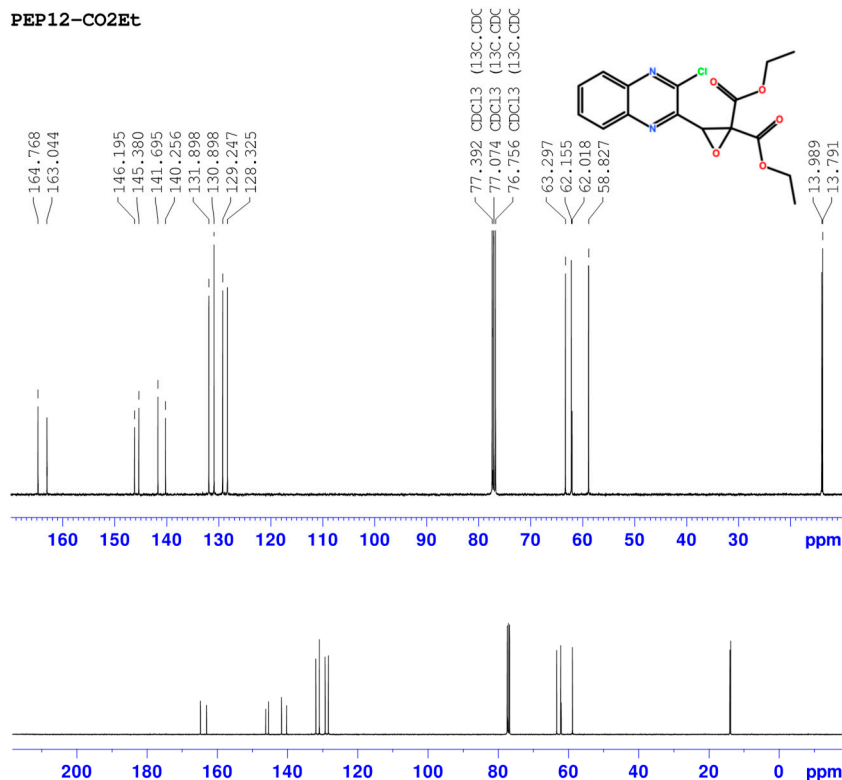

Current Data Parameters  
 NAME PEP12\_13C  
 EXPNO 11  
 PROCNO 1

F2 - Acquisition Parameters  
 Date\_ 20200619  
 Time 13.50 h  
 INSTRUM Avance NEO 400  
 PROBHD Z163739\_0130 ( )  
 PULPROG zgpg30  
 TD 65536  
 SOLVENT CDCl<sub>3</sub>  
 NS 1024  
 DS 4  
 SWH 23809.523 Hz  
 FIDRES 0.726609 Hz  
 AQ 1.3762560 sec  
 RG 101  
 DW 21.000 usec  
 DE 6.50 usec  
 TE 298.0 K  
 D1 2.00000000 sec  
 D11 0.03000000 sec  
 TD0 1  
 SFO1 100.628298 MHz  
 NUC1 13C  
 P0 2.67 usec  
 P1 8.00 usec  
 PLW1 95.56300354 W  
 SFO2 400.1316005 MHz  
 NUC2 1H  
 CPGPRG2 waltz65  
 PCPD2 90.00 usec  
 PLW2 22.80999947 W  
 PLW12 0.15967000 W  
 PLW13 0.08031400 W

F2 - Processing parameters  
 SI 32768  
 SF 100.6127685 MHz  
 WDW EM  
 SSB 0  
 LB 1.00 Hz  
 GB 0  
 PC 1.40

2022-03-07

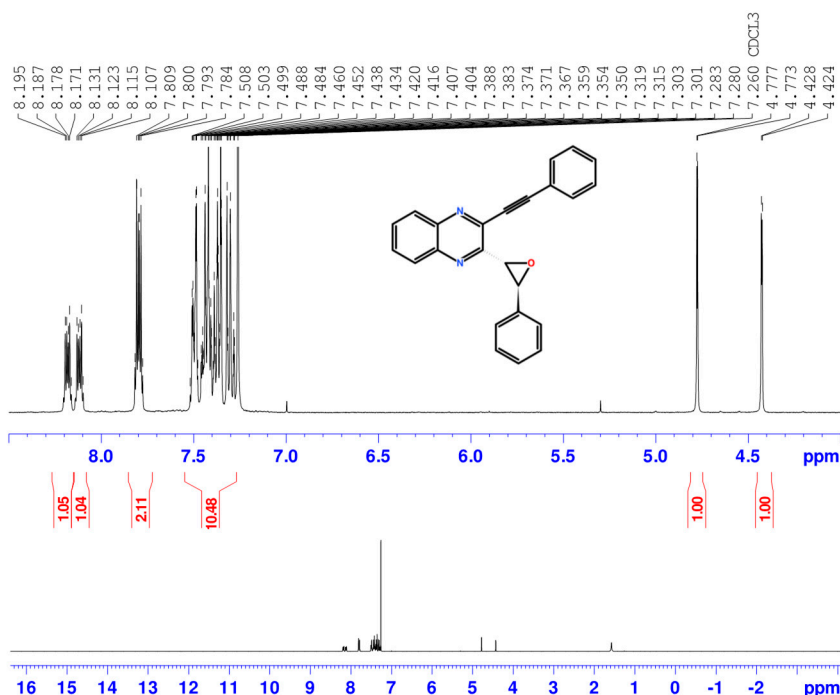

```
Current Data Parameters
NAME          PEP31_1H
EXPNO         20
PROCNO        1
```

```

P2 - Acquisition Parameters
Date_          20220307
Time           19.03 h
INSTRUM        Avance NEO 400
PROBHD         2137639_013no
PULPROG        zgpg30
TD             65536
SOLVENT        CDCl3
NS             16
DS             2
SWH            8196.722 Hz
FIDRES         0.250144 Hz
AQ            3.9976959 sec
RG            101
DE            61.0000 usec
WE            13.97 usec
TE           298.0 K
D1            1.00000000 sec
INSTRUM        1
SFO1          400.1324708 MHz
NUC1           1H
P2             2.51 usec
P1             7.53 usec
PLN1          22.80999947 W

```

```
F2 - Processing parameters
SI                65536
SF                400.1300102 MHz
WDW               EM
SSB               0
LB                0.30 Hz
GB               0
PC               1.00
```

PEP31-Ph (1)

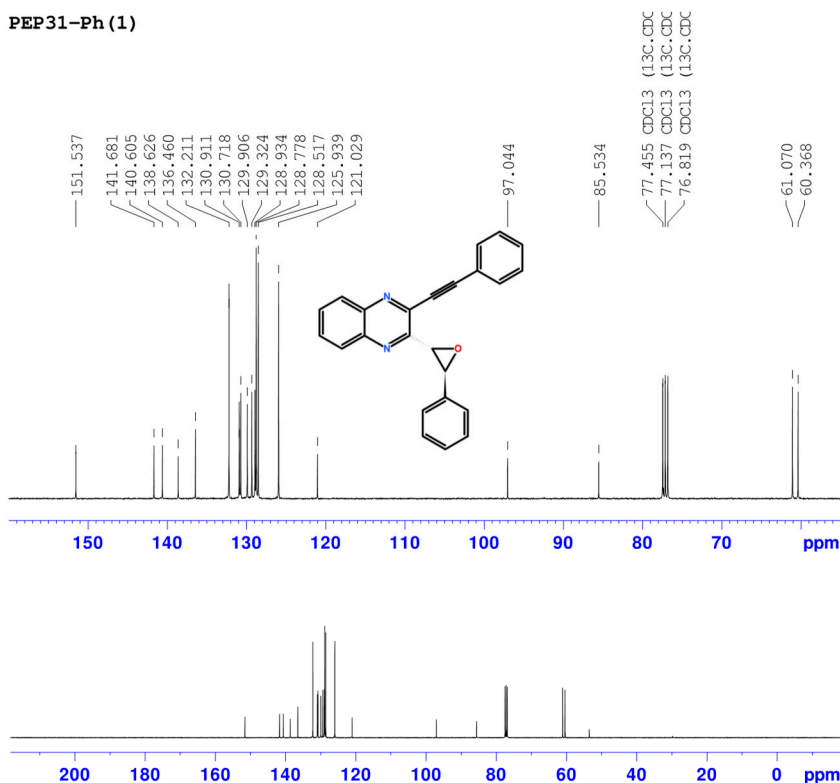

```
Current Data Parameters
NAME          PEP31_13C
EXPNO         11
PROCNO        1
```

| F2 - Acquisition Parameters |                 |
|-----------------------------|-----------------|
| Date_                       | 20200620        |
| Time                        | 12.10 h         |
| INSTRUM                     | Avance NEO 400  |
| PROBHD                      | 1B1HNPZ-1H      |
| PULPROG                     | zgpg30          |
| TD                          | 65536           |
| SOLVENT                     | CDCl3           |
| DS                          | 4               |
| SWH                         | 23809.525 Hz    |
| FIDRES                      | 0.764509 Hz     |
| RG                          | 1.3762560 sec   |
| DW                          | 101             |
| RD                          | 21.000000 sec   |
| TE                          | 6.50 usec       |
| DE                          | 298.0 K         |
| DD1                         | 2.00000000 sec  |
| DD2                         | 0.03000000 sec  |
| DD3                         | 1               |
| SFO1                        | 100.6282898 Mhz |
| N1                          | 13C             |
| NUC1                        | 2.67 usec       |
| P1                          | 8.80 usec       |
| PLW1                        | 9.59303054 W    |
| SFO2                        | 400.1316055 Mhz |
| NUC2                        | 1H              |
| CPDPRG2                     | waltzr65        |
| PCPD2                       | 90.00 usec      |
| PLW2                        | 22.80399947 W   |
| SFO3                        | 101.6281200 Mhz |
| PLM3                        | 0.08031400 W    |

```
F2 - Processing parameters
SI                32768
SF                100.6127685 MHz
WDW               EM
SSB               0
LB                1.00 Hz
GB                0
PC                1.40
```

Data File C:\Chem32\...rganique\prestation\_chimie\_organique 2022-05-31\OnlineEdited--028.D  
Sample Name: PEP31

```
=====
Acq. Operator   : SYSTEM                      Seq. Line :   28
Acq. Instrument : LC1290                     Location  :   P1-C9
Injection Date  : 31/5/2022 8:18:40 PM        Inj       :    1
                                           Inj Volume: 1.000 µl
Method          : C:\Chem32\1\Data\prestation_chimie_organique\prestation_chimie_organique
                  2022-05-31\prestation_chimie_org.M (Sequence Method)
Last changed    : 31/5/2022 1:07:56 PM by SYSTEM
Additional Info : Peak(s) manually integrated
=====
```

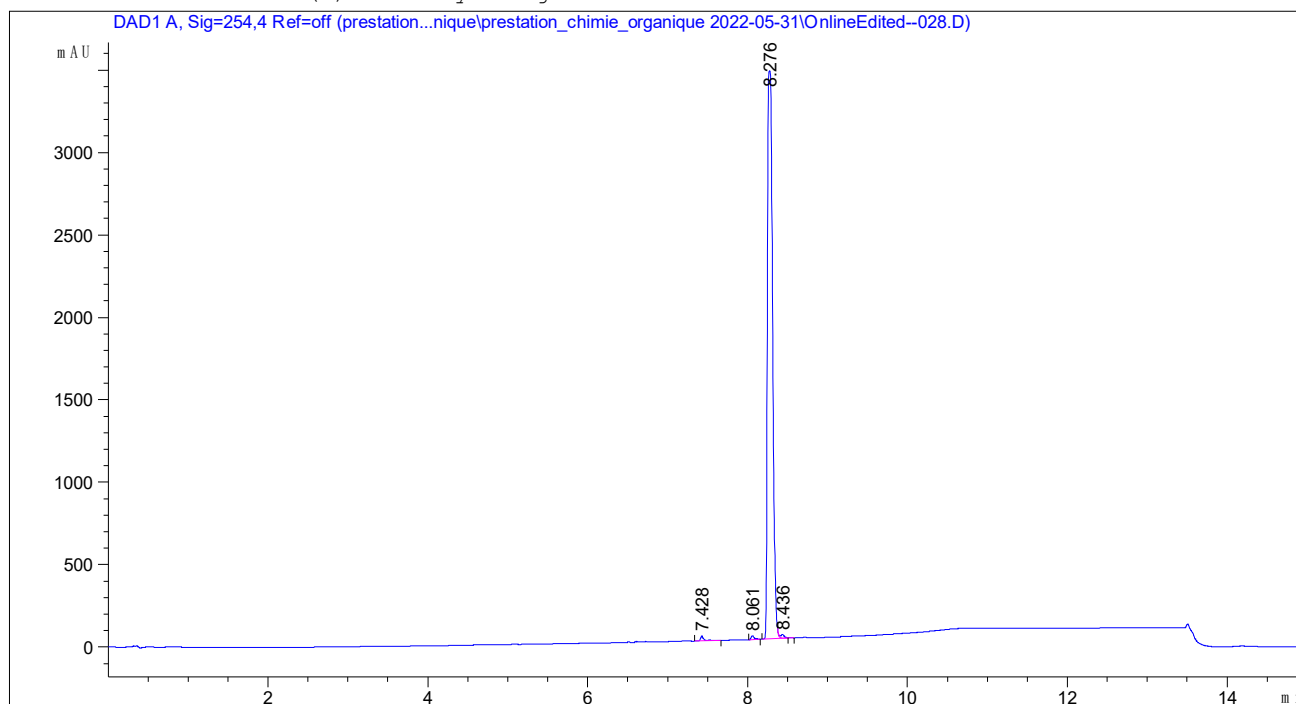

=====  
Area Percent Report  
=====

```
Sorted By      :      Signal
Multiplier     :      1.0000
Dilution       :      1.0000
Use Multiplier & Dilution Factor with ISTDs
```

Signal 1: DAD1 A, Sig=254,4 Ref=off

| Peak # | RetTime [min] | Type | Width [min] | Area [mAU*s] | Height [mAU] | Area %  |
|--------|---------------|------|-------------|--------------|--------------|---------|
| 1      | 7.428         | BV R | 0.0406      | 97.75952     | 29.26268     | 0.6318  |
| 2      | 8.061         | BV R | 0.0385      | 61.14993     | 23.35368     | 0.3952  |
| 3      | 8.276         | BV R | 0.0706      | 1.52385e4    | 3445.06177   | 98.4887 |
| 4      | 8.436         | VV E | 0.0455      | 74.92388     | 23.92803     | 0.4842  |

Totals :                      1.54724e4   3521.60615



## Compound 14b

2022-03-07

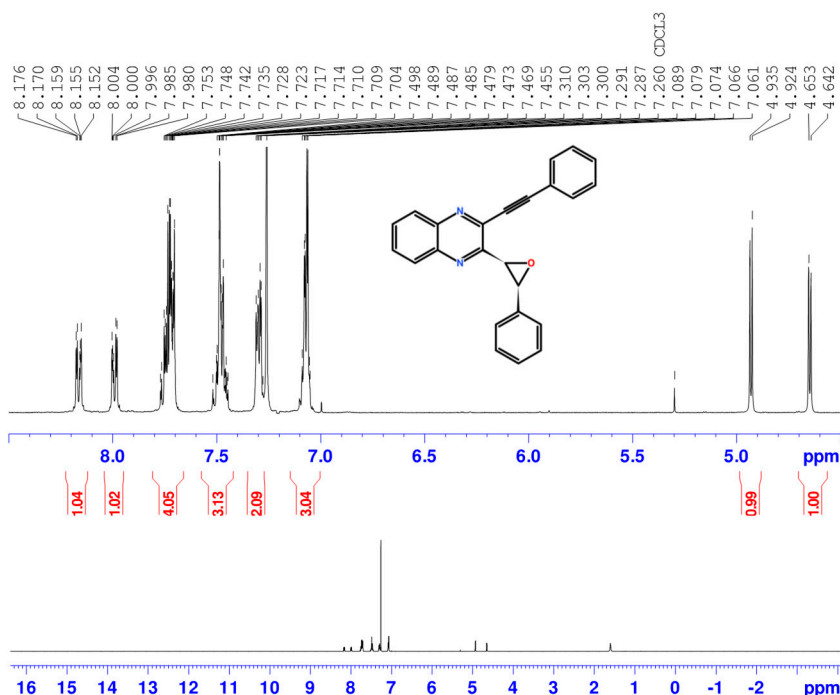

Current Data Parameters  
 NAME PEP32\_1H  
 EXPNO 20  
 PROCNO 1

F2 - Acquisition Parameters  
 Date\_ 20220307  
 Time 19.19 h  
 INSTRUM Avance NEO 400  
 PROBHD Z163739\_0130 ( )  
 PULPROG zg30  
 TD 65536  
 SOLVENT CDCl3  
 NS 16  
 DS 2  
 SWH 8196.722 Hz  
 FIDRES 0.250144 Hz  
 AQ 3.9976959 sec  
 RG 101  
 DW 61.000 usec  
 DE 13.97 usec  
 TE 298.0 K  
 D1 1.00000000 sec  
 TD0 1  
 SFO1 400.1324708 MHz  
 NUC1 1H  
 P0 2.51 usec  
 P1 7.53 usec  
 PLW1 22.80999947 W

F2 - Processing parameters  
 SI 65536  
 SF 400.1300102 MHz  
 WDW EM  
 SSB 0  
 LB 0.30 Hz  
 GB 0  
 PC 1.00

PEP32-Ph (2)

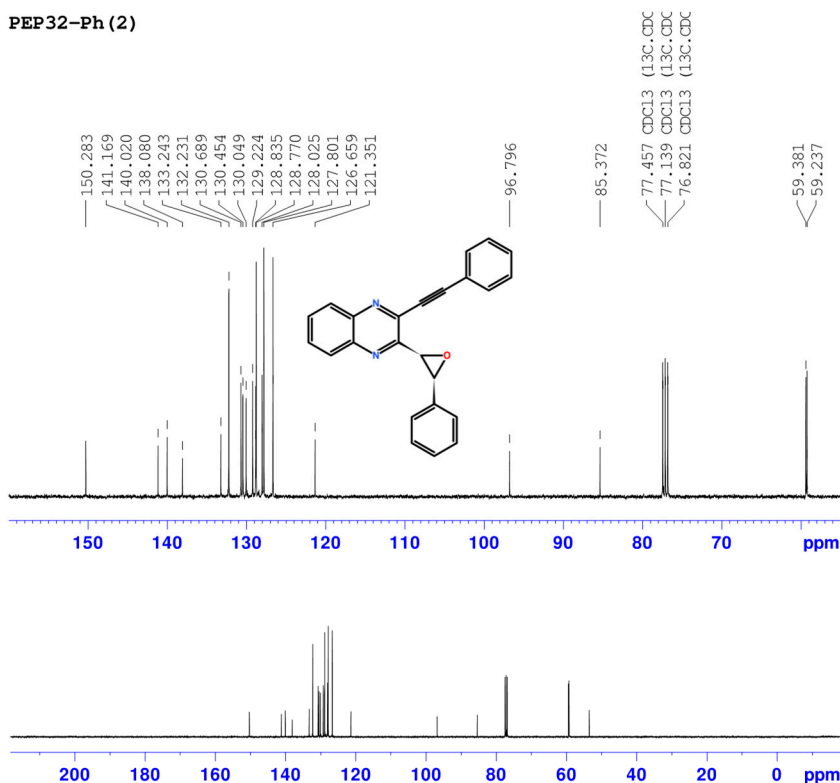

Current Data Parameters  
 NAME PEP32\_13C  
 EXPNO 11  
 PROCNO 1

F2 - Acquisition Parameters  
 Date\_ 20200622  
 Time 10.02 h  
 INSTRUM Avance NEO 400  
 PROBHD Z163739\_0130 ( )  
 PULPROG zgpg30  
 TD 65536  
 SOLVENT CDCl3  
 NS 68  
 DS 4  
 SWH 23809.523 Hz  
 FIDRES 0.726609 Hz  
 AQ 1.3762560 sec  
 RG 101  
 DW 21.000 usec  
 DE 6.50 usec  
 TE 298.1 K  
 D1 2.00000000 sec  
 D11 0.03000000 sec  
 TD0 1  
 SFO1 100.6228298 MHz  
 NUC1 13C  
 P0 2.67 usec  
 P1 8.00 usec  
 PLW1 95.56300354 W  
 SFO2 400.1316005 MHz  
 NUC2 1H  
 CPGPRG2 waltz65  
 PCPD2 90.00 usec  
 PLW2 22.80999947 W  
 PLW12 0.15967000 W  
 PLW13 0.08031400 W

F2 - Processing parameters  
 SI 32768  
 SF 100.6127685 MHz  
 WDW EM  
 SSB 0  
 LB 1.00 Hz  
 GB 0  
 PC 1.40

Data File C:\Chem32\...rganique\prestation\_chimie\_organique 2022-05-31\OnlineEdited--029.D  
Sample Name: PEP32

```
=====
Acq. Operator   : SYSTEM                      Seq. Line :   29
Acq. Instrument : LC1290                     Location  :   P1-D1
Injection Date  : 31/5/2022 8:34:27 PM        Inj       :    1
                                           Inj Volume: 1.000 µl
Method         : C:\Chem32\1\Data\prestation_chimie_organique\prestation_chimie_organique
                  2022-05-31\prestation_chimie_org.M (Sequence Method)
Last changed    : 31/5/2022 1:07:56 PM by SYSTEM
Additional Info : Peak(s) manually integrated
=====
```

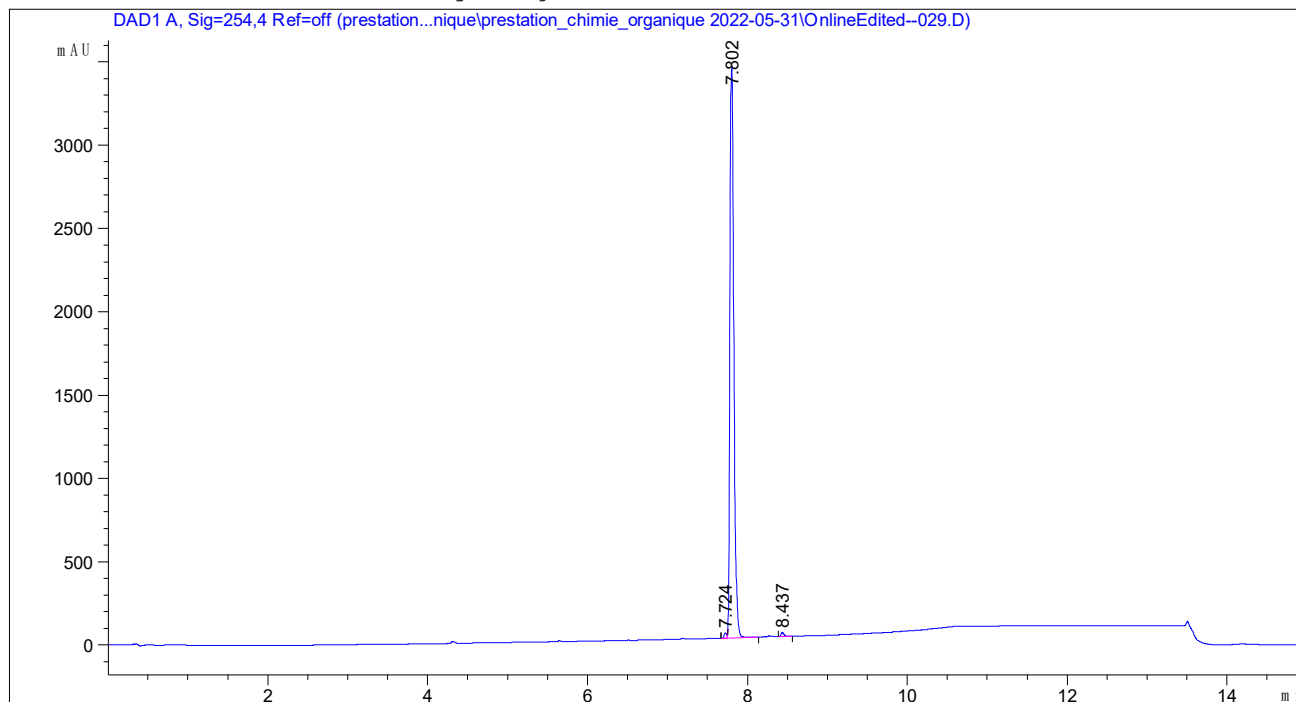

```
=====
                        Area Percent Report
=====
```

```
Sorted By      :      Signal
Multiplier     :      1.0000
Dilution       :      1.0000
Use Multiplier & Dilution Factor with ISTDs
```

Signal 1: DAD1 A, Sig=254,4 Ref=off

| Peak # | RetTime [min] | Type | Width [min] | Area [mAU*s] | Height [mAU] | Area %  |
|--------|---------------|------|-------------|--------------|--------------|---------|
| 1      | 7.724         | BV E | 0.0311      | 66.60098     | 32.21184     | 0.5599  |
| 2      | 7.802         | VV R | 0.0542      | 1.17595e4    | 3415.82910   | 98.8665 |
| 3      | 8.437         | BB   | 0.0407      | 68.22112     | 25.11445     | 0.5736  |

Totals : 1.18943e4 3473.15539

```
=====
*** End of Report ***
```

### Compound 15a

PEP36-Me

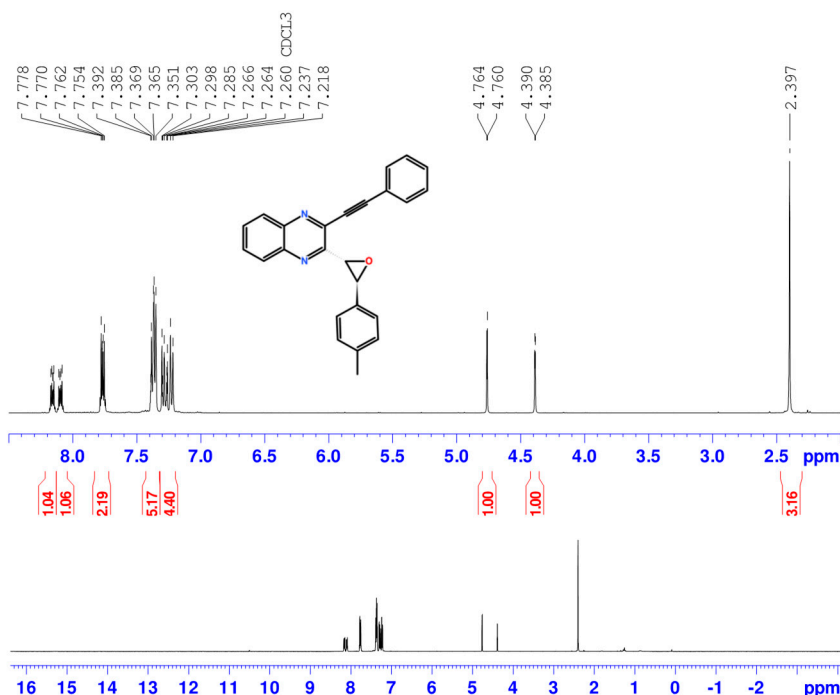

```

Current Data Parameters
NAME          PEP36_1H
EXPNO         10
PROCNO        1

F2 - Acquisition Parameters
Date_         20060611
Time          12.32 h
INSTRUM       Avance NEO 400
PROBHD        Z163739_0130 (
PULPROG       zg30
TD            65536
SOLVENT       CDCl3
NS            16
DS            2
SWH           8196.722 Hz
FIDRES       0.250144 Hz
AQ           3.9876959 sec
RG           49.6134
DE           61.0000 usec
DW           13.97 usec
TE           298.0 K
D1           1.0000000 sec
TD0          1
SFO1         400.1324708 MHz
NUC1         1H
P0           2.51 usec
P1           7.53 usec
PLN1         22.80999947 W

F2 - Processing parameters
SI            65536
SF           400.1300104 MHz
WDW          EM
SSB          0
LB           0.30 Hz
GB           0
PC           1.00

```

PEP36-Me

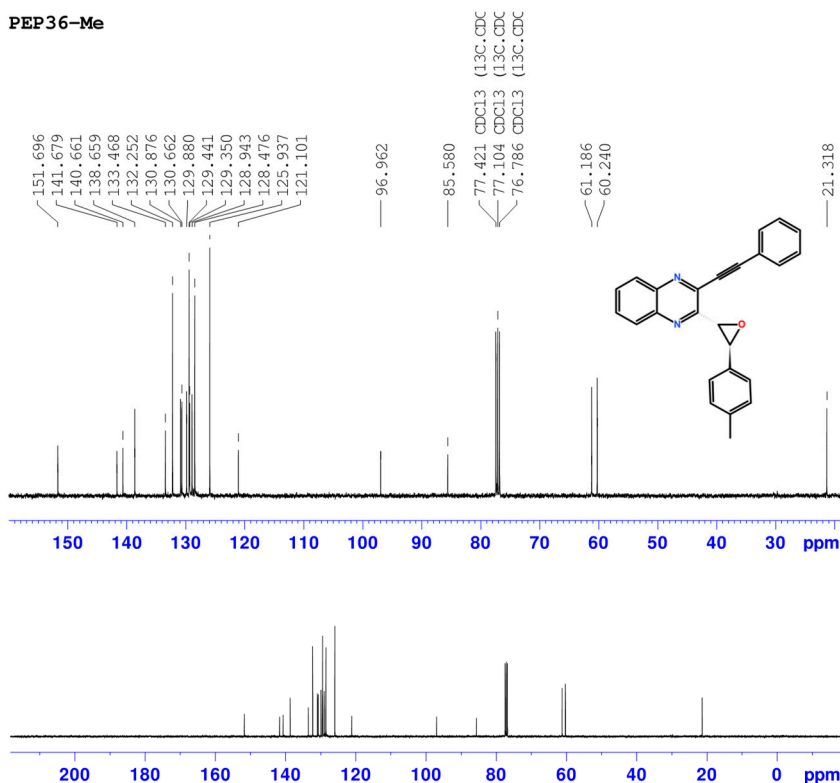

```

Current Data Parameters
NAME          PEP36_13C
EXPNO         11
PROCNO        1

F2 - Acquisition Parameters
Date_         20200622
Time          10:25 h
INSTRUM       Avance NEO 400
PROCPRG       T2b3793_0130
T2PROC        2D
DE            D2O
SOLVENT       CDCl3
NS            74
DS            4
SWH           23809.523 Hz
F2RES         0.73609 Hz
AQ            1.3762560 sec
RG            101
DQ            24
TE            29.000000 K
DE            6.50 K sec
DE           298.0 K
D1            2.00000000 sec
D11           0.03000000 sec
TD0           1
FID           160.6228298 MHz
NUC1          13C
P0            2.67 K sec
P1           81.5000000 sec
P1M1         95.5633333 MHz
SF2           400.1316000 MHz
NUC2          1H
F2PCF2(g2)    waltz16
PCF2          90.00 sec
PLM2          22.80939547 W
PLM1          0.15800000 W
PLM13         0.08034100 W

F2 - Processing parameters
S1            32768
SF            0.01627685 MHz
WDW           EM
SSB            0
GB            0.100 Hz
PC            1.40

```

Data File C:\Chem32\...rganique\prestation\_chimie\_organique 2022-05-31\OnlineEdited--033.D  
 Sample Name: PEP36

```
=====
Acq. Operator   : SYSTEM                      Seq. Line :   33
Acq. Instrument : LC1290                     Location  :   P1-D5
Injection Date  : 31/5/2022 9:37:33 PM        Inj       :    1
                                           Inj Volume: 1.000 µl
Method          : C:\Chem32\1\Data\prestation_chimie_organique\prestation_chimie_organique
                  2022-05-31\prestation_chimie_org.M (Sequence Method)
Last changed    : 31/5/2022 1:07:56 PM by SYSTEM
Additional Info : Peak(s) manually integrated
=====
```

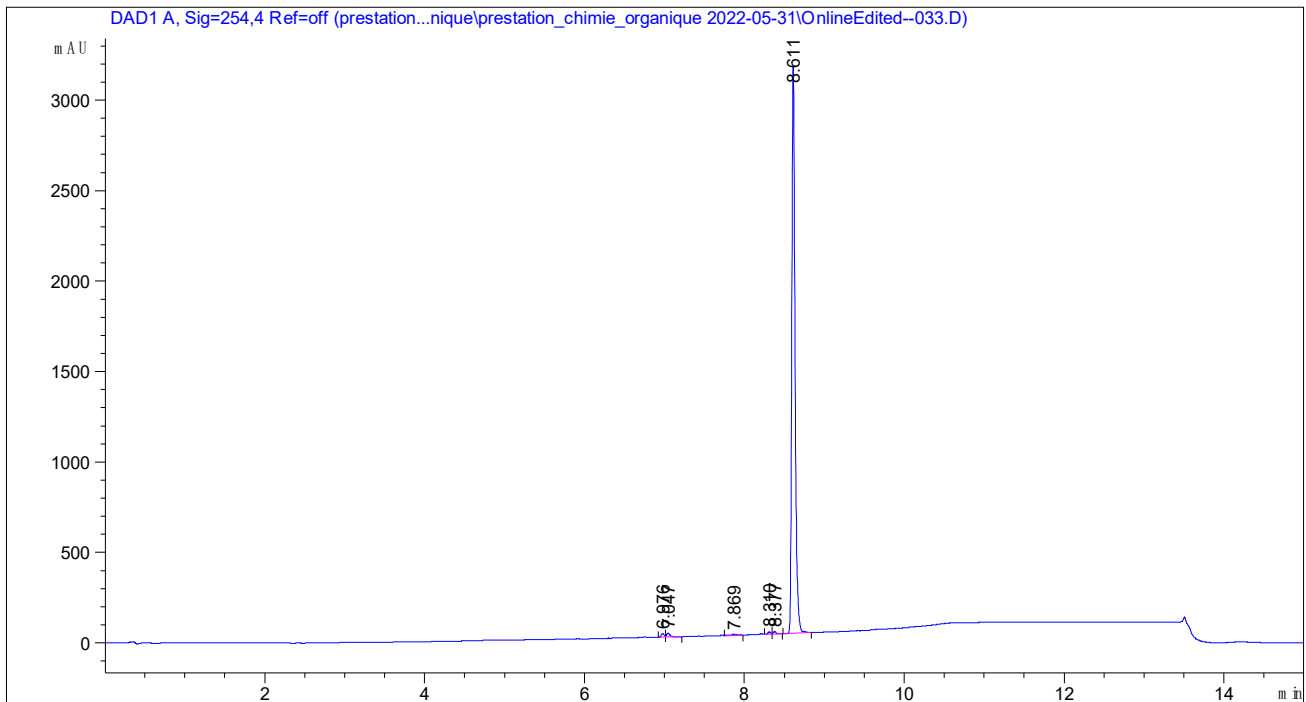

=====  
 Area Percent Report  
 =====

```
Sorted By      :      Signal
Multiplier     :      1.0000
Dilution       :      1.0000
Use Multiplier & Dilution Factor with ISTDs
```

Signal 1: DAD1 A, Sig=254,4 Ref=off

| Peak # | RetTime [min] | Type | Width [min] | Area [mAU*s] | Height [mAU] | Area %  |
|--------|---------------|------|-------------|--------------|--------------|---------|
| 1      | 6.976         | BV   | 0.0355      | 48.41981     | 20.56596     | 0.5397  |
| 2      | 7.047         | VV R | 0.0431      | 63.91540     | 21.88852     | 0.7124  |
| 3      | 7.869         | BV R | 0.0418      | 21.84160     | 7.54534      | 0.2434  |
| 4      | 8.310         | VV   | 0.0395      | 31.09993     | 11.91477     | 0.3466  |
| 5      | 8.377         | VB   | 0.0430      | 38.39138     | 13.18491     | 0.4279  |
| 6      | 8.611         | BV R | 0.0436      | 8768.56152   | 3133.93701   | 97.7300 |

Totals : 8972.22963 3209.03651

PEP46 2022-03-03

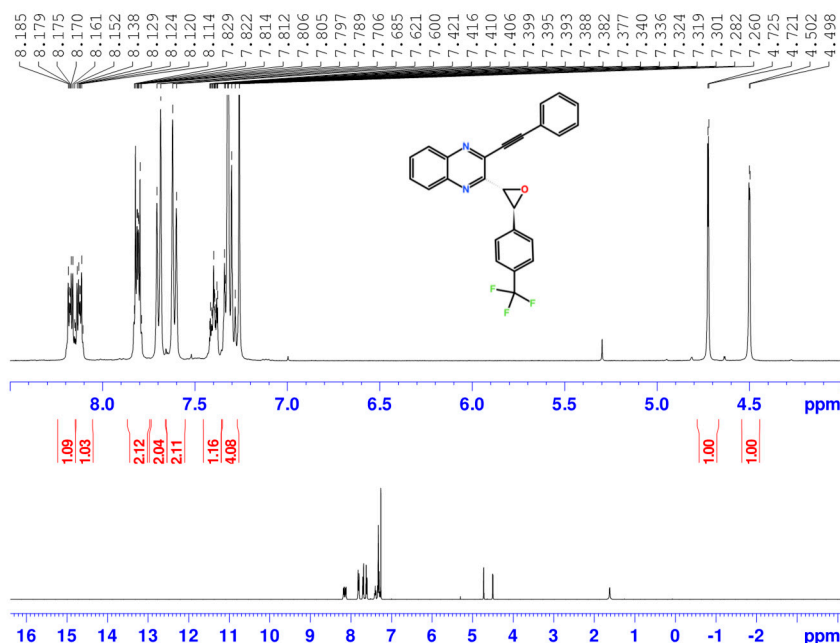

```

Current Data Parameters
NAME          PEP46_1H
EXPNO         10
PROCNO        1

F2 - Acquisition Parameters
Date_         2022030
Time          20.04 h
INSTRUM       Avance NEO 400
PROBHD        Z163739_0130 (
PULPROG       zg30
TD            65536
SOLVENT       CDCl3
NS            16
DS            2
SWH            8196.722 Hz
FIDRES        0.250144 Hz
AQ            3.9975959 sec
RG            101
DE            61.0000 usec
DW            13.97 usec
TE            298.0 K
D1            1.0000000 sec
TD0           1
NUC1           400.1324708 MHz
SFO1          1H
P0            2.51 usec
P1            7.53 usec
PLW1          22.80999947 W

F2 - Processing parameters
SI            65536
SF            400.1300103 MHz
WDW           EM
SSB           0
LB            0.30 Hz
GB            0
PC            1.00

```

2022-03-07

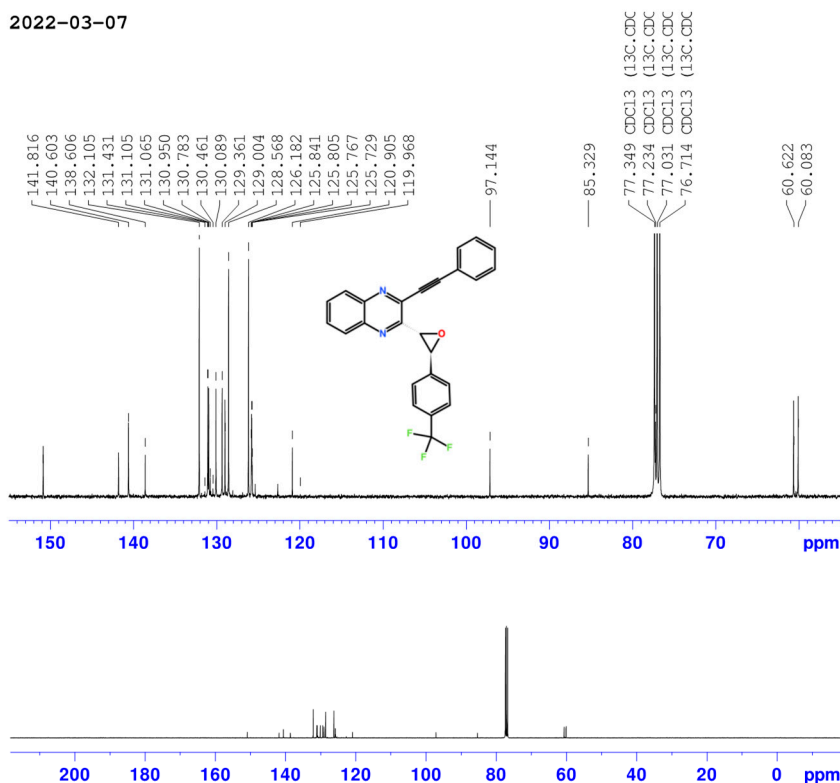

|                             |                     |
|-----------------------------|---------------------|
| Current Data Parameters     |                     |
| NAME                        | PEP46_1JC           |
| EXPNO                       | 10                  |
| PROCNO                      | 1                   |
| F2 - Acquisition Parameters |                     |
| Date_                       | 20220308            |
| Time                        | 02:20:23            |
| INSTRUM                     | Avance NEO 400      |
| PROBHD                      | Z163739_0130        |
| SOLVENT                     | DMSO-d <sub>6</sub> |
| TD                          | 65336               |
| DS                          | CDCl <sub>3</sub>   |
| SWH                         | 5000                |
| DSH                         | 4                   |
| F2                          | 238959.523 Hz       |
| F2RES                       | 0.76799 Hz          |
| AQ                          | 1.3762560 sec       |
| RQ                          | 101                 |
| DE                          | 21.000 usec         |
| TE                          | 6.980 K             |
| D1                          | 2.00000000 sec      |
| D11                         | 0.03000000 sec      |
| TD0                         | 1                   |
| SF01                        | 100.6228798 MHz     |
| F1                          | 31C                 |
| P1                          | 2.67 usec           |
| P2                          | 8.00 usec           |
| PL1                         | 95.5631541 W        |
| PL2                         | 400.1313605 W       |
| MUC2                        | 1H                  |
| CPDPRG2                     | waltz65             |
| PCPD2                       | 90.00 sec           |
| PLK2                        | 22.809399547 W      |
| WFL2                        | 0.15980000 W        |
| PLM13                       | 0.08031400 W        |
| F2 - Processing parameters  |                     |
| S1                          | 32768               |
| WF                          | 100.6127665 MHz     |
| SG                          | EM                  |
| SSB                         | 0                   |
| LB                          | 1.00 Hz             |
| FC                          | 0                   |
| PC                          | 1.40                |

Data File C:\Chem32\...\rganique\prestation\_chimie\_organique 2022-05-31\OnlineEdited--037.D  
Sample Name: PEP46

```
=====
Acq. Operator   : SYSTEM                      Seq. Line :   37
Acq. Instrument : LC1290                     Location  :   P1-D9
Injection Date  : 31/5/2022 10:40:39 PM      Inj       :    1
                                           Inj Volume: 1.000 µl
Method          : C:\Chem32\1\Data\prestation_chimie_organique\prestation_chimie_organique
                  2022-05-31\prestation_chimie_org.M (Sequence Method)
Last changed    : 31/5/2022 1:07:56 PM by SYSTEM
Additional Info  : Peak(s) manually integrated
=====
```

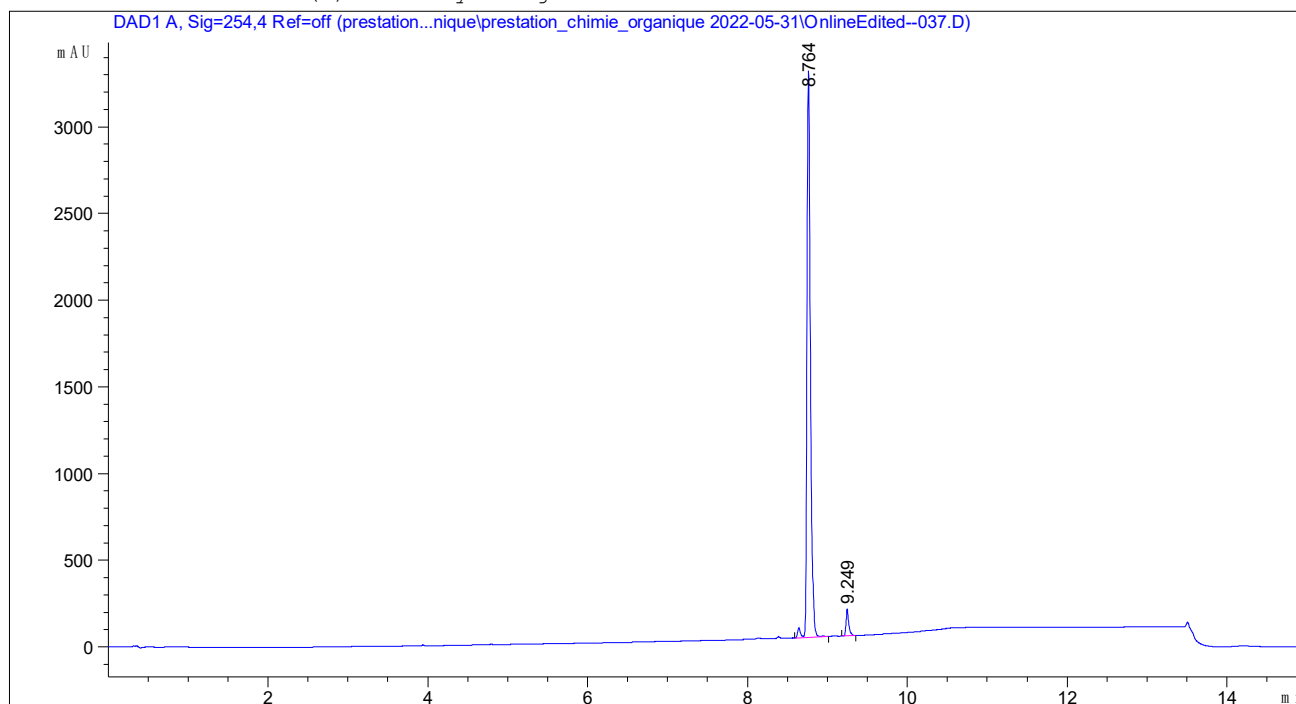

```
=====
                        Area Percent Report
=====
```

```
Sorted By      :      Signal
Multiplier     :      1.0000
Dilution       :      1.0000
Use Multiplier & Dilution Factor with ISTDs
```

Signal 1: DAD1 A, Sig=254,4 Ref=off

| Peak # | RetTime [min] | Type | Width [min] | Area [mAU*s] | Height [mAU] | Area %  |
|--------|---------------|------|-------------|--------------|--------------|---------|
| 1      | 8.764         | VV R | 0.0447      | 9592.59277   | 3268.00439   | 96.1767 |
| 2      | 9.249         | BB   | 0.0366      | 381.33215    | 155.64145    | 3.8233  |

Totals : 9973.92493 3423.64584

```
=====
                        *** End of Report ***
=====
```

## Compound 16b

PEP47 2022-03-03

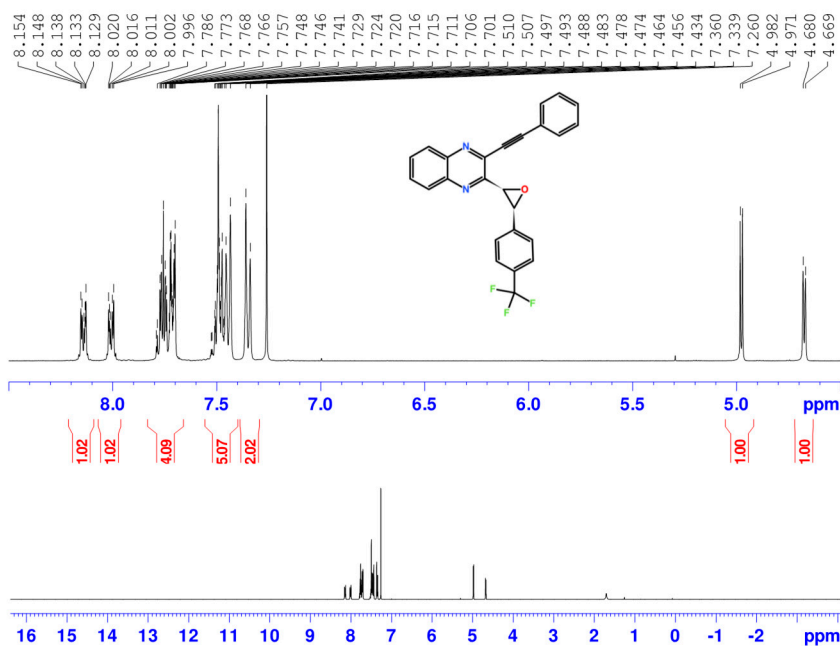

Current Data Parameters  
 NAME PEP47\_1H  
 EXPNO 10  
 PROCNO 1

F2 - Acquisition Parameters  
 Date\_ 20220303  
 Time 20.12 h  
 INSTRUM Avance NEO 400  
 PROBHD Z163739\_0130 ( )  
 PULPROG zg30  
 TD 65536  
 SOLVENT CDCl3  
 NS 16  
 DS 2  
 SWH 8196.722 Hz  
 FIDRES 0.250144 Hz  
 AQ 3.9976959 sec  
 RG 101  
 DW 61.000 usec  
 DE 13.97 usec  
 TE 298.0 K  
 D1 1.00000000 sec  
 TD0 1  
 SFO1 400.1324708 MHz  
 NUC1 1H  
 P0 2.51 usec  
 P1 7.53 usec  
 PLW1 22.80999947 W

F2 - Processing parameters  
 SI 65536  
 SF 400.1300103 MHz  
 WDW EM  
 SSB 0  
 LB 0.30 Hz  
 GB 0  
 PC 1.00

2022-03-07

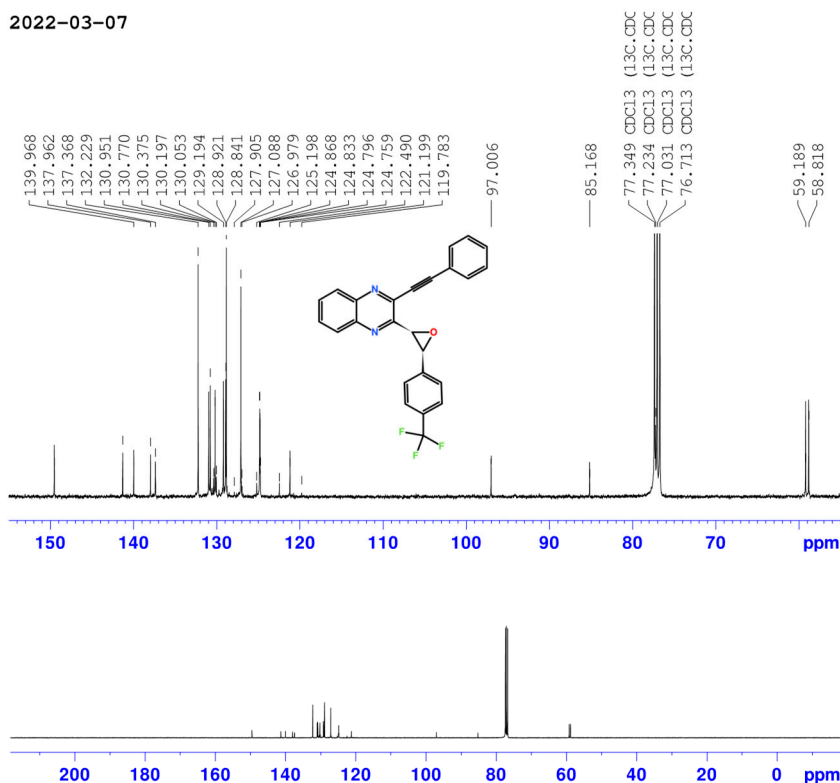

Current Data Parameters  
 NAME PEP47\_13C  
 EXPNO 10  
 PROCNO 1

F2 - Acquisition Parameters  
 Date\_ 20220308  
 Time 3.57 h  
 INSTRUM Avance NEO 400  
 PROBHD Z163739\_0130 ( )  
 PULPROG zgpg30  
 TD 65536  
 SOLVENT CDCl3  
 NS 5000  
 DS 4  
 SWH 23809.523 Hz  
 FIDRES 0.726609 Hz  
 AQ 1.3762560 sec  
 RG 101  
 DW 21.000 usec  
 DE 6.50 usec  
 TE 298.0 K  
 D1 2.00000000 sec  
 D11 0.03000000 sec  
 TD0 1  
 SFO1 100.6228298 MHz  
 NUC1 13C  
 P0 2.67 usec  
 P1 8.00 usec  
 PLW1 95.56300354 W  
 SFO2 400.1316005 MHz  
 NUC2 1H  
 CPGPRG2 waltz65  
 PCPD2 90.00 usec  
 PLW2 22.80999947 W  
 PLW12 0.15967000 W  
 PLW13 0.08031400 W

F2 - Processing parameters  
 SI 32768  
 SF 100.6127685 MHz  
 WDW EM  
 SSB 0  
 LB 1.00 Hz  
 GB 0  
 PC 1.40

Data File C:\Chem32\...rganique\prestation\_chimie\_organique 2022-05-31\OnlineEdited--038.D  
 Sample Name: PEP47

```
=====
Acq. Operator   : SYSTEM                      Seq. Line :   38
Acq. Instrument : LC1290                     Location  :   P1-E1
Injection Date  : 31/5/2022 10:56:24 PM      Inj       :    1
                                           Inj Volume: 1.000 µl
Method          : C:\Chem32\1\Data\prestation_chimie_organique\prestation_chimie_organique
                  2022-05-31\prestation_chimie_org.M (Sequence Method)
Last changed    : 31/5/2022 1:07:56 PM by SYSTEM
Additional Info : Peak(s) manually integrated
=====
```

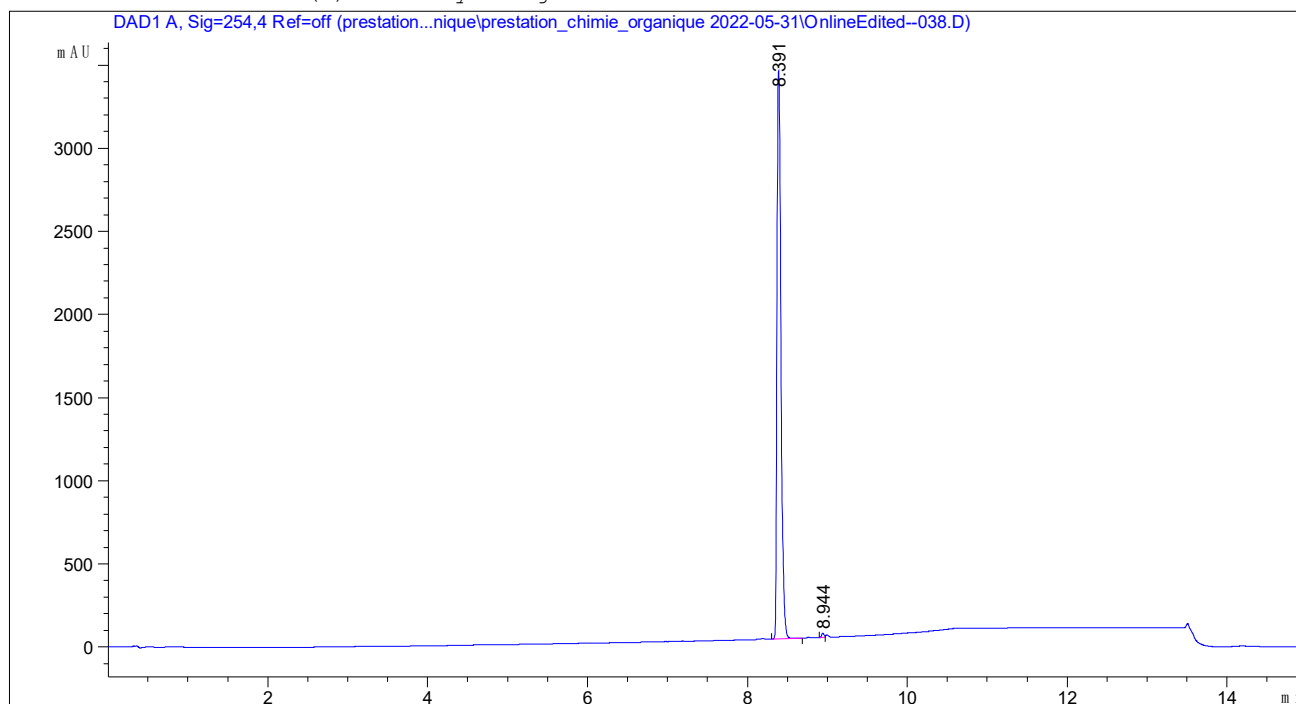

=====  
 Area Percent Report  
 =====

```
Sorted By      :      Signal
Multiplier     :      1.0000
Dilution       :      1.0000
Use Multiplier & Dilution Factor with ISTDs
```

Signal 1: DAD1 A, Sig=254,4 Ref=off

| Peak # | RetTime [min] | Type | Width [min] | Area [mAU*s] | Height [mAU] | Area %  |
|--------|---------------|------|-------------|--------------|--------------|---------|
| 1      | 8.391         | BV R | 0.0553      | 1.21017e4    | 3417.00098   | 99.5291 |
| 2      | 8.944         | BV   | 0.0337      | 57.26093     | 26.04416     | 0.4709  |

Totals :                      1.21589e4   3443.04514

=====  
 \*\*\* End of Report \*\*\*



## Compound 17a

PEP25-4C1

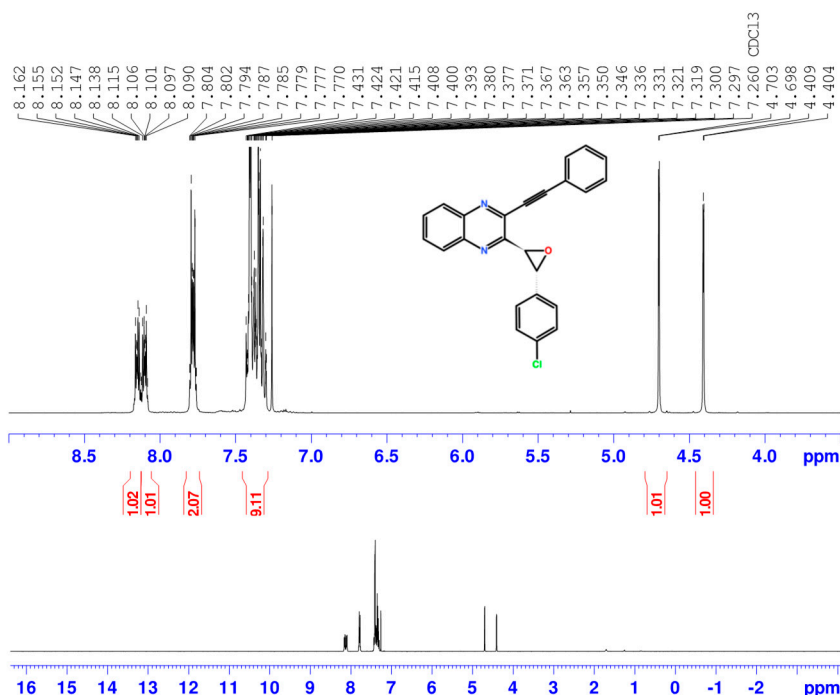

Current Data Parameters  
 NAME PEP25\_1H  
 EXPNO 10  
 PROCNO 1

F2 - Acquisition Parameters  
 Date\_ 20200619  
 Time 11.38 h  
 INSTRUM Avance NEO 400  
 PROBHD Z163739\_0130 ( )  
 PULPROG zg30  
 TD 65536  
 SOLVENT CDCl3  
 NS 16  
 DS 2  
 SWH 8196.722 Hz  
 FIDRES 0.250144 Hz  
 AQ 3.9976959 sec  
 RG 101  
 DW 61.000 usec  
 DE 13.97 usec  
 TE 298.0 K  
 D1 1.00000000 sec  
 TD0 1  
 SFO1 400.1324708 MHz  
 NUC1 1H  
 P0 2.51 usec  
 P1 7.53 usec  
 PLW1 22.80999947 W

F2 - Processing parameters  
 SI 65536  
 SF 400.1300105 MHz  
 WDW EM  
 SSB 0  
 LB 0.30 Hz  
 GB 0  
 PC 1.00

PEP25-4C1

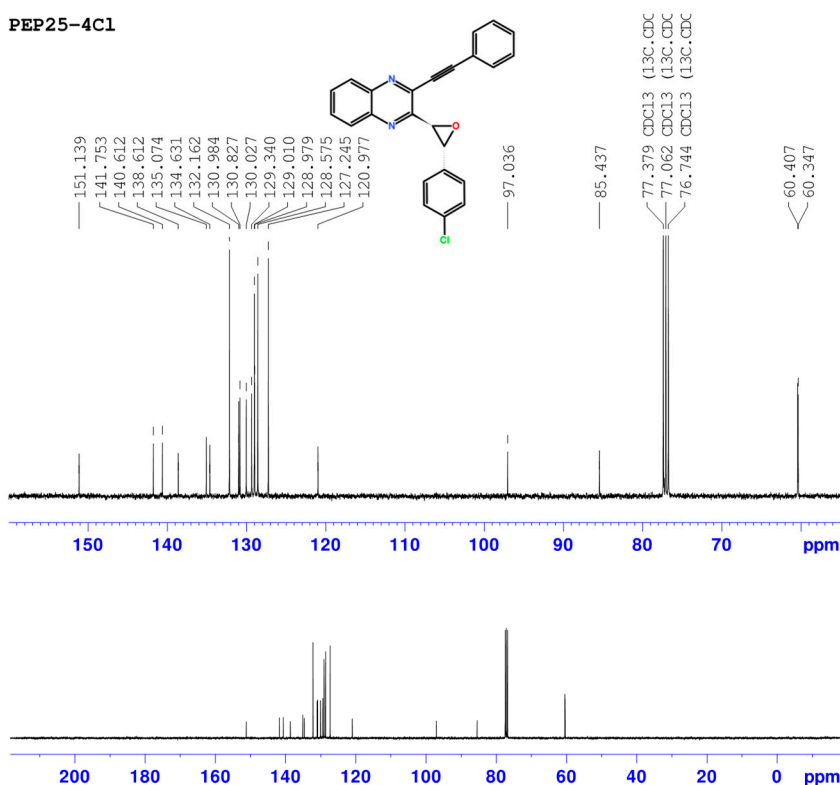

Current Data Parameters  
 NAME PEP25\_13C  
 EXPNO 11  
 PROCNO 1

F2 - Acquisition Parameters  
 Date\_ 20200619  
 Time 14.03 h  
 INSTRUM Avance NEO 400  
 PROBHD Z163739\_0130 ( )  
 PULPROG zgpg30  
 TD 65536  
 SOLVENT CDCl3  
 NS 136  
 DS 4  
 SWH 23809.523 Hz  
 FIDRES 0.726609 Hz  
 AQ 1.3762560 sec  
 RG 101  
 DW 21.000 usec  
 DE 6.50 usec  
 TE 298.0 K  
 D1 2.00000000 sec  
 D11 0.03000000 sec  
 TD0 1  
 SFO1 100.628298 MHz  
 NUC1 13C  
 P0 2.67 usec  
 P1 8.00 usec  
 PLW1 95.56300354 W  
 SFO2 400.1316005 MHz  
 NUC2 1H  
 CPGPRG2 waltz16  
 PCPD2 90.00 usec  
 PLW2 22.80999947 W  
 PLW12 0.15967000 W  
 PLW13 0.08031400 W

F2 - Processing parameters  
 SI 32768  
 SF 100.6127685 MHz  
 WDW EM  
 SSB 0  
 LB 1.00 Hz  
 GB 0  
 PC 1.40

Data File C:\Chem32\...rganique\prestation\_chimie\_organique 2022-05-31\OnlineEdited--023.D  
Sample Name: PEP25

```
=====
Acq. Operator   : SYSTEM                      Seq. Line :   23
Acq. Instrument : LC1290                     Location  :   P1-C4
Injection Date  : 31/5/2022 6:59:40 PM        Inj       :    1
                                           Inj Volume: 1.000 µl
Method         : C:\Chem32\1\Data\prestation_chimie_organique\prestation_chimie_organique
                  2022-05-31\prestation_chimie_org.M (Sequence Method)
Last changed    : 31/5/2022 1:07:56 PM by SYSTEM
Additional Info : Peak(s) manually integrated
=====
```

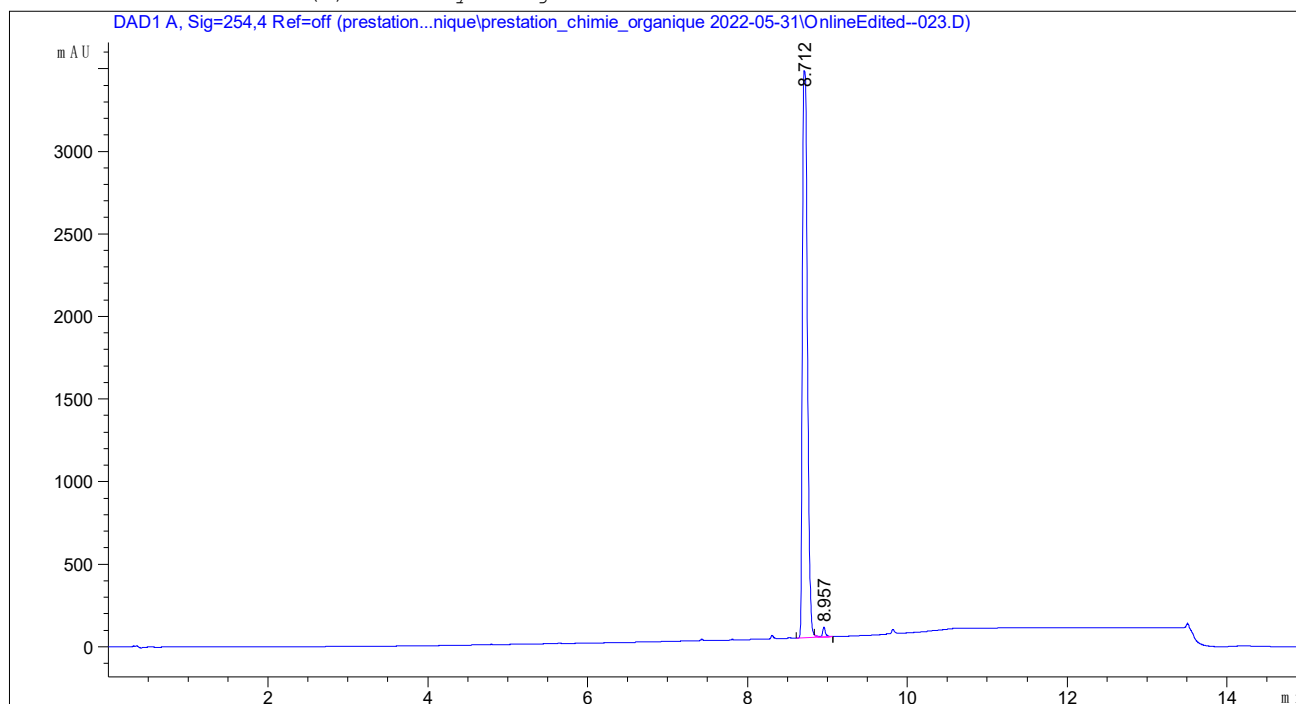

```
=====
                        Area Percent Report
=====
```

```
Sorted By      :      Signal
Multiplier     :      1.0000
Dilution       :      1.0000
Use Multiplier & Dilution Factor with ISTDs
```

Signal 1: DAD1 A, Sig=254,4 Ref=off

| Peak # | RetTime [min] | Type | Width [min] | Area [mAU*s] | Height [mAU] | Area %  |
|--------|---------------|------|-------------|--------------|--------------|---------|
| 1      | 8.712         | BV R | 0.0699      | 1.52815e4    | 3433.02393   | 98.9401 |
| 2      | 8.957         | VB E | 0.0405      | 163.70430    | 58.79041     | 1.0599  |

Totals :                      1.54452e4   3491.81433

```
=====
*** End of Report ***
```

## Compound 17b

PEP26-4C1

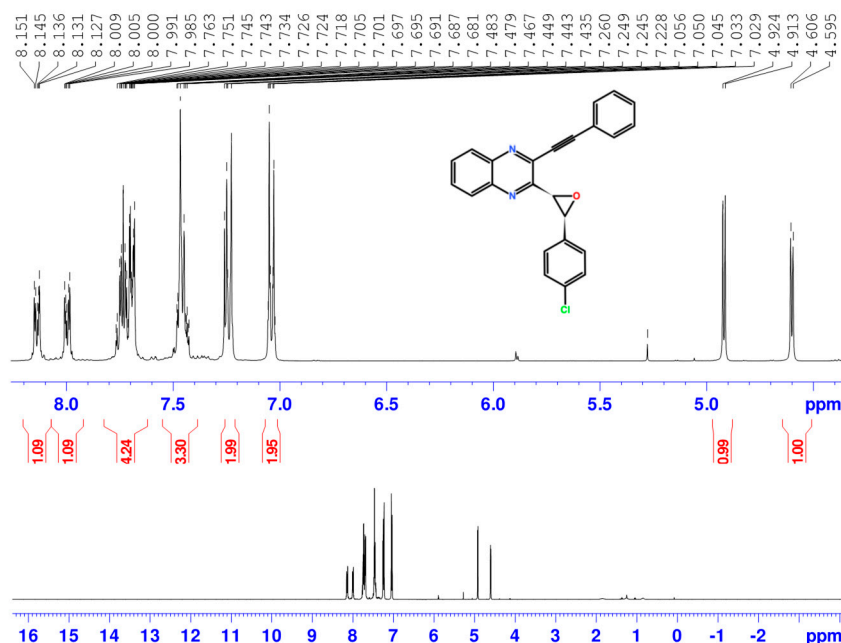

PEP26-4C1

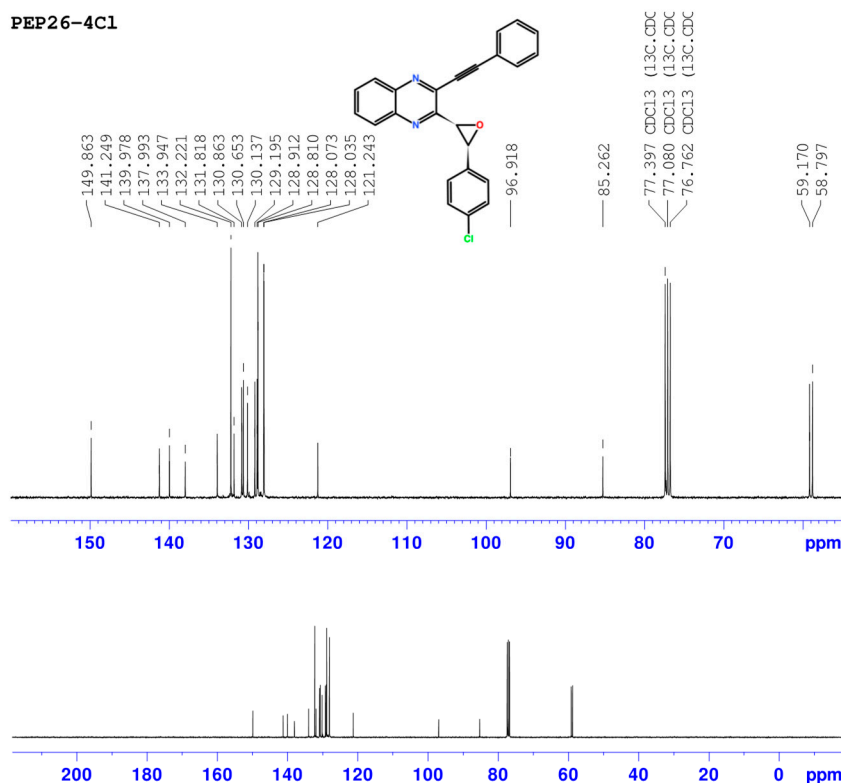

Data File C:\Chem32\...rganique\prestation\_chimie\_organique 2022-05-31\OnlineEdited--024.D  
Sample Name: PEP26

```
=====
Acq. Operator   : SYSTEM                      Seq. Line :   24
Acq. Instrument : LC1290                     Location  :   P1-C5
Injection Date  : 31/5/2022 7:15:28 PM        Inj       :    1
                                           Inj Volume: 1.000 µl
Method          : C:\Chem32\1\Data\prestation_chimie_organique\prestation_chimie_organique
                  2022-05-31\prestation_chimie_org.M (Sequence Method)
Last changed    : 31/5/2022 1:07:56 PM by SYSTEM
Additional Info : Peak(s) manually integrated
=====
```

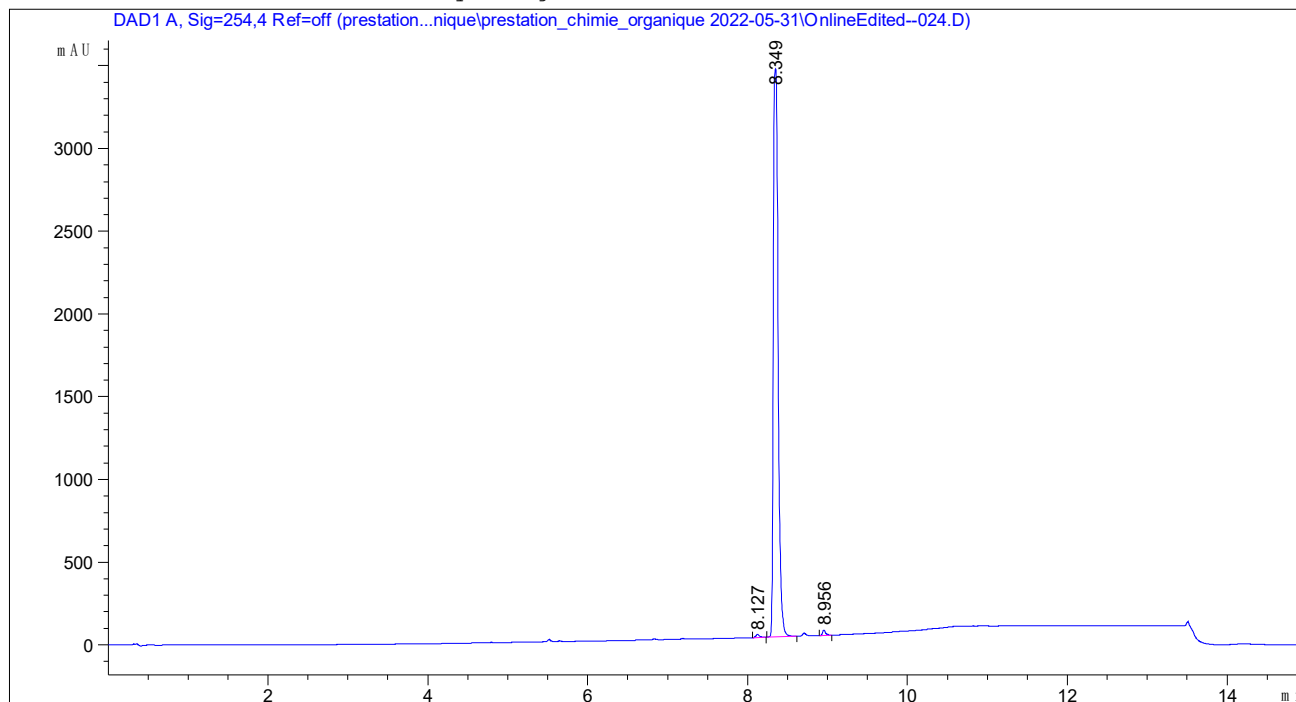

```
=====
                        Area Percent Report
=====
```

```
Sorted By      :      Signal
Multiplier     :      1.0000
Dilution       :      1.0000
Use Multiplier & Dilution Factor with ISTDs
```

Signal 1: DAD1 A, Sig=254,4 Ref=off

| Peak # | RetTime [min] | Type | Width [min] | Area [mAU*s] | Height [mAU] | Area %  |
|--------|---------------|------|-------------|--------------|--------------|---------|
| 1      | 8.127         | BB   | 0.0455      | 56.93033     | 18.73463     | 0.3922  |
| 2      | 8.349         | BV R | 0.0659      | 1.43769e4    | 3432.73145   | 99.0429 |
| 3      | 8.956         | BB   | 0.0375      | 81.99546     | 32.43653     | 0.5649  |

Totals : 1.45158e4 3483.90261

```
=====
*** End of Report ***
```

## Compound 18a

PEP29-2C1

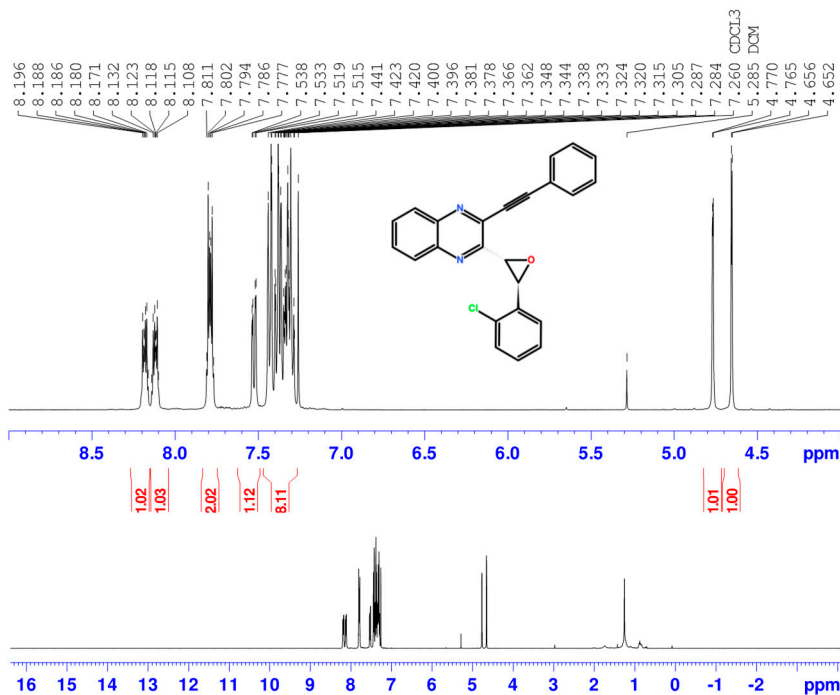

Current Data Parameters  
 NAME PEP29\_1H  
 EXPNO 10  
 PROCNO 1

F2 - Acquisition Parameters  
 Date\_ 20200619  
 Time 11.51 h  
 INSTRUM Avance NEO 400  
 PROBHD Z163739\_0130 (zgc30)  
 PULPROG zg30  
 TD 65536  
 SOLVENT CDCl3  
 NS 16  
 DS 2  
 SWH 8196.722 Hz  
 FIDRES 0.250144 Hz  
 AQ 3.9976959 sec  
 RG 72.741  
 DW 61.000 usec  
 DE 13.97 usec  
 TE 298.0 K  
 D1 1.00000000 sec  
 TD0 1  
 SFO1 400.1324708 MHz  
 NUC1 1H  
 P0 2.51 usec  
 P1 7.53 usec  
 PLW1 22.80999947 W

F2 - Processing parameters  
 SI 65536  
 SF 400.1300105 MHz  
 WDW EM  
 SSB 0  
 LB 0.30 Hz  
 GB 0  
 PC 1.00

PEP29-2C1

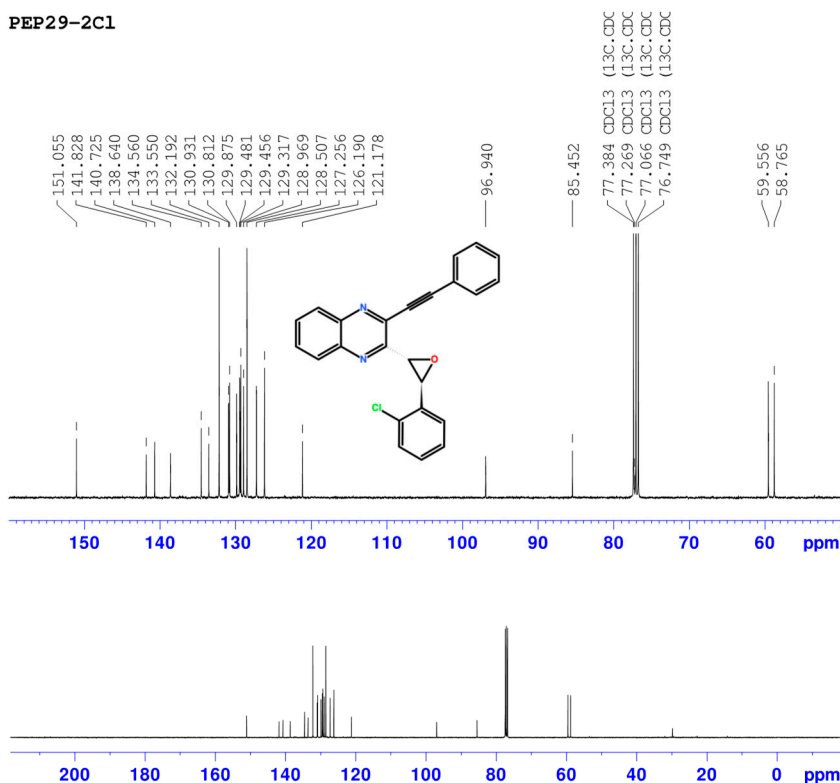

Current Data Parameters  
 NAME PEP29\_13C  
 EXPNO 11  
 PROCNO 1

F2 - Acquisition Parameters  
 Date\_ 20200620  
 Time 11.00 h  
 INSTRUM Avance NEO 400  
 PROBHD Z163739\_0130 (zgpg30)  
 PULPROG zgpg30  
 TD 65536  
 SOLVENT CDCl3  
 NS 800  
 DS 4  
 SWH 23809.523 Hz  
 FIDRES 0.726609 Hz  
 AQ 1.3762560 sec  
 RG 101  
 DW 21.000 usec  
 DE 6.50 usec  
 TE 298.0 K  
 D1 2.00000000 sec  
 D11 0.03000000 sec  
 TD0 1  
 SFO1 100.6228298 MHz  
 NUC1 13C  
 P0 2.67 usec  
 P1 8.00 usec  
 PLW1 95.56300354 W  
 SFO2 400.1316005 MHz  
 NUC2 1H  
 CPGPRG2 waltz16  
 PCPD2 90.00 usec  
 PLW2 22.80999947 W  
 PLW12 0.15967000 W  
 PLW13 0.08031400 W

F2 - Processing parameters  
 SI 32768  
 SF 100.6127685 MHz  
 WDW EM  
 SSB 0  
 LB 1.00 Hz  
 GB 0  
 PC 1.40

Data File C:\Chem32\...\rganique\prestation\_chimie\_organique 2022-05-31\OnlineEdited--027.D  
Sample Name: PEP29

```
=====
Acq. Operator   : SYSTEM                      Seq. Line :   27
Acq. Instrument : LC1290                     Location  :   P1-C8
Injection Date  : 31/5/2022 8:02:51 PM        Inj       :    1
                                           Inj Volume: 1.000 µl
Method         : C:\Chem32\1\Data\prestation_chimie_organique\prestation_chimie_organique
                  2022-05-31\prestation_chimie_org.M (Sequence Method)
Last changed    : 31/5/2022 1:07:56 PM by SYSTEM
Additional Info : Peak(s) manually integrated
=====
```

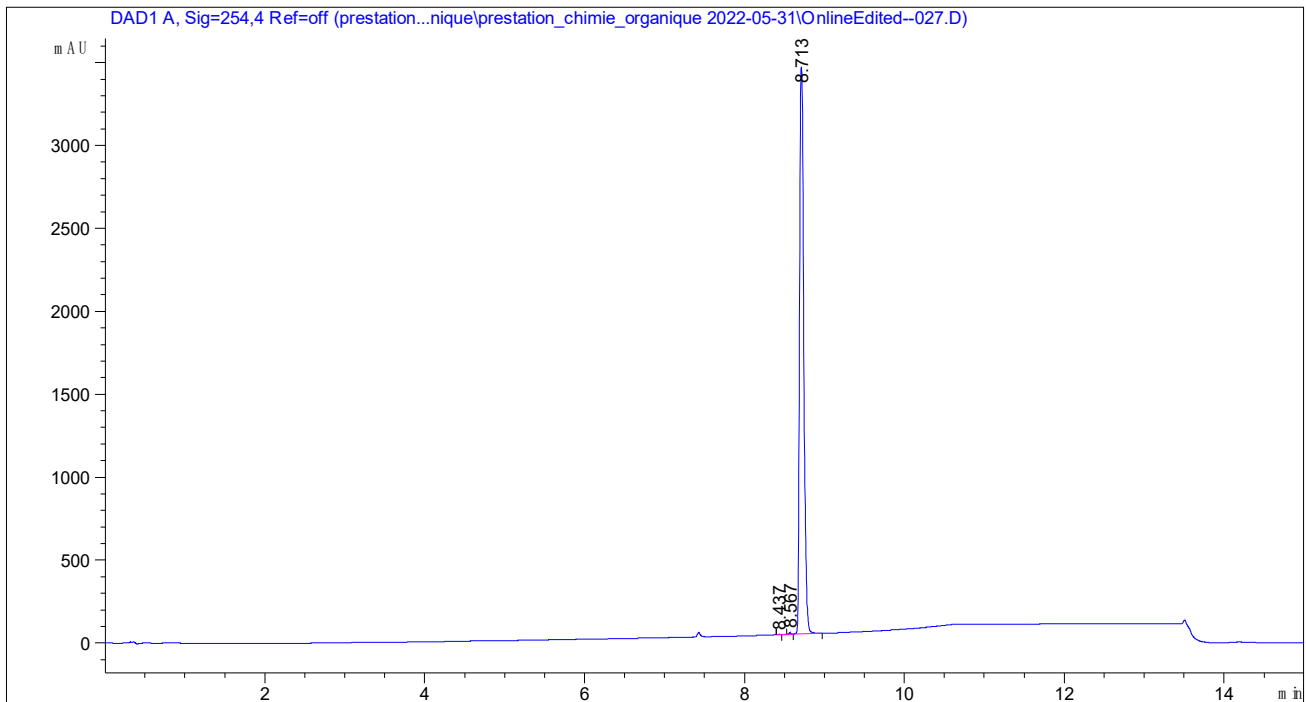

```
=====
                          Area Percent Report
=====
```

```
Sorted By      :      Signal
Multiplier     :      1.0000
Dilution       :      1.0000
Use Multiplier & Dilution Factor with ISTDs
```

Signal 1: DAD1 A, Sig=254,4 Ref=off

| Peak # | RetTime [min] | Type | Width [min] | Area [mAU*s] | Height [mAU] | Area %  |
|--------|---------------|------|-------------|--------------|--------------|---------|
| 1      | 8.437         | BV E | 0.0319      | 5.31774      | 2.60060      | 0.0432  |
| 2      | 8.567         | VV E | 0.0336      | 21.93933     | 9.98431      | 0.1781  |
| 3      | 8.713         | VB R | 0.0570      | 1.22946e4    | 3418.70166   | 99.7788 |

Totals : 1.23218e4 3431.28657

```
=====
*** End of Report ***
```

## Compound 19a

PEP27-4F

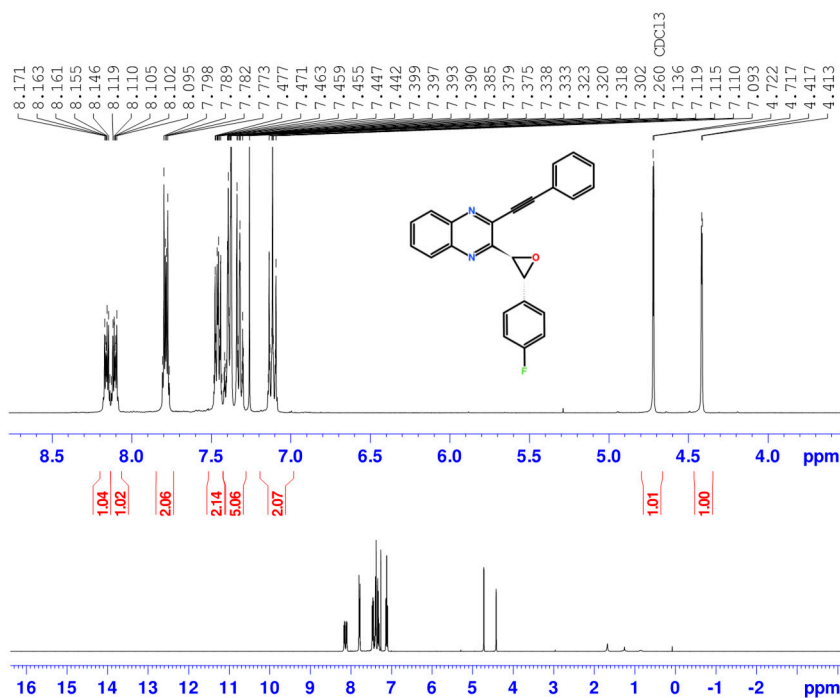

Current Data Parameters  
 NAME PEP27\_1H  
 EXPNO 10  
 PROCNO 1

F2 - Acquisition Parameters  
 Date\_ 20200619  
 Time 15.22 h  
 INSTRUM Avance NEO 400  
 PROBHD Z163739\_0130 (zg30)  
 PULPROG zg30  
 TD 65536  
 SOLVENT CDCl3  
 NS 16  
 DS 2  
 SWH 8196.722 Hz  
 FIDRES 0.250144 Hz  
 AQ 3.9976959 sec  
 RG 101  
 DW 61.000 usec  
 DE 13.97 usec  
 TE 298.0 K  
 D1 1.00000000 sec  
 TD0 1  
 SFO1 400.1324708 MHz  
 NUC1 1H  
 P0 2.51 usec  
 P1 7.53 usec  
 PLW1 22.80999947 W

F2 - Processing parameters  
 SI 65536  
 SF 400.1300104 MHz  
 WDW EM  
 SSB 0  
 LB 0.30 Hz  
 GB 0  
 PC 1.00

PEP27-4F

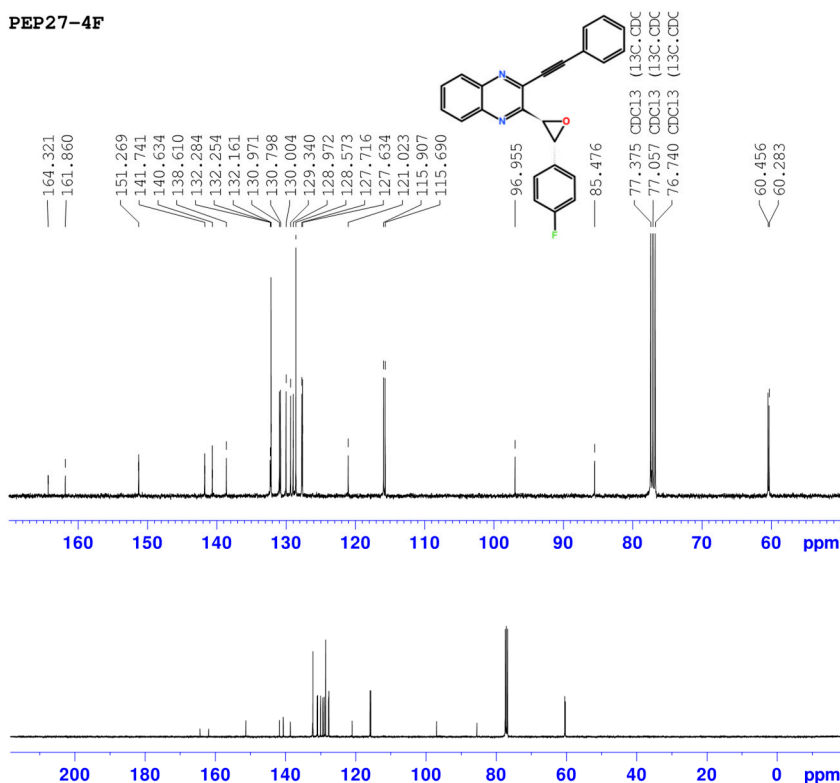

Current Data Parameters  
 NAME PEP27\_13C  
 EXPNO 11  
 PROCNO 1

F2 - Acquisition Parameters  
 Date\_ 20200622  
 Time 12.10 h  
 INSTRUM Avance NEO 400  
 PROBHD Z163739\_0130 (zgpg30)  
 PULPROG zgpg30  
 TD 65536  
 SOLVENT CDCl3  
 NS 350  
 DS 4  
 SWH 23809.523 Hz  
 FIDRES 0.726609 Hz  
 AQ 1.3762560 sec  
 RG 101  
 DW 21.000 usec  
 DE 6.50 usec  
 TE 298.0 K  
 D1 2.00000000 sec  
 D11 0.03000000 sec  
 TD0 1  
 SFO1 100.6228298 MHz  
 NUC1 13C  
 P0 2.67 usec  
 P1 8.00 usec  
 PLW1 95.56300354 W  
 SFO2 400.1316005 MHz  
 NUC2 1H  
 CPGPRG2 waltz65  
 PCPD2 90.00 usec  
 PLW2 22.80999947 W  
 PLW12 0.15967000 W  
 PLW13 0.08031400 W

F2 - Processing parameters  
 SI 32768  
 SF 100.6127685 MHz  
 WDW EM  
 SSB 0  
 LB 1.00 Hz  
 GB 0  
 PC 1.40

Data File C:\Chem32\...rganique\prestation\_chimie\_organique 2022-05-31\OnlineEdited--025.D  
Sample Name: PEP27

```
=====
Acq. Operator   : SYSTEM                      Seq. Line :   25
Acq. Instrument : LC1290                     Location  :   P1-C6
Injection Date  : 31/5/2022 7:31:17 PM        Inj       :    1
                                           Inj Volume: 1.000 µl
Method         : C:\Chem32\1\Data\prestation_chimie_organique\prestation_chimie_organique
                2022-05-31\prestation_chimie_org.M (Sequence Method)
Last changed    : 31/5/2022 1:07:56 PM by SYSTEM
Additional Info : Peak(s) manually integrated
=====
```

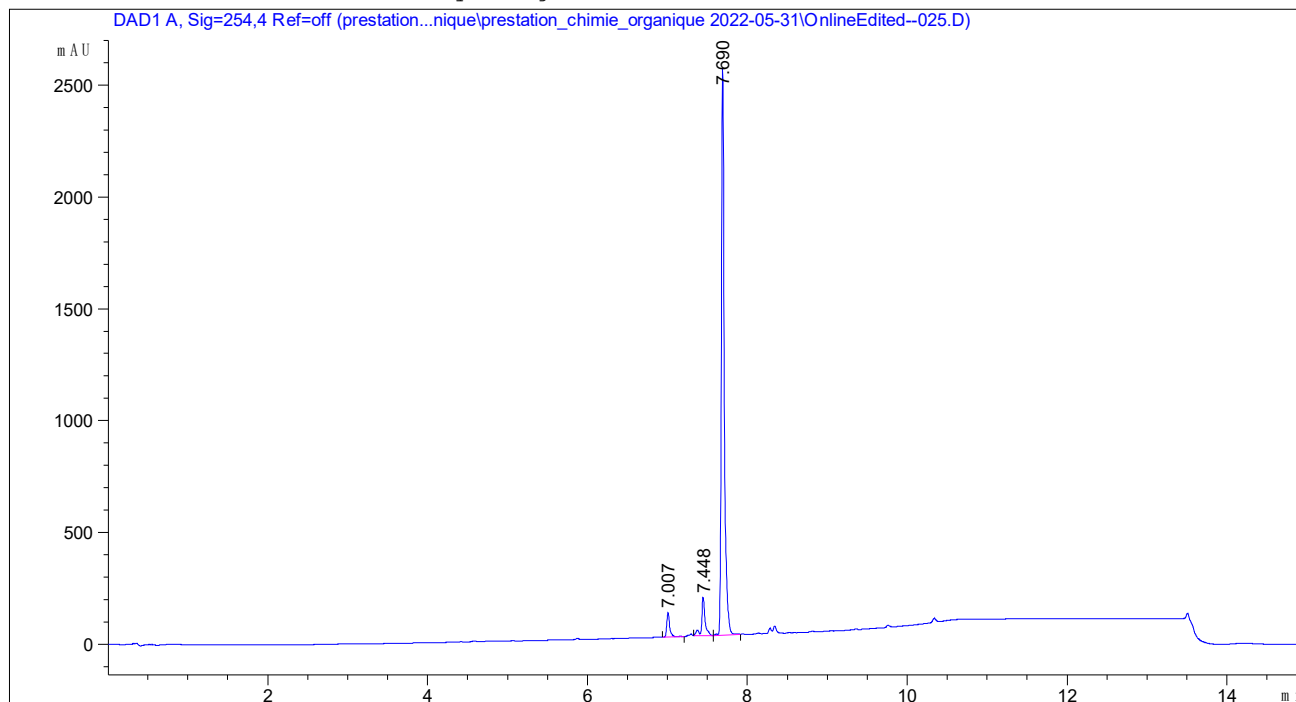

```
=====
                        Area Percent Report
=====
```

```
Sorted By      :      Signal
Multiplier     :      1.0000
Dilution       :      1.0000
Use Multiplier & Dilution Factor with ISTDs
```

Signal 1: DAD1 A, Sig=254,4 Ref=off

| Peak # | RetTime [min] | Type | Width [min] | Area [mAU*s] | Height [mAU] | Area %  |
|--------|---------------|------|-------------|--------------|--------------|---------|
| 1      | 7.007         | BV R | 0.0396      | 292.25009    | 108.85187    | 3.9192  |
| 2      | 7.448         | VB R | 0.0396      | 520.73712    | 170.16032    | 6.9834  |
| 3      | 7.690         | VV R | 0.0395      | 6643.84668   | 2529.45068   | 89.0974 |

Totals : 7456.83389 2808.46288

```
=====
*** End of Report ***
```



## Compound 19b

PEP28-4F

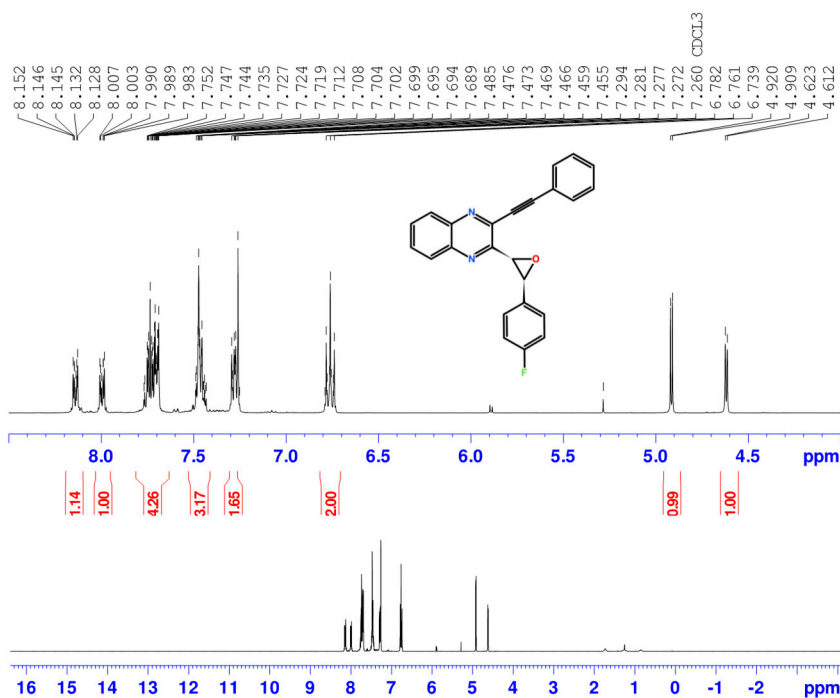

Current Data Parameters  
NAME PEP28\_1H  
EXPNO 10  
PROCNO 1

F2 - Acquisition Parameters  
Date\_ 20200619  
Time 15.28 h  
INSTRUM Avance NEO 400  
PROBHD Z163739\_0130 (zg30)  
PULPROG zg30  
TD 65536  
SOLVENT CDCl<sub>3</sub>  
NS 16  
DS 2  
SWH 8196.722 Hz  
FIDRES 0.250144 Hz  
AQ 3.9976959 sec  
RG 101  
DW 61.000 usec  
DE 13.97 usec  
TE 298.0 K  
D1 1.00000000 sec  
TD0 1  
SFO1 400.1324708 MHz  
NUC1 1H  
P0 2.51 usec  
P1 7.53 usec  
PLW1 22.80999947 W

F2 - Processing parameters  
SI 65536  
SF 400.1300402 MHz  
WDW EM  
SSB 0  
LB 0.30 Hz  
GB 0  
PC 1.00

PEP28-4F

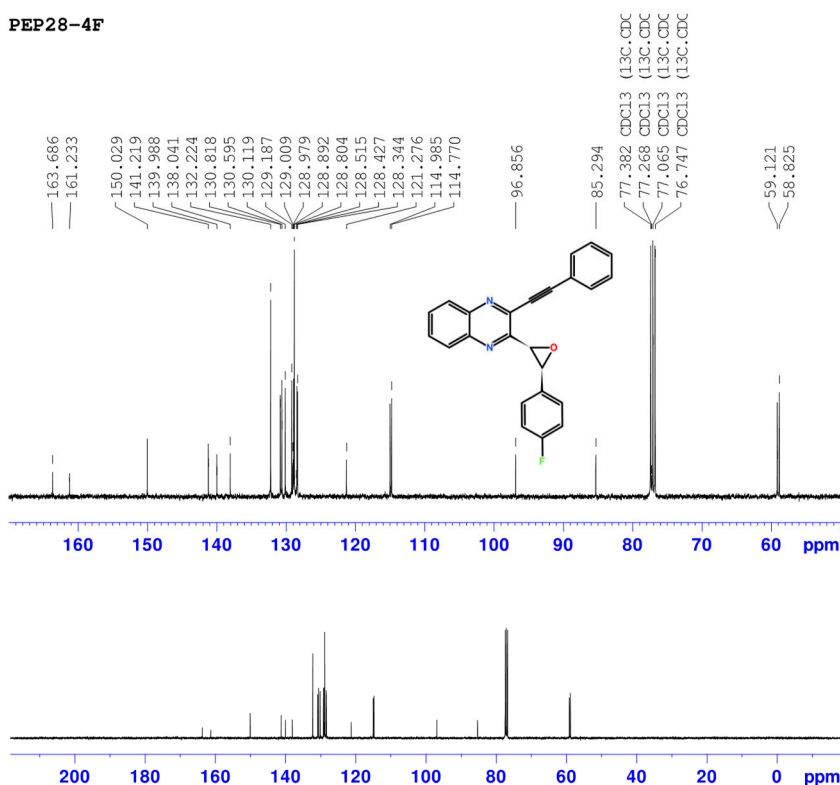

Current Data Parameters  
NAME PEP28\_13C  
EXPNO 11  
PROCNO 1

F2 - Acquisition Parameters  
Date\_ 20200622  
Time 15.56 h  
INSTRUM Avance NEO 400  
PROBHD Z163739\_0130 (zgpg30)  
PULPROG zgpg30  
TD 65536  
SOLVENT CDCl<sub>3</sub>  
NS 176  
DS 4  
SWH 23809.523 Hz  
FIDRES 0.726609 Hz  
AQ 1.3762560 sec  
RG 101  
DW 21.000 usec  
DE 6.50 usec  
TE 298.0 K  
D1 2.00000000 sec  
D11 0.03000000 sec  
TD0 1  
SFO1 100.6228298 MHz  
NUC1 13C  
P0 2.67 usec  
P1 8.00 usec  
PLW1 95.56300354 W  
SFO2 400.1316005 MHz  
NUC2 1H  
CPOPRG(2) waltz65  
PCPD2 90.00 usec  
PLW2 22.80999947 W  
PLW12 0.15967000 W  
PLW13 0.08031400 W

F2 - Processing parameters  
SI 32768  
SF 100.6127685 MHz  
WDW EM  
SSB 0  
LB 1.00 Hz  
GB 0  
PC 1.40

Data File C:\Chem32\...\rganique\prestation\_chimie\_organique 2022-05-31\OnlineEdited--026.D  
Sample Name: PEP28

```
=====
Acq. Operator   : SYSTEM                      Seq. Line :   26
Acq. Instrument : LC1290                     Location  :   P1-C7
Injection Date  : 31/5/2022 7:47:03 PM        Inj       :    1
                                           Inj Volume: 1.000 µl
Method         : C:\Chem32\1\Data\prestation_chimie_organique\prestation_chimie_organique
                2022-05-31\prestation_chimie_org.M (Sequence Method)
Last changed    : 31/5/2022 1:07:56 PM by SYSTEM
Additional Info : Peak(s) manually integrated
=====
```

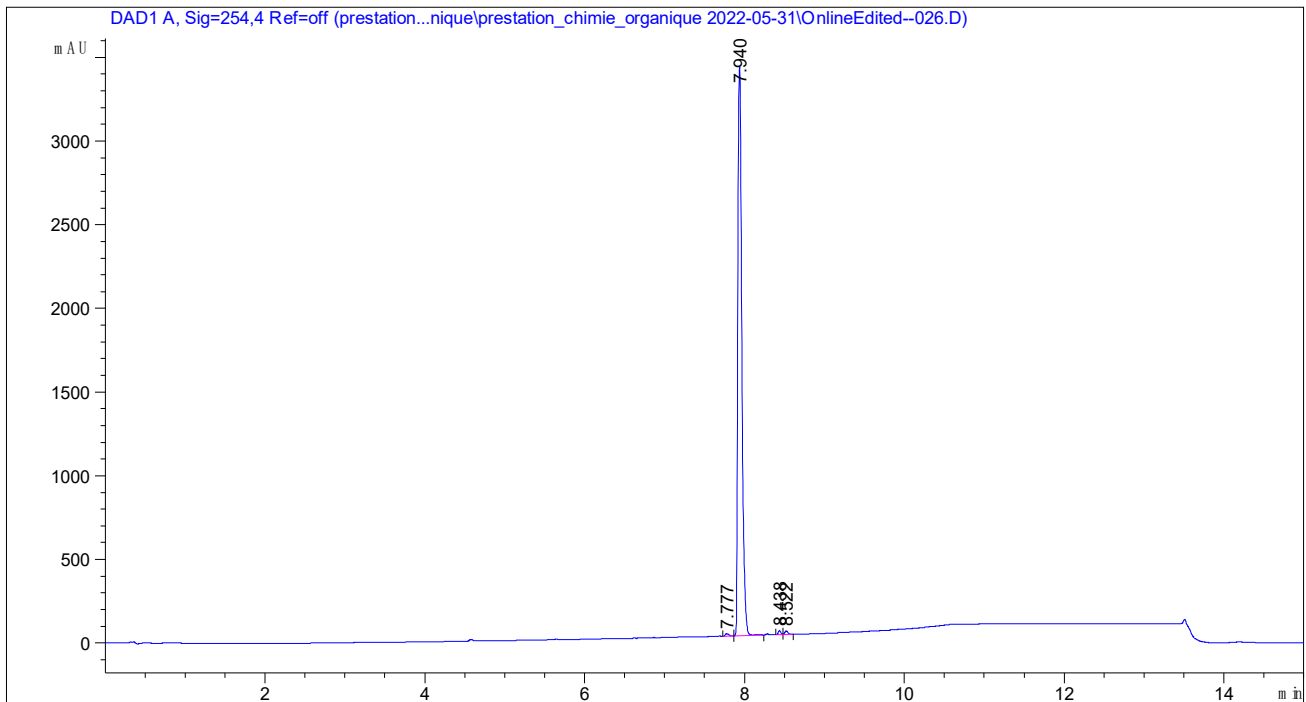

```
=====
                          Area Percent Report
=====
```

```
Sorted By           :      Signal
Multiplier           :      1.0000
Dilution             :      1.0000
Use Multiplier & Dilution Factor with ISTDs
```

Signal 1: DAD1 A, Sig=254,4 Ref=off

| Peak # | RetTime [min] | Type | Width [min] | Area [mAU*s] | Height [mAU] | Area %  |
|--------|---------------|------|-------------|--------------|--------------|---------|
| 1      | 7.777         | BB   | 0.0422      | 45.23986     | 15.91781     | 0.3853  |
| 2      | 7.940         | BV R | 0.0537      | 1.15784e4    | 3399.18823   | 98.6096 |
| 3      | 8.438         | BV   | 0.0373      | 59.40652     | 24.52583     | 0.5059  |
| 4      | 8.522         | VB   | 0.0395      | 58.61246     | 21.73516     | 0.4992  |

Totals :                    1.17417e4 3461.36704

## Compound 20a

PEP35-3F

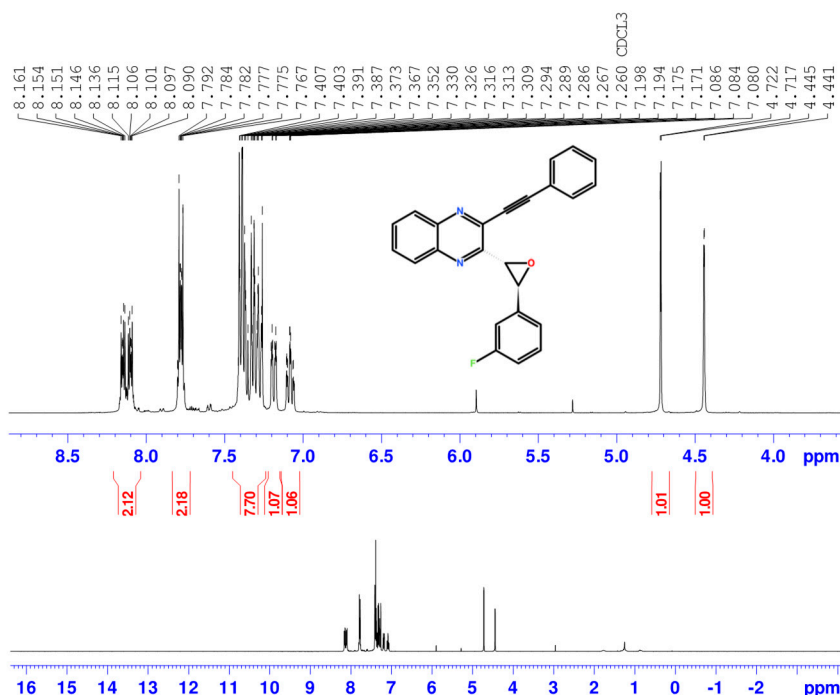

Current Data Parameters  
 NAME PEP35\_1H  
 EXPNO 10  
 PROCNO 1

F2 - Acquisition Parameters  
 Date\_ 20200619  
 Time 15.47 h  
 INSTRUM Avance NEO 400  
 PROBHD Z163739\_0130 ( )  
 PULPROG zg30  
 TD 65536  
 SOLVENT CDCl3  
 NS 16  
 DS 2  
 SWH 8196.722 Hz  
 FIDRES 0.250144 Hz  
 AQ 3.9976959 sec  
 RG 85.6123  
 DW 61.000 usec  
 DE 13.97 usec  
 TE 298.0 K  
 D1 1.00000000 sec  
 TD0 1  
 SFO1 400.1324708 MHz  
 NUC1 1H  
 P0 2.51 usec  
 P1 7.53 usec  
 PLW1 22.80999947 W

F2 - Processing parameters  
 SI 65536  
 SF 400.1300105 MHz  
 WDW EM  
 SSB 0  
 LB 0.30 Hz  
 GB 0  
 PC 1.00

PEP35-3F

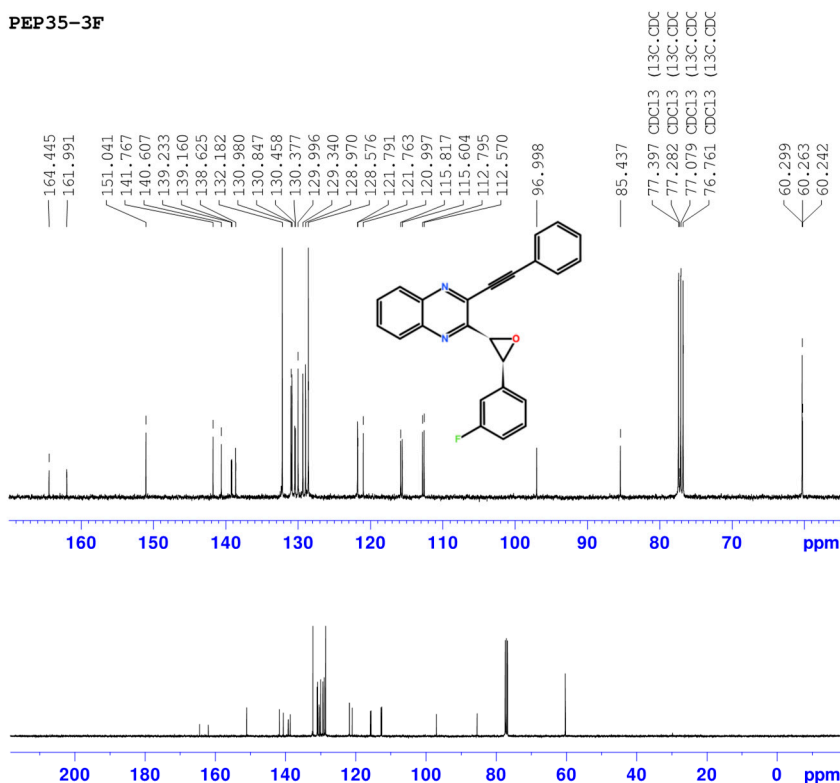

Current Data Parameters  
 NAME PEP35\_13C  
 EXPNO 11  
 PROCNO 1

F2 - Acquisition Parameters  
 Date\_ 20200622  
 Time 15.07 h  
 INSTRUM Avance NEO 400  
 PROBHD Z163739\_0130 ( )  
 PULPROG zgpg30  
 TD 65536  
 SOLVENT CDCl3  
 NS 210  
 DS 4  
 SWH 23809.523 Hz  
 FIDRES 0.726609 Hz  
 AQ 1.3762560 sec  
 RG 101  
 DW 21.000 usec  
 DE 6.50 usec  
 TE 298.0 K  
 D1 2.00000000 sec  
 D11 0.03000000 sec  
 TD0 1  
 SFO1 100.628298 MHz  
 NUC1 13C  
 P0 2.67 usec  
 P1 8.00 usec  
 PLW1 95.56300354 W  
 SFO2 400.1316005 MHz  
 NUC2 1H  
 CPGPRG2 waltz65  
 PCPD2 90.00 usec  
 PLW2 22.80999947 W  
 PLW12 0.15967000 W  
 PLW13 0.08031400 W

F2 - Processing parameters  
 SI 32768  
 SF 100.6127685 MHz  
 WDW EM  
 SSB 0  
 LB 1.00 Hz  
 GB 0  
 PC 1.40

## Compound 20b

PEP34-3F

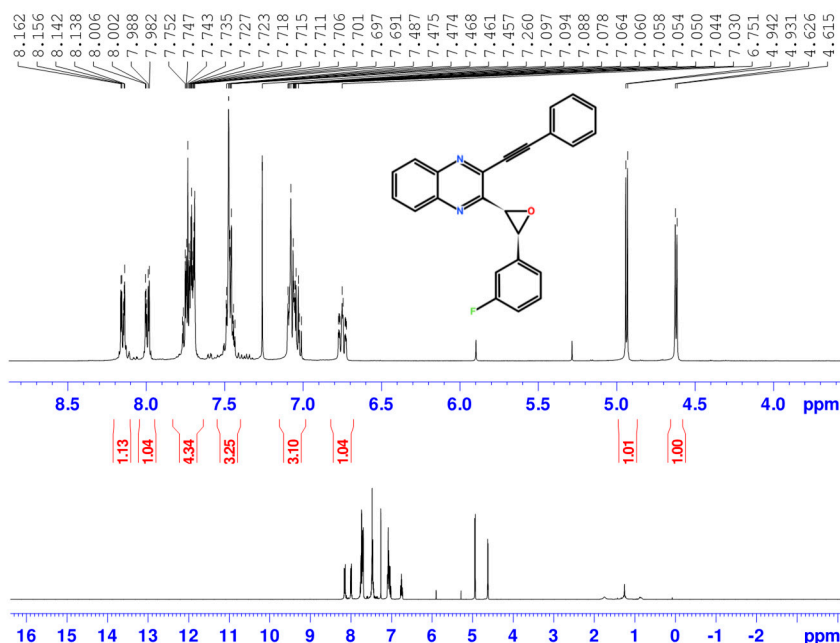

Current Data Parameters  
 NAME PEP34\_1H  
 EXPNO 10  
 PROCNO 1

F2 - Acquisition Parameters  
 Date\_ 20200619  
 Time 15.41 h  
 INSTRUM Avance NEO 400  
 PROBHD Z163739\_0130 (zpg30)  
 PULPROG zg30  
 TD 65536  
 SOLVENT CDCl3  
 NS 16  
 DS 2  
 SWH 8196.722 Hz  
 FIDRES 0.250144 Hz  
 AQ 3.9976959 sec  
 RG 100.9  
 DW 61.000 usec  
 DE 13.97 usec  
 TE 298.0 K  
 D1 1.00000000 sec  
 TD0 1  
 SFO1 400.1324708 MHz  
 NUC1 1H  
 P0 2.51 usec  
 P1 7.53 usec  
 PLW1 22.80999947 W

F2 - Processing parameters  
 SI 65536  
 SF 400.1300104 MHz  
 WDW EM  
 SSB 0  
 LB 0.30 Hz  
 GB 0  
 PC 1.00

PEP34-3F

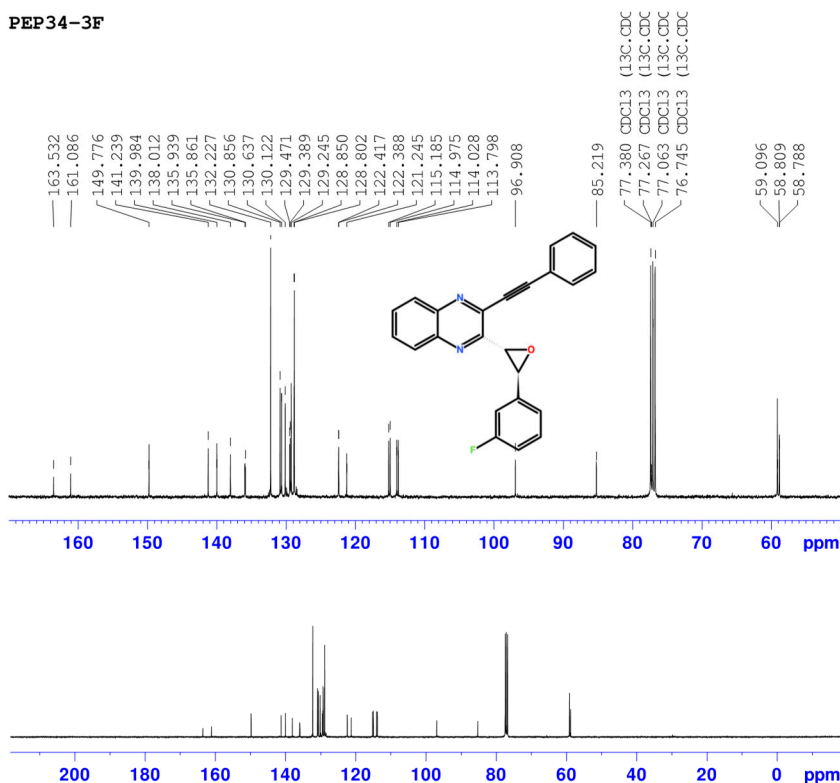

Current Data Parameters  
 NAME PEP34\_13C  
 EXPNO 11  
 PROCNO 1

F2 - Acquisition Parameters  
 Date\_ 20200622  
 Time 13.26 h  
 INSTRUM Avance NEO 400  
 PROBHD Z163739\_0130 (zpg30)  
 PULPROG zgpg30  
 TD 65536  
 SOLVENT CDCl3  
 NS 602  
 DS 4  
 SWH 23809.523 Hz  
 FIDRES 0.726609 Hz  
 AQ 1.3762560 sec  
 RG 101  
 DW 21.000 usec  
 DE 6.50 usec  
 TE 298.0 K  
 D1 2.00000000 sec  
 D11 0.03000000 sec  
 TD0 1  
 SFO1 100.628298 MHz  
 NUC1 13C  
 P0 2.67 usec  
 P1 8.00 usec  
 PLW1 95.56300354 W  
 SFO2 400.1316005 MHz  
 NUC2 1H  
 CPGPRG2 waltz65  
 PCPD2 90.00 usec  
 PLW2 22.80999947 W  
 PLW12 0.15967000 W  
 PLW13 0.08031400 W

F2 - Processing parameters  
 SI 32768  
 SF 100.6127685 MHz  
 WDW EM  
 SSB 0  
 LB 1.00 Hz  
 GB 0  
 PC 1.40

Data File C:\Chem32\...rganique\prestation\_chimie\_organique 2022-05-31\OnlineEdited--031.D  
Sample Name: PEP34

```
=====
Acq. Operator   : SYSTEM                      Seq. Line :   31
Acq. Instrument : LC1290                     Location  :   P1-D3
Injection Date  : 31/5/2022 9:06:01 PM        Inj       :    1
                                           Inj Volume: 1.000 µl
Method         : C:\Chem32\1\Data\prestation_chimie_organique\prestation_chimie_organique
                2022-05-31\prestation_chimie_org.M (Sequence Method)
Last changed    : 31/5/2022 1:07:56 PM by SYSTEM
Additional Info : Peak(s) manually integrated
=====
```

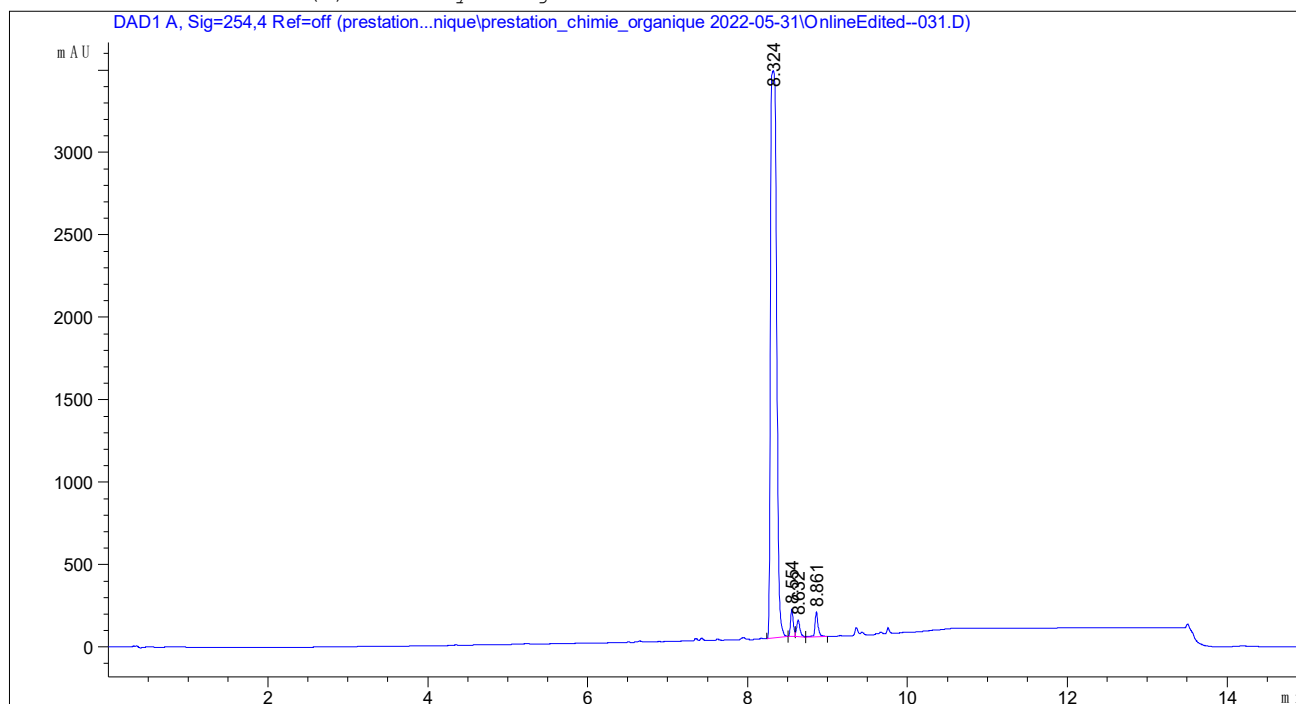

# Area Percent Report

```
=====
Sorted By      :      Signal
Multiplier     :      1.0000
Dilution       :      1.0000
Use Multiplier & Dilution Factor with ISTDs
=====
```

Signal 1: DAD1 A, Sig=254,4 Ref=off

| Peak # | RetTime [min] | Type | Width [min] | Area [mAU*s] | Height [mAU] | Area %  |
|--------|---------------|------|-------------|--------------|--------------|---------|
| 1      | 8.324         | BB   | 0.0827      | 1.78862e4    | 3439.96216   | 94.2043 |
| 2      | 8.554         | BV   | 0.0363      | 394.31558    | 168.49573    | 2.0768  |
| 3      | 8.632         | VB   | 0.0444      | 300.44666    | 101.93674    | 1.5824  |
| 4      | 8.861         | VB R | 0.0397      | 405.65085    | 151.90590    | 2.1365  |

Totals : 1.89866e4 3862.30053

## Compound 21a

2022-03-10

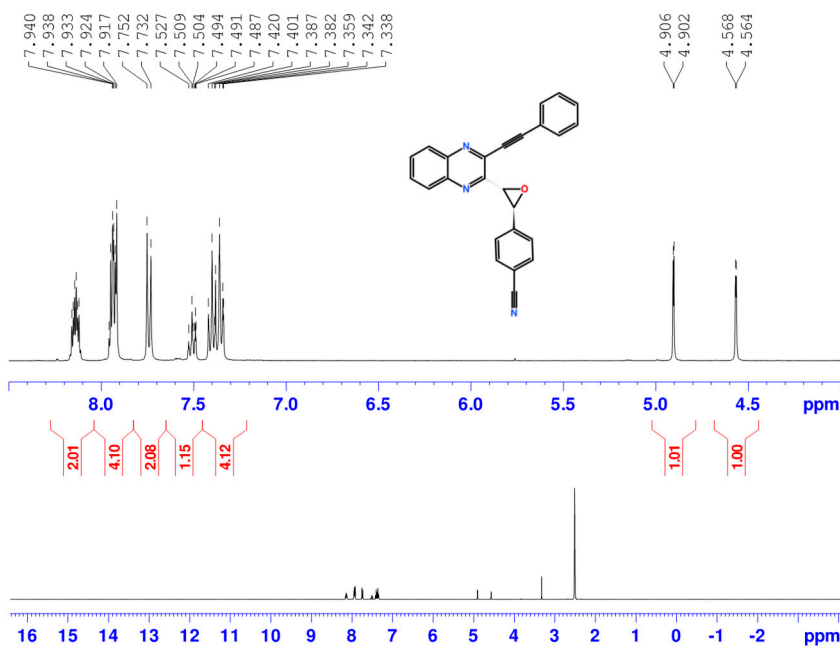

Current Data Parameters  
 NAME PEP48\_1H  
 EXPNO 30  
 PROCNO 1

F2 - Acquisition Parameters  
 Date\_ 20220310  
 Time 17.41 h  
 INSTRUM Avance NEO 400  
 PROBHD Z163739\_0130 (zg30)  
 PULPROG zg30  
 TD 65536  
 SOLVENT DMSO  
 NS 16  
 DS 2  
 SWH 8196.722 Hz  
 FIDRES 0.250144 Hz  
 AQ 3.9976959 sec  
 RG 101  
 DW 61.000 usec  
 DE 13.97 usec  
 TE 298.0 K  
 D1 1.00000000 sec  
 TD0 1  
 SFO1 400.1324708 MHz  
 NUC1 1H  
 P0 2.51 usec  
 P1 7.53 usec  
 PLW1 22.80999947 W

F2 - Processing parameters  
 SI 65536  
 SF 400.1300000 MHz  
 WDW EM  
 SSB 0  
 LB 0.30 Hz  
 GB 0  
 PC 1.00

2022-03-10

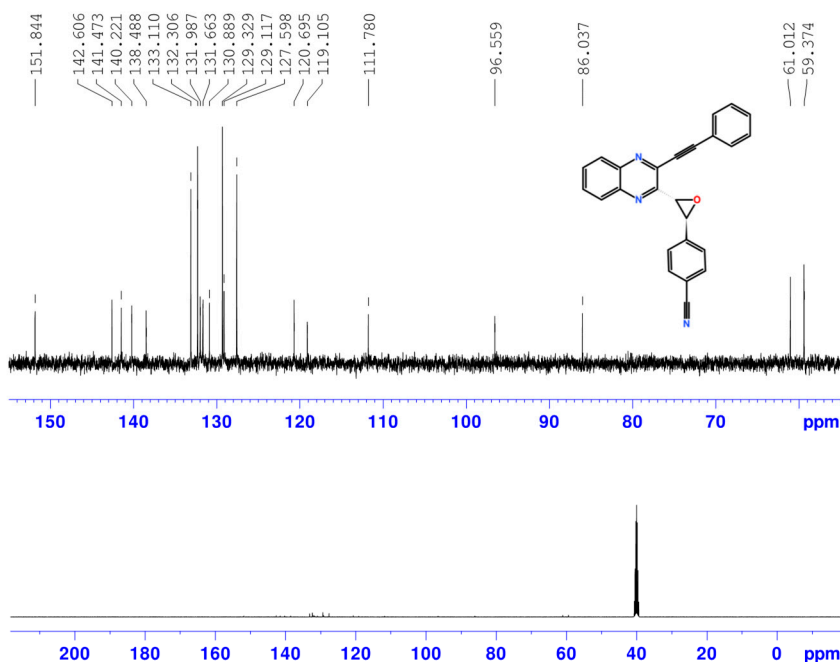

Current Data Parameters  
 NAME PEP48\_13C  
 EXPNO 10  
 PROCNO 1

F2 - Acquisition Parameters  
 Date\_ 20220311  
 Time 1.14 h  
 INSTRUM Avance NEO 400  
 PROBHD Z163739\_0130 (zgpg30)  
 PULPROG zgpg30  
 TD 65536  
 SOLVENT DMSO  
 NS 2048  
 DS 4  
 SWH 23809.523 Hz  
 FIDRES 0.726609 Hz  
 AQ 1.3762560 sec  
 RG 101  
 DW 21.000 usec  
 DE 6.50 usec  
 TE 298.0 K  
 D1 2.00000000 sec  
 D11 0.03000000 sec  
 TD0 1  
 SFO1 100.6228298 MHz  
 NUC1 13C  
 P0 2.67 usec  
 P1 8.00 usec  
 PLW1 95.56300354 W  
 SFO2 400.1316005 MHz  
 NUC2 1H  
 CPGPRG2 waltz16  
 PCPD2 90.00 usec  
 PLW2 22.80999947 W  
 PLW12 0.15967000 W  
 PLW13 0.08031400 W

F2 - Processing parameters  
 SI 32768  
 SF 100.6127685 MHz  
 WDW EM  
 SSB 0  
 LB 1.00 Hz  
 GB 0  
 PC 1.40

Data File C:\Chem32\...rganique\prestation\_chimie\_organique 2022-05-31\OnlineEdited--039.D  
Sample Name: PEP48

```
=====
Acq. Operator   : SYSTEM                      Seq. Line :   39
Acq. Instrument : LC1290                     Location  :   P1-E2
Injection Date  : 31/5/2022 11:12:11 PM      Inj       :    1
                                           Inj Volume: 1.000 µl
Method          : C:\Chem32\1\Data\prestation_chimie_organique\prestation_chimie_organique
                  2022-05-31\prestation_chimie_org.M (Sequence Method)
Last changed    : 31/5/2022 1:07:56 PM by SYSTEM
Additional Info  : Peak(s) manually integrated
=====
```

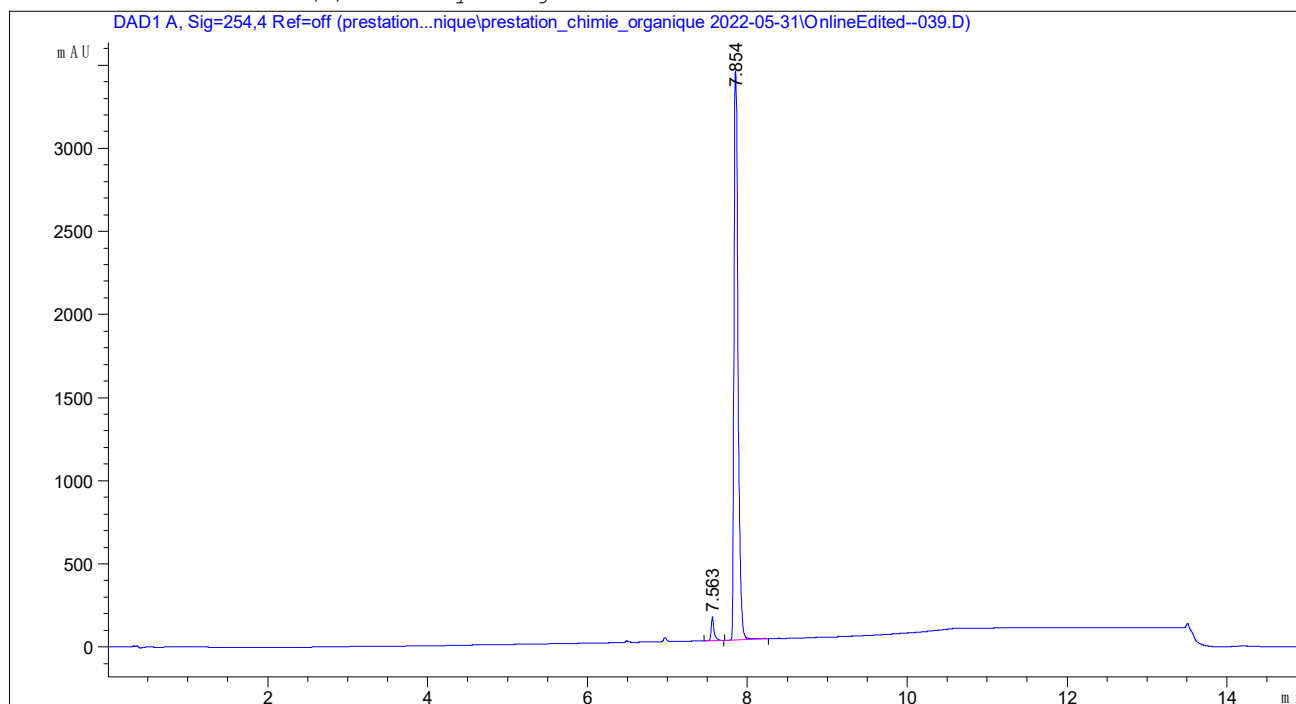

```
=====
                          Area Percent Report
=====
```

```
Sorted By      :      Signal
Multiplier     :      1.0000
Dilution       :      1.0000
Use Multiplier & Dilution Factor with ISTDs
```

Signal 1: DAD1 A, Sig=254,4 Ref=off

| Peak # | RetTime [min] | Type | Width [min] | Area [mAU*s] | Height [mAU] | Area %  |
|--------|---------------|------|-------------|--------------|--------------|---------|
| 1      | 7.563         | BB   | 0.0378      | 365.28397    | 143.02545    | 2.8536  |
| 2      | 7.854         | BV R | 0.0572      | 1.24355e4    | 3423.59668   | 97.1464 |

Totals : 1.28007e4 3566.62213

```
=====
*** End of Report ***
```

## Compound 21b

2022-03-10

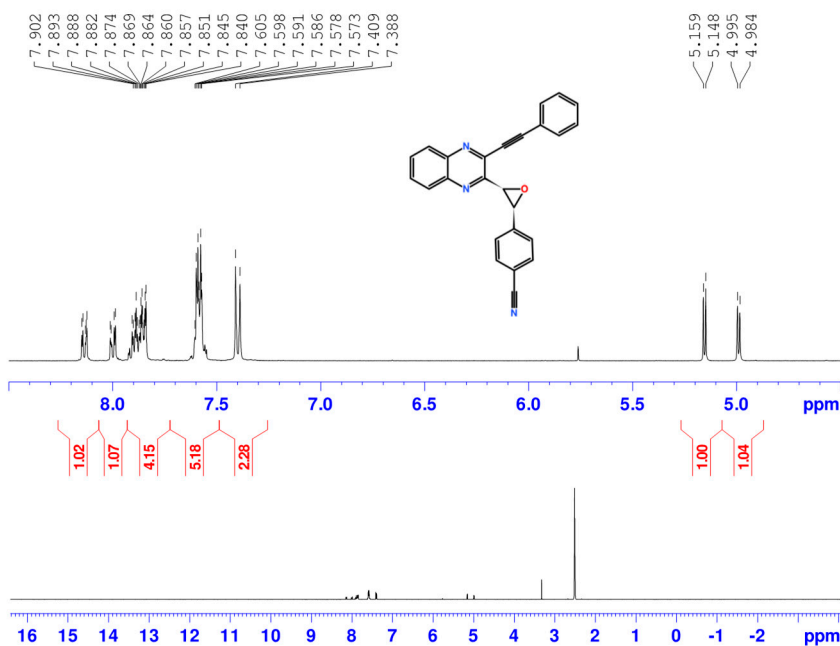

Current Data Parameters  
NAME PEP49\_1H  
EXPNO 30  
PROCNO 1

F2 - Acquisition Parameters  
Date\_ 20220310  
Time 17.47 h  
INSTRUM Avance NEO 400  
PROBHD Z163739\_0130 (zg30)  
PULPROG zg30  
TD 65536  
SOLVENT DMSO  
NS 16  
DS 2  
SWH 8196.722 Hz  
FIDRES 0.250144 Hz  
AQ 3.9976959 sec  
RG 101  
DW 61.000 usec  
DE 13.97 usec  
TE 298.0 K  
D1 1.00000000 sec  
TD0 1  
SFO1 400.1324708 MHz  
NUC1 1H  
P0 2.51 usec  
P1 7.53 usec  
PLW1 22.80999947 W

F2 - Processing parameters  
SI 65536  
SF 400.1300000 MHz  
WDW EM  
SSB 0  
LB 0.30 Hz  
GB 0  
PC 1.00

2022-03-10

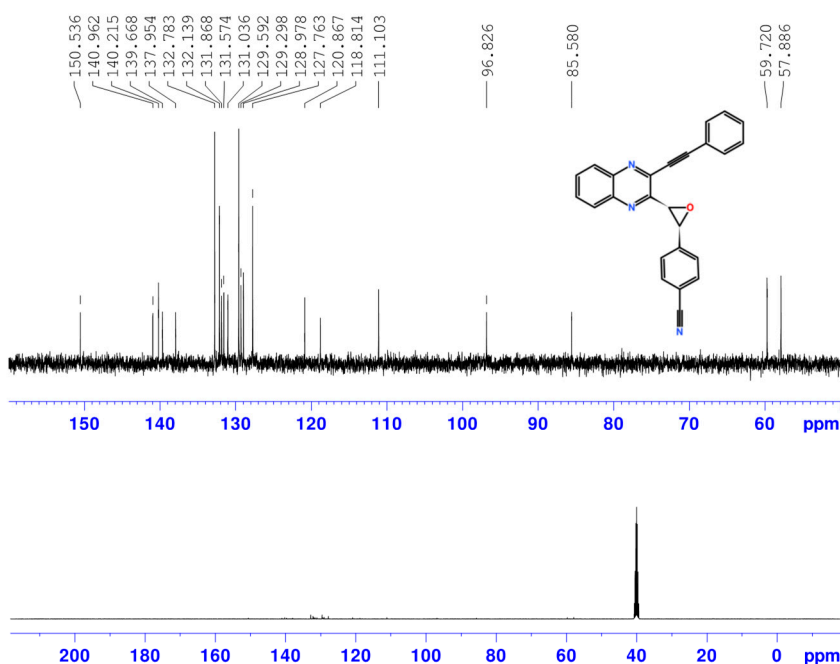

Current Data Parameters  
NAME PEP49\_13C  
EXPNO 10  
PROCNO 1

F2 - Acquisition Parameters  
Date\_ 20220311  
Time 3.18 h  
INSTRUM Avance NEO 400  
PROBHD Z163739\_0130 (zgpg30)  
PULPROG zgpg30  
TD 65536  
SOLVENT DMSO  
NS 2048  
DS 4  
SWH 23809.523 Hz  
FIDRES 0.726609 Hz  
AQ 1.3762560 sec  
RG 101  
DW 21.000 usec  
DE 6.50 usec  
TE 298.0 K  
D1 2.00000000 sec  
D11 0.03000000 sec  
TD0 1  
SFO1 100.6228298 MHz  
NUC1 13C  
P0 2.67 usec  
P1 8.00 usec  
PLW1 95.56300354 W  
SFO2 400.1316005 MHz  
NUC2 1H  
CPOPRG2 waltz16  
PCPD2 90.00 usec  
PLW2 22.80999947 W  
PLW12 0.15967000 W  
PLW13 0.08031400 W

F2 - Processing parameters  
SI 32768  
SF 100.6127685 MHz  
WDW EM  
SSB 0  
LB 1.00 Hz  
GB 0  
PC 1.40



## Compound 22a

2022-03-07

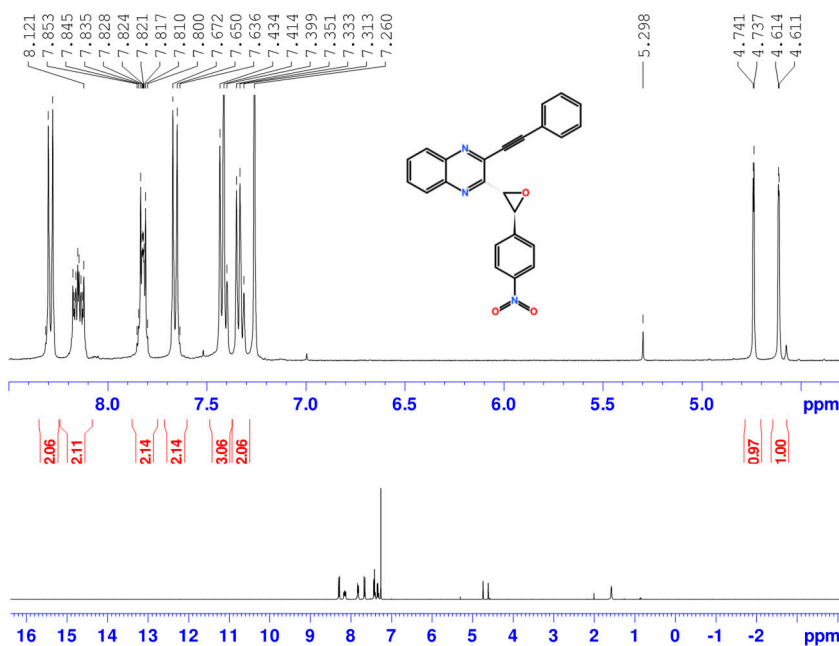

Current Data Parameters  
NAME PEP44\_1H  
EXPNO 10  
PROCNO 1

F2 - Acquisition Parameters  
Date\_ 20220307  
Time 20.08 h  
INSTRUM Avance NEO 400  
PROBHD Z163739\_0130 (zg30)  
PULPROG zg30  
TD 65536  
SOLVENT CDCl3  
NS 16  
DS 2  
SWH 8196.722 Hz  
FIDRES 0.250144 Hz  
AQ 3.9976959 sec  
RG 101  
DW 61.000 usec  
DE 13.97 usec  
TE 298.0 K  
D1 1.00000000 sec  
TD0 1  
SFO1 400.1324708 MHz  
NUC1 1H  
P0 2.51 usec  
P1 7.53 usec  
PLW1 22.80999947 W

F2 - Processing Parameters  
SI 65536  
SF 400.1300104 MHz  
WDW EM  
SSB 0  
LB 0.30 Hz  
GB 0  
PC 1.00

2022-03-09

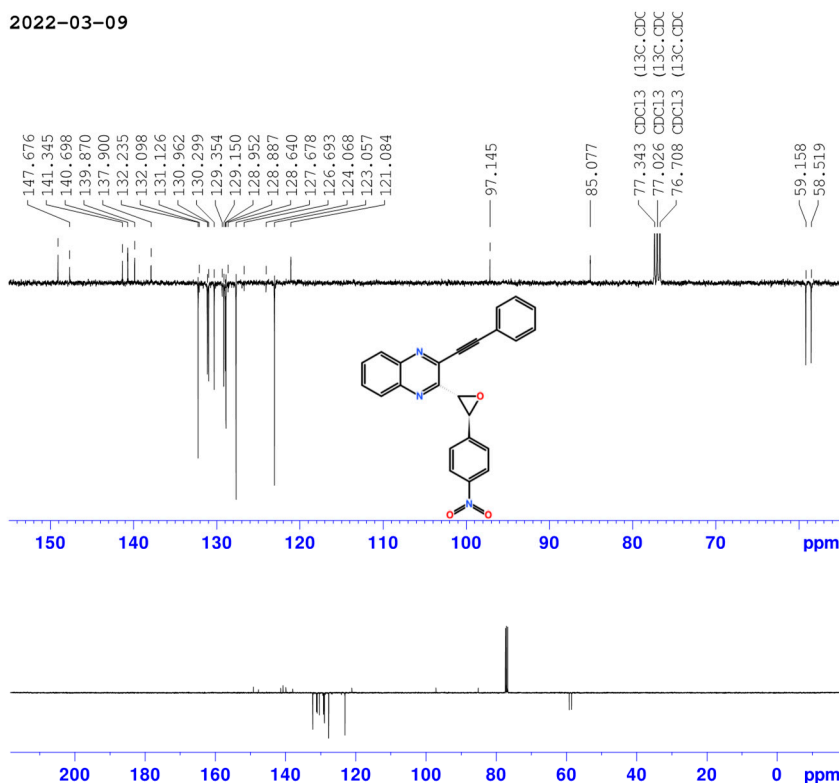

Current Data Parameters  
NAME PEP44\_13C  
EXPNO 10  
PROCNO 1

F2 - Acquisition Parameters  
Date\_ 20220309  
Time 23.22 h  
INSTRUM Avance NEO 400  
PROBHD Z163739\_0130 (zgpg30)  
PULPROG zgpg30  
TD 65536  
SOLVENT CDCl3  
NS 3048  
DS 4  
SWH 23809.323 Hz  
FIDRES 0.726609 Hz  
AQ 1.3762560 sec  
RG 101  
DW 21.000 usec  
DE 6.50 usec  
TE 298.0 K  
CNST2 145.0000000  
CNST11 1.0000000  
D1 2.00000000 sec  
D20 0.00689653 sec  
TD0 1  
SFO1 100.6282298 MHz  
NUC1 13C  
P1 8.00 usec  
P2 16.00 usec  
PLW1 95.56300354 W  
SFO2 400.1316005 MHz  
NUC2 1H  
CPDPRG2 waltz16  
PCPD2 90.00 usec  
PLW2 22.80999947 W  
PLW12 0.15967000 W

F2 - Processing Parameters  
SI 32768  
SF 100.6127685 MHz  
WDW EM  
SSB 0  
LB 1.00 Hz  
GB 0  
PC 1.40

Data File C:\Chem32\...rganique\prestation\_chimie\_organique 2022-05-31\OnlineEdited--035.D  
Sample Name: PEP44

```
=====
Acq. Operator   : SYSTEM                      Seq. Line :   35
Acq. Instrument : LC1290                     Location  :   P1-D7
Injection Date  : 31/5/2022 10:09:07 PM      Inj       :    1
                                           Inj Volume: 1.000 µl
Method          : C:\Chem32\1\Data\prestation_chimie_organique\prestation_chimie_organique
                  2022-05-31\prestation_chimie_org.M (Sequence Method)
Last changed    : 31/5/2022 1:07:56 PM by SYSTEM
Additional Info : Peak(s) manually integrated
=====
```

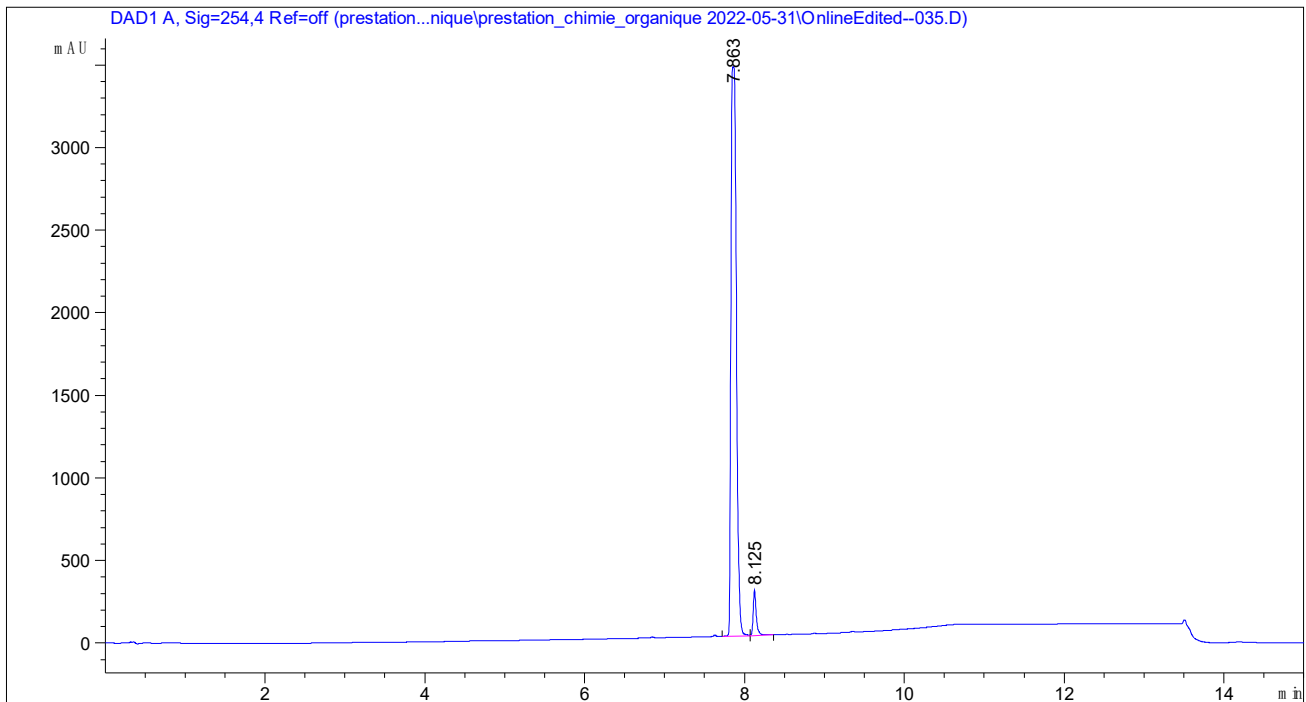

```
=====
                        Area Percent Report
=====
```

```
Sorted By      :      Signal
Multiplier     :      1.0000
Dilution       :      1.0000
Use Multiplier & Dilution Factor with ISTDs
```

Signal 1: DAD1 A, Sig=254,4 Ref=off

| Peak # | RetTime [min] | Type | Width [min] | Area [mAU*s] | Height [mAU] | Area %  |
|--------|---------------|------|-------------|--------------|--------------|---------|
| 1      | 7.863         | BV   | 0.0745      | 1.61083e4    | 3445.96948   | 95.7239 |
| 2      | 8.125         | VV R | 0.0385      | 719.57733    | 275.56274    | 4.2761  |

Totals : 1.68279e4 3721.53223

```
=====
*** End of Report ***
```

## Compound 22b

PEP45 1H CDC13 8.12.2020

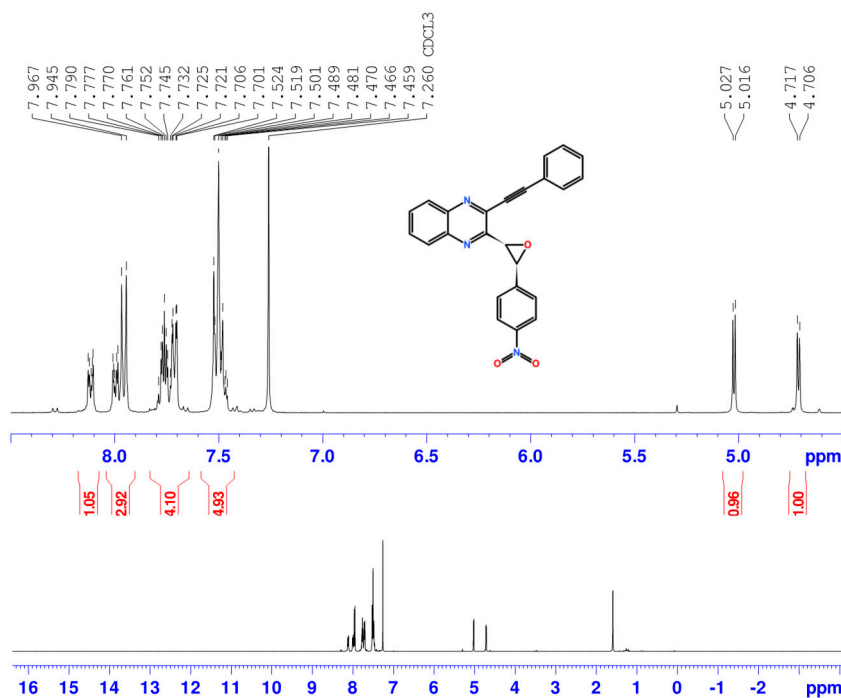

Current Data Parameters  
 NAME PEP45\_1H  
 EXPNO 10  
 PROCNO 1

F2 - Acquisition Parameters  
 Date\_ 20201208  
 Time 16.24 h  
 INSTRUM Avance NEO 400  
 PROBHD Z163739\_0130 ( )  
 PULPROG zg30  
 TD 65536  
 SOLVENT CDCl<sub>3</sub>  
 NS 6  
 DS 2  
 SWH 8196.722 Hz  
 FIDRES 0.250144 Hz  
 AQ 3.9976959 sec  
 RG 101  
 DW 61.000 usec  
 DE 13.97 usec  
 TE 298.0 K  
 D1 1.00000000 sec  
 TD0 1  
 SFO1 400.1324708 MHz  
 NUC1 1H  
 P0 2.51 usec  
 P1 7.53 usec  
 PLW1 22.80999947 W

F2 - Processing Parameters  
 SI 65536  
 SF 400.1300104 MHz  
 WDW EM  
 SSB 0  
 LB 0.30 Hz  
 GB 0  
 PC 1.00

2022-03-08

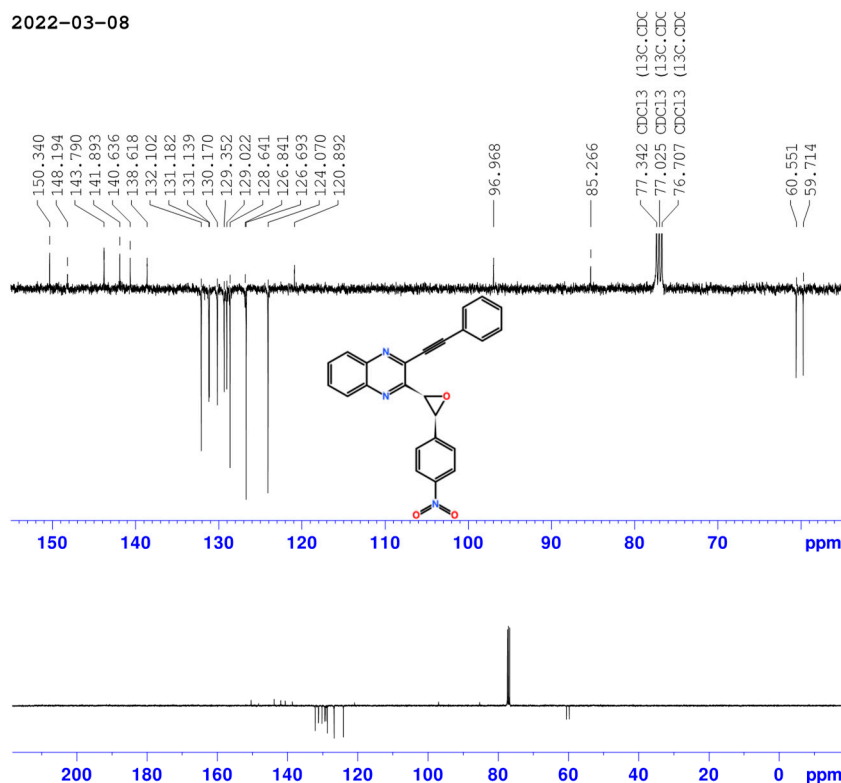

Current Data Parameters  
 NAME PEP45\_13  
 EXPNO 10  
 PROCNO 1

F2 - Acquisition Parameters  
 Date\_ 20220309  
 Time 4.43 h  
 INSTRUM Avance NEO 400  
 PROBHD Z163739\_0130 ( )  
 PULPROG zgpg30  
 TD 65536  
 SOLVENT CDCl<sub>3</sub>  
 NS 3048  
 DS 4  
 SWH 23809.323 Hz  
 FIDRES 0.726609 Hz  
 AQ 1.3762560 sec  
 RG 101  
 DW 21.000 usec  
 DE 6.50 usec  
 TE 298.0 K  
 CNST1 145.000000  
 CNST11 1.000000  
 D1 2.00000000 sec  
 D20 0.00689653 sec  
 TD0 1  
 SFO1 100.628298 MHz  
 NUC1 13C  
 P1 8.00 usec  
 P2 16.00 usec  
 PLW1 95.56303354 W  
 SFO2 400.1316005 MHz  
 NUC2 1H  
 CPDPRG2 waltz16  
 PCPD2 90.00 usec  
 PLW2 22.80999947 W  
 PLW12 0.15967000 W

F2 - Processing parameters  
 SI 32768  
 SF 100.6127685 MHz  
 WDW EM  
 SSB 0  
 LB 1.00 Hz  
 GB 0  
 PC 1.40

Data File C:\Chem32\...\rganique\prestation\_chimie\_organique 2022-05-31\OnlineEdited--036.D  
Sample Name: PEP45

```
=====
Acq. Operator   : SYSTEM                      Seq. Line :   36
Acq. Instrument : LC1290                     Location  :   P1-D8
Injection Date  : 31/5/2022 10:24:53 PM      Inj       :    1
                                           Inj Volume: 1.000 µl
Method         : C:\Chem32\1\Data\prestation_chimie_organique\prestation_chimie_organique
                2022-05-31\prestation_chimie_org.M (Sequence Method)
Last changed    : 31/5/2022 1:07:56 PM by SYSTEM
Additional Info : Peak(s) manually integrated
=====
```

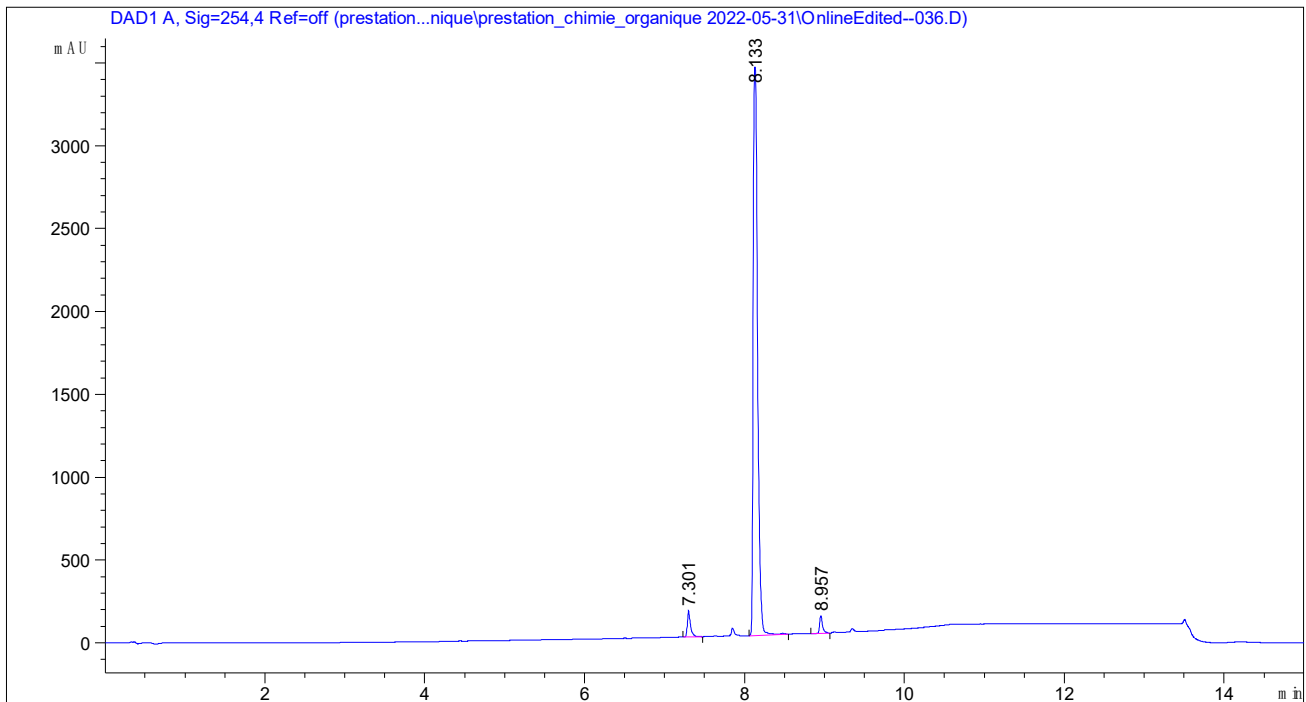

```
=====
                        Area Percent Report
=====
```

```
Sorted By           :      Signal
Multiplier           :      1.0000
Dilution             :      1.0000
Use Multiplier & Dilution Factor with ISTDs
```

Signal 1: DAD1 A, Sig=254,4 Ref=off

| Peak # | RetTime [min] | Type | Width [min] | Area [mAU*s] | Height [mAU] | Area %  |
|--------|---------------|------|-------------|--------------|--------------|---------|
| 1      | 7.301         | BV R | 0.0410      | 451.15408    | 159.28886    | 3.2742  |
| 2      | 8.133         | BV R | 0.0594      | 1.30718e4    | 3431.33911   | 94.8666 |
| 3      | 8.957         | BB   | 0.0364      | 256.19012    | 105.13464    | 1.8593  |

Totals : 1.37791e4 3695.76262

```
=====
*** End of Report ***
```

## Compound 23a

2022-06-03

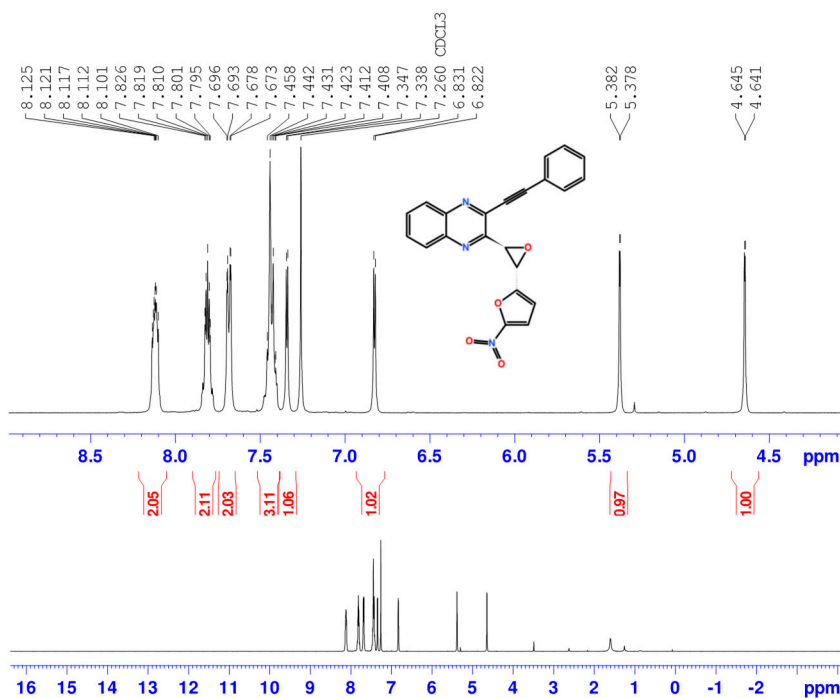

Current Data Parameters  
 NAME PEP42\_1H  
 EXPNO 93  
 PROCNO 1

F2 - Acquisition Parameters  
 Date\_ 20220603  
 Time 10.23 h  
 INSTRUM Avance NEO 400  
 PROBHD Z163739\_0130 ( )  
 PULPROG zg30  
 TD 65536  
 SOLVENT CDCl3  
 NS 16  
 DS 2  
 SWH 8196.722 Hz  
 FIDRES 0.250144 Hz  
 AQ 3.9976959 sec  
 RG 101  
 DW 61.000 usec  
 DE 13.97 usec  
 TE 298.0 K  
 D1 1.00000000 sec  
 TD0 1  
 SFO1 400.1324708 MHz  
 NUC1 1H  
 P0 2.51 usec  
 P1 7.53 usec  
 PLW1 22.80999947 W

F2 - Processing parameters  
 SI 65536  
 SF 400.1300108 MHz  
 WDW EM  
 SSB 0  
 LB 0.30 Hz  
 GB 0  
 PC 1.00

2022-03-15

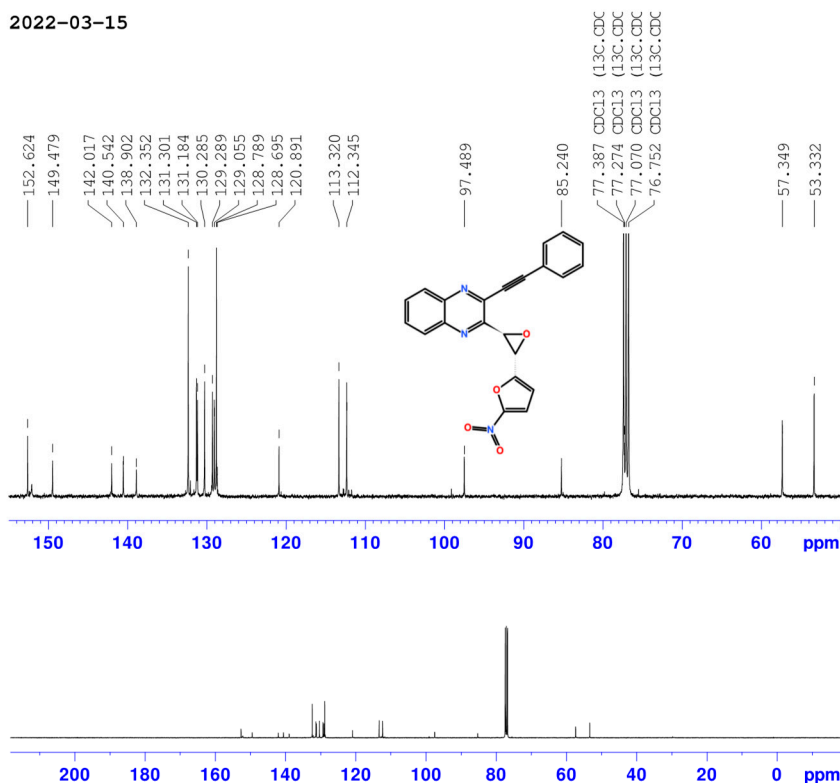

Current Data Parameters  
 NAME PEP42\_13C  
 EXPNO 30  
 PROCNO 1

F2 - Acquisition Parameters  
 Date\_ 20220315  
 Time 21.40 h  
 INSTRUM Avance NEO 400  
 PROBHD Z163739\_0130 ( )  
 PULPROG zgpg30  
 TD 65536  
 SOLVENT CDCl3  
 NS 2048  
 DS 4  
 SWH 23809.523 Hz  
 FIDRES 0.726609 Hz  
 AQ 1.3762560 sec  
 RG 101  
 DW 21.000 usec  
 DE 6.50 usec  
 TE 298.0 K  
 D1 2.00000000 sec  
 D11 0.03000000 sec  
 TD0 1  
 SFO1 100.6228298 MHz  
 NUC1 13C  
 P0 2.67 usec  
 P1 8.00 usec  
 PLW1 95.56300354 W  
 SFO2 400.1316005 MHz  
 NUC2 1H  
 CPGPRG2 waltz65  
 PCPD2 90.00 usec  
 PLW2 22.80999947 W  
 PLW12 0.15967000 W  
 PLW13 0.08031400 W

F2 - Processing parameters  
 SI 32768  
 SF 100.6127685 MHz  
 WDW EM  
 SSB 0  
 LB 1.00 Hz  
 GB 0  
 PC 1.40

## Compound 23

2022-03-06

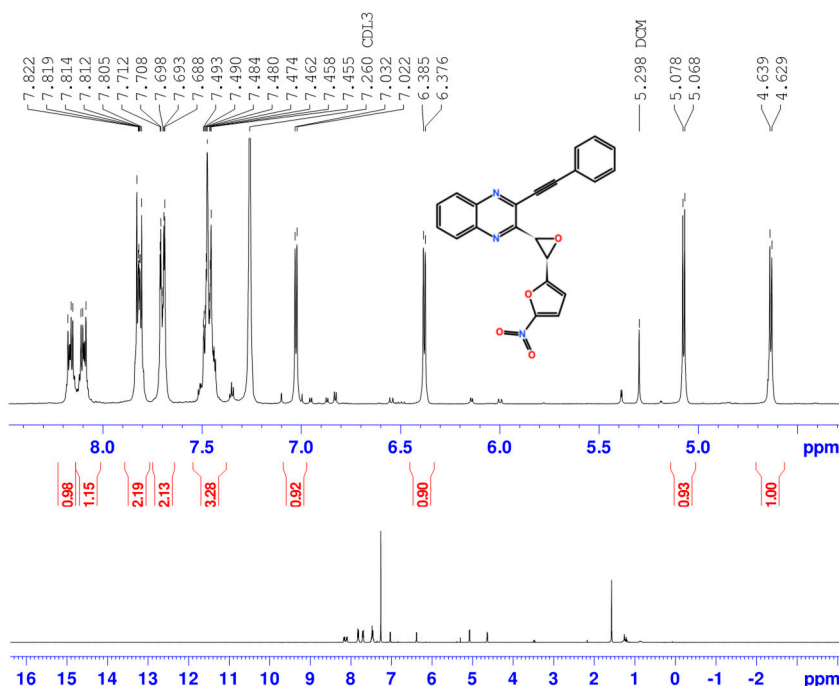

Current Data Parameters  
NAME PEP43\_1H  
EXPNO 30  
PROCNO 1

F2 - Acquisition Parameters  
Date\_ 20220603  
Time 16.23 h  
INSTRUM Avance NEO 400  
PROBHD Z163739\_0130 (zg30)  
PULPROG zg30  
TD 65536  
SOLVENT CDCl<sub>3</sub>  
NS 128  
DS 2  
SWH 8196.722 Hz  
FIDRES 0.250144 Hz  
AQ 3.9976959 sec  
RG 101  
DW 61.000 usec  
DE 13.97 usec  
TE 298.0 K  
D1 1.00000000 sec  
TD0 1  
SFO1 400.1324708 MHz  
NUC1 1H  
P0 2.51 usec  
P1 7.53 usec  
PLW1 22.80999947 W

F2 - Processing parameters  
SI 65536  
SF 400.1300107 MHz  
WDW EM  
SSB 0  
LB 0.30 Hz  
GB 0  
PC 1.00

2022-02-08

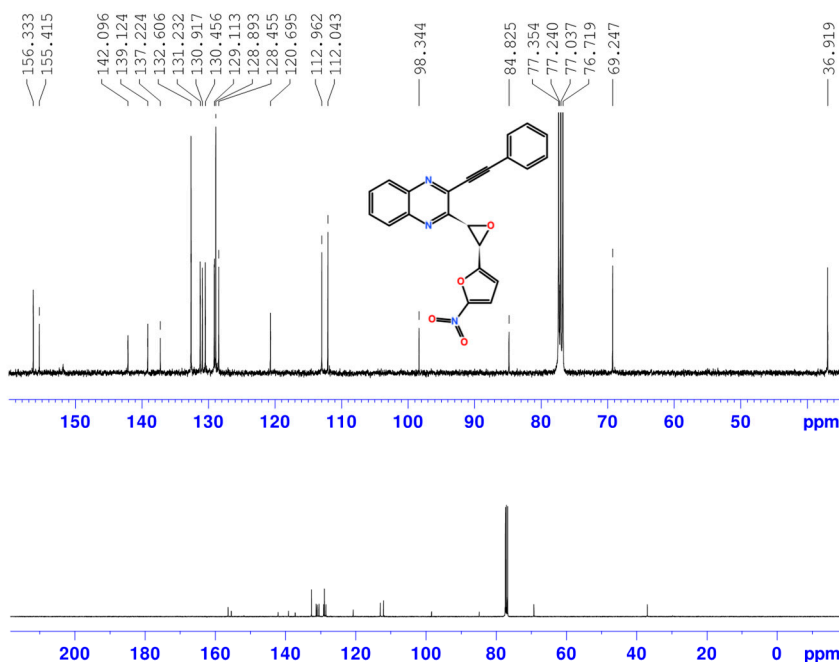

Current Data Parameters  
NAME PEP43\_13C  
EXPNO 12  
PROCNO 1

F2 - Acquisition Parameters  
Date\_ 20220208  
Time 1.44 h  
INSTRUM Avance NEO 400  
PROBHD Z163739\_0130 (zgpg30)  
PULPROG zgpg30  
TD 65536  
SOLVENT CDCl<sub>3</sub>  
NS 2048  
DS 4  
SWH 23809.523 Hz  
FIDRES 0.726609 Hz  
AQ 1.3762560 sec  
RG 101  
DW 21.000 usec  
DE 6.50 usec  
TE 298.0 K  
D1 2.00000000 sec  
D11 0.03000000 sec  
TD0 1  
SFO1 100.6228298 MHz  
NUC1 13C  
P0 2.67 usec  
P1 8.00 usec  
PLW1 95.56300354 W  
SFO2 400.1316005 MHz  
NUC2 1H  
CPOPRG(2) waltz65  
PCPD2 90.00 usec  
PLW2 22.80999947 W  
PLW12 0.15967000 W  
PLW13 0.08031400 W

F2 - Processing parameters  
SI 32768  
SF 100.6127685 MHz  
WDW EM  
SSB 0  
LB 1.00 Hz  
GB 0  
PC 1.40

## Compound 24a

PEP64 HCOOEt

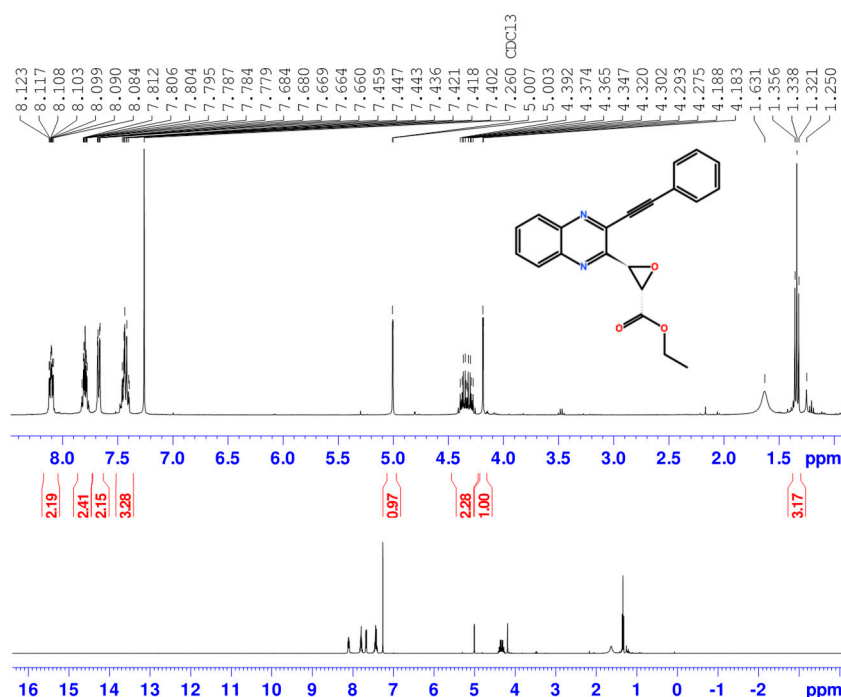

Current Data Parameters  
 NAME PEP64\_1H  
 EXPNO 10  
 PROCNO 1  
 F2 - Acquisition Parameters  
 Date\_ 20200625  
 Time 16.20 h  
 INSTRUM Avance NEO 400  
 PROBHD Z163739\_0130 ( )  
 PULPROG zg30  
 TD 65536  
 SOLVENT CDCl3  
 NS 16  
 DS 2  
 SWH 8196.722 Hz  
 FIDRES 0.250144 Hz  
 AQ 3.9976959 sec  
 RG 101  
 DW 61.000 usec  
 DE 13.97 usec  
 TE 298.0 K  
 D1 1.00000000 sec  
 TD0 1  
 SFO1 400.1324708 MHz  
 NUC1 1H  
 P0 2.51 usec  
 P1 7.53 usec  
 PLW1 22.80999947 W  
 F2 - Processing parameters  
 SI 65536  
 SF 400.1300105 MHz  
 WDW EM  
 SSB 0  
 LB 0.30 Hz  
 GB 0  
 PC 1.00

PEP64

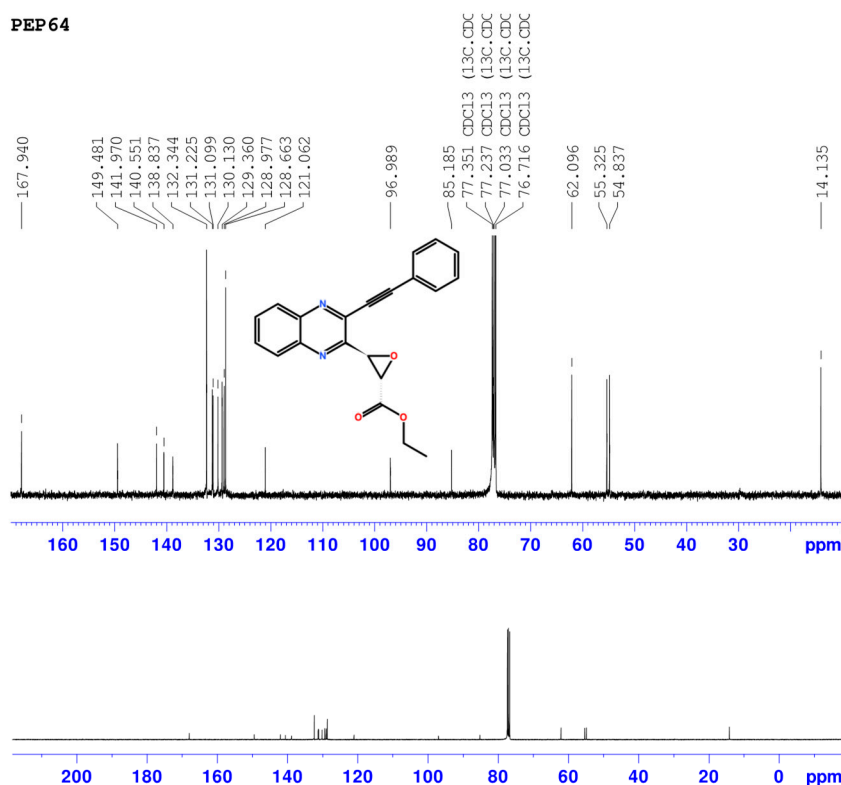

Current Data Parameters  
 NAME PEP64\_13C  
 EXPNO 12  
 PROCNO 1  
 F2 - Acquisition Parameters  
 Date\_ 20200627  
 Time 21.55 h  
 INSTRUM Avance NEO 400  
 PROBHD Z163739\_0130 ( )  
 PULPROG zgpg30  
 TD 65536  
 SOLVENT CDCl3  
 NS 2048  
 DS 4  
 SWH 23809.523 Hz  
 FIDRES 0.726609 Hz  
 AQ 1.3762560 sec  
 RG 101  
 DW 21.000 usec  
 DE 6.50 usec  
 TE 298.0 K  
 D1 2.00000000 sec  
 D11 0.03000000 sec  
 TD0 1  
 SFO1 100.6228298 MHz  
 NUC1 13C  
 P0 2.67 usec  
 P1 8.00 usec  
 PLW1 95.56300354 W  
 SFO2 400.1316005 MHz  
 NUC2 1H  
 CPGPRG2 waltz65  
 PCPD2 90.00 usec  
 PLW2 22.80999947 W  
 PLW12 0.15967000 W  
 PLW13 0.08031400 W  
 F2 - Processing parameters  
 SI 32768  
 SF 100.6127685 MHz  
 WDW EM  
 SSB 0  
 LB 1.00 Hz  
 GB 0  
 PC 1.40

Data File C:\Chem32\...rganique\prestation\_chimie\_organique 2022-05-31\OnlineEdited--040.D  
Sample Name: PEP64

```
=====
Acq. Operator   : SYSTEM                      Seq. Line :   40
Acq. Instrument : LC1290                     Location  :   P1-E3
Injection Date  : 31/5/2022 11:27:59 PM      Inj       :    1
                                           Inj Volume: 1.000 µl
Method          : C:\Chem32\1\Data\prestation_chimie_organique\prestation_chimie_organique
                  2022-05-31\prestation_chimie_org.M (Sequence Method)
Last changed    : 31/5/2022 1:07:56 PM by SYSTEM
Additional Info  : Peak(s) manually integrated
=====
```

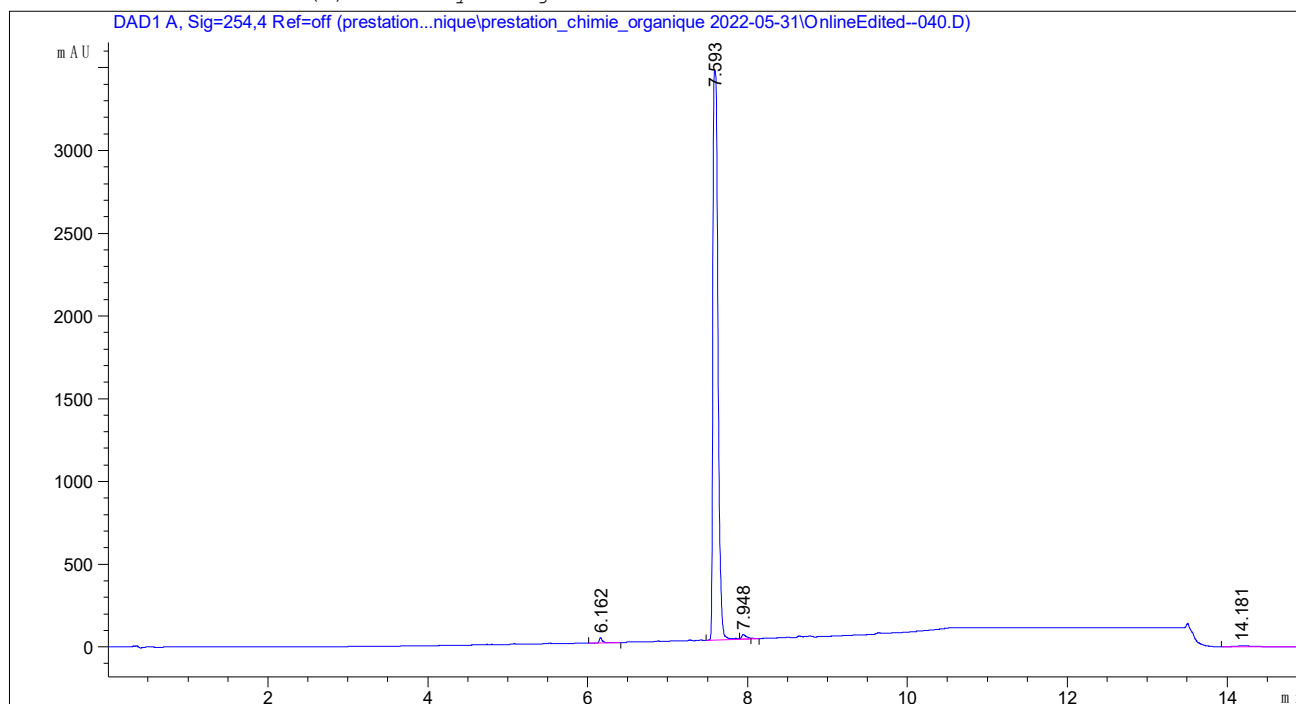

=====  
Area Percent Report  
=====

```
Sorted By      :      Signal
Multiplier     :      1.0000
Dilution       :      1.0000
Use Multiplier & Dilution Factor with ISTDs
```

Signal 1: DAD1 A, Sig=254,4 Ref=off

| Peak # | RetTime [min] | Type | Width [min] | Area [mAU*s] | Height [mAU] | Area %  |
|--------|---------------|------|-------------|--------------|--------------|---------|
| 1      | 6.162         | BV R | 0.0395      | 91.22353     | 31.71634     | 0.5877  |
| 2      | 7.593         | BV R | 0.0704      | 1.51796e4    | 3439.07544   | 97.7983 |
| 3      | 7.948         | VV E | 0.0582      | 120.64300    | 29.18264     | 0.7773  |
| 4      | 14.181        | BBA  | 0.3004      | 129.86763    | 6.10058      | 0.8367  |

Totals :                      1.55214e4   3506.07499



## Compound 25

PEP33- (CO<sub>2</sub>Et) 2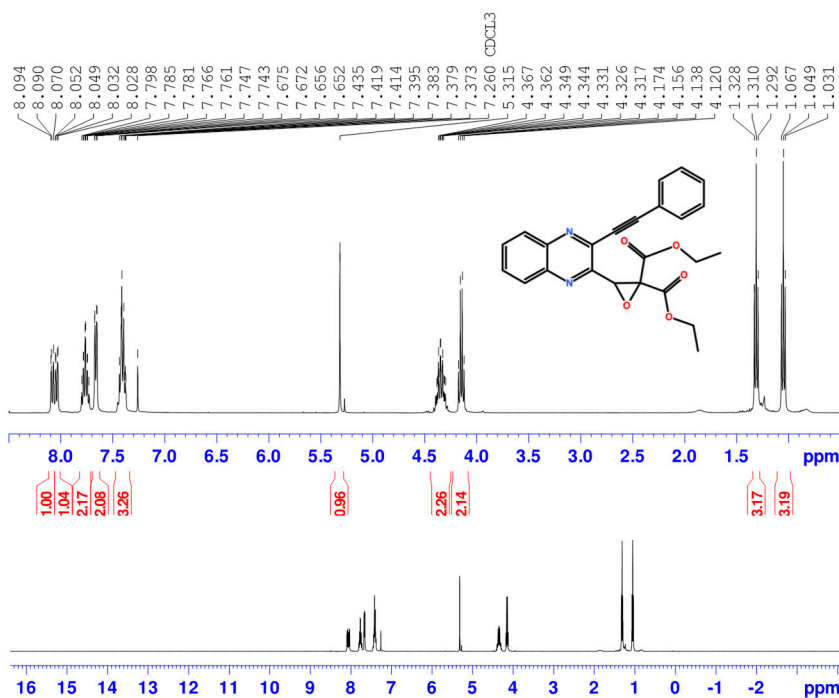

Current Data Parameters  
 NAME PEP33\_1H  
 EXPNO 10  
 PROCNO 1  
 F2 - Acquisition Parameters  
 Date\_ 20200619  
 Time 12.25 h  
 INSTRUM Avance NEO 400  
 PROBHD Z163739\_0130 (   
 PULPROG zg30  
 TD 65536  
 SOLVENT CDCl3  
 NS 16  
 DS 2  
 SWH 8196.722 Hz  
 FIDRES 0.250144 Hz  
 AQ 3.9976959 sec  
 RG 45.2033  
 DW 61.000 usec  
 DE 13.97 usec  
 TE 298.0 K  
 D1 1.00000000 sec  
 TD0 1  
 SFO1 400.1324708 MHz  
 NUC1 1H  
 P0 2.51 usec  
 P1 7.53 usec  
 PLW1 22.80999947 W

F2 - Processing Parameters  
 SI 65536  
 SF 400.1300107 MHz  
 WDW EM  
 SSB 0  
 LB 0.30 Hz  
 GB 0  
 PC 1.00

PEP33- (CO<sub>2</sub>Et) 2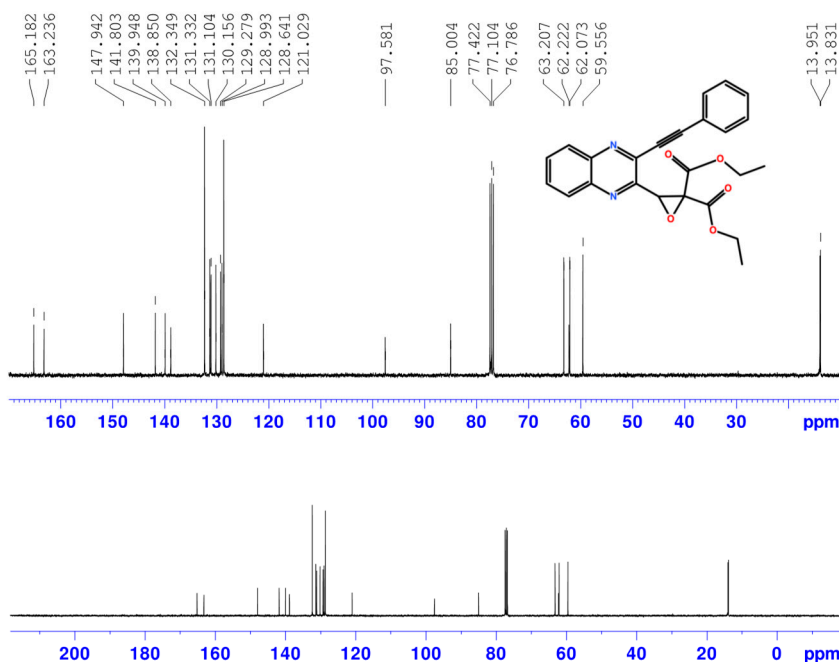

Current Data Parameters  
 NAME PEP33\_13C  
 EXPNO 11  
 PROCNO 1  
 F2 - Acquisition Parameters  
 Date\_ 20200622  
 Time 10.15 h  
 INSTRUM Avance NEO 400  
 PROBHD Z163739\_0130 (   
 PULPROG zgpg30  
 TD 65536  
 SOLVENT CDCl3  
 NS 128  
 DS 4  
 SWH 23809.523 Hz  
 FIDRES 0.726609 Hz  
 AQ 1.3762560 sec  
 RG 101  
 DW 21.000 usec  
 DE 6.50 usec  
 TE 298.0 K  
 D1 2.00000000 sec  
 D11 0.03000000 sec  
 TD0 1  
 SFO1 100.6228298 MHz  
 NUC1 13C  
 P0 2.67 usec  
 P1 8.00 usec  
 PLW1 95.56300354 W  
 SFO2 400.1316005 MHz  
 NUC2 1H  
 CPGPRG2 waltz65  
 PCPD2 90.00 usec  
 PLM2 22.80999947 W  
 PLW2 0.15967000 W  
 PLW3 0.08031400 W

F2 - Processing Parameters  
 SI 32768  
 SF 100.6127685 MHz  
 WDW EM  
 SSB 0  
 LB 1.00 Hz  
 GB 0  
 PC 1.40

Data File C:\Chem32\...\rganique\prestation\_chimie\_organique 2022-05-31\OnlineEdited--030.D  
 Sample Name: PEP33

```
=====
Acq. Operator   : SYSTEM                      Seq. Line :   30
Acq. Instrument : LC1290                     Location  :   P1-D2
Injection Date  : 31/5/2022 8:50:15 PM        Inj       :    1
                                           Inj Volume: 1.000 µl

Method          : C:\Chem32\1\Data\prestation_chimie_organique\prestation_chimie_organique
                  2022-05-31\prestation_chimie_org.M (Sequence Method)
Last changed    : 31/5/2022 1:07:56 PM by SYSTEM
Additional Info : Peak(s) manually integrated
```

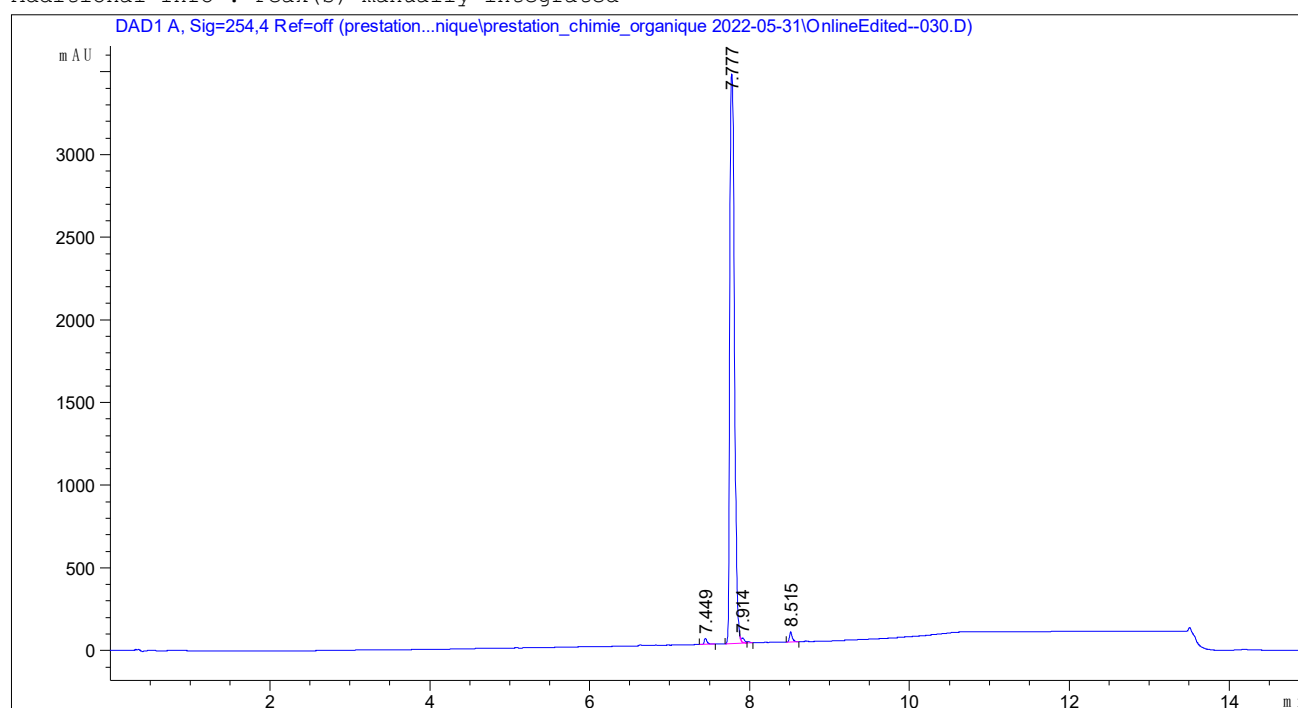

=====  
 Area Percent Report  
 =====

```
Sorted By      :      Signal
Multiplier     :      1.0000
Dilution       :      1.0000
Use Multiplier & Dilution Factor with ISTDs
```

Signal 1: DAD1 A, Sig=254.4 Ref=off

| Peak # | RetTime [min] | Type | Width [min] | Area [mAU*s] | Height [mAU] | Area %  |
|--------|---------------|------|-------------|--------------|--------------|---------|
| 1      | 7.449         | BV R | 0.0375      | 91.06236     | 36.00343     | 0.6481  |
| 2      | 7.777         | BV R | 0.0625      | 1.37244e4    | 3442.15552   | 97.6824 |
| 3      | 7.914         | VV E | 0.0399      | 75.30146     | 27.51309     | 0.5360  |
| 4      | 8.515         | BB   | 0.0384      | 159.26624    | 63.13708     | 1.1336  |

Totals :                      1.40500e4   3568.80912
